# Supplementary material
Source: PubMed Central journal article supplement (PMC3164278)

Supporting Information II:

**Vinylogous Aldol Products From Chiral Crotylsilanes Obtained By  
Enantioselective Rh(II) and Cu(I) Carbenoid Si-H Insertion**

Jie Wu, Yu Chen and James S. Panek\*

Department of Chemistry and Center for Chemical Methodology and Library  
Development (CMLD-BU), Metcalf Center for Science and Engineering,  
590 Commonwealth Avenue,  
Boston University, Boston, Massachusetts 02215

**Photocopies of  $^1\text{H}$  and  $^{13}\text{C}$  NMR Spectra**

Sample: dimesi  
Sample ID: s\_41\_09  
File: home/walkepl/W100/jasonw/20080515/dimesi\_Proton\_01.Fid  
Pulse Sequence: s2pu1

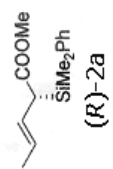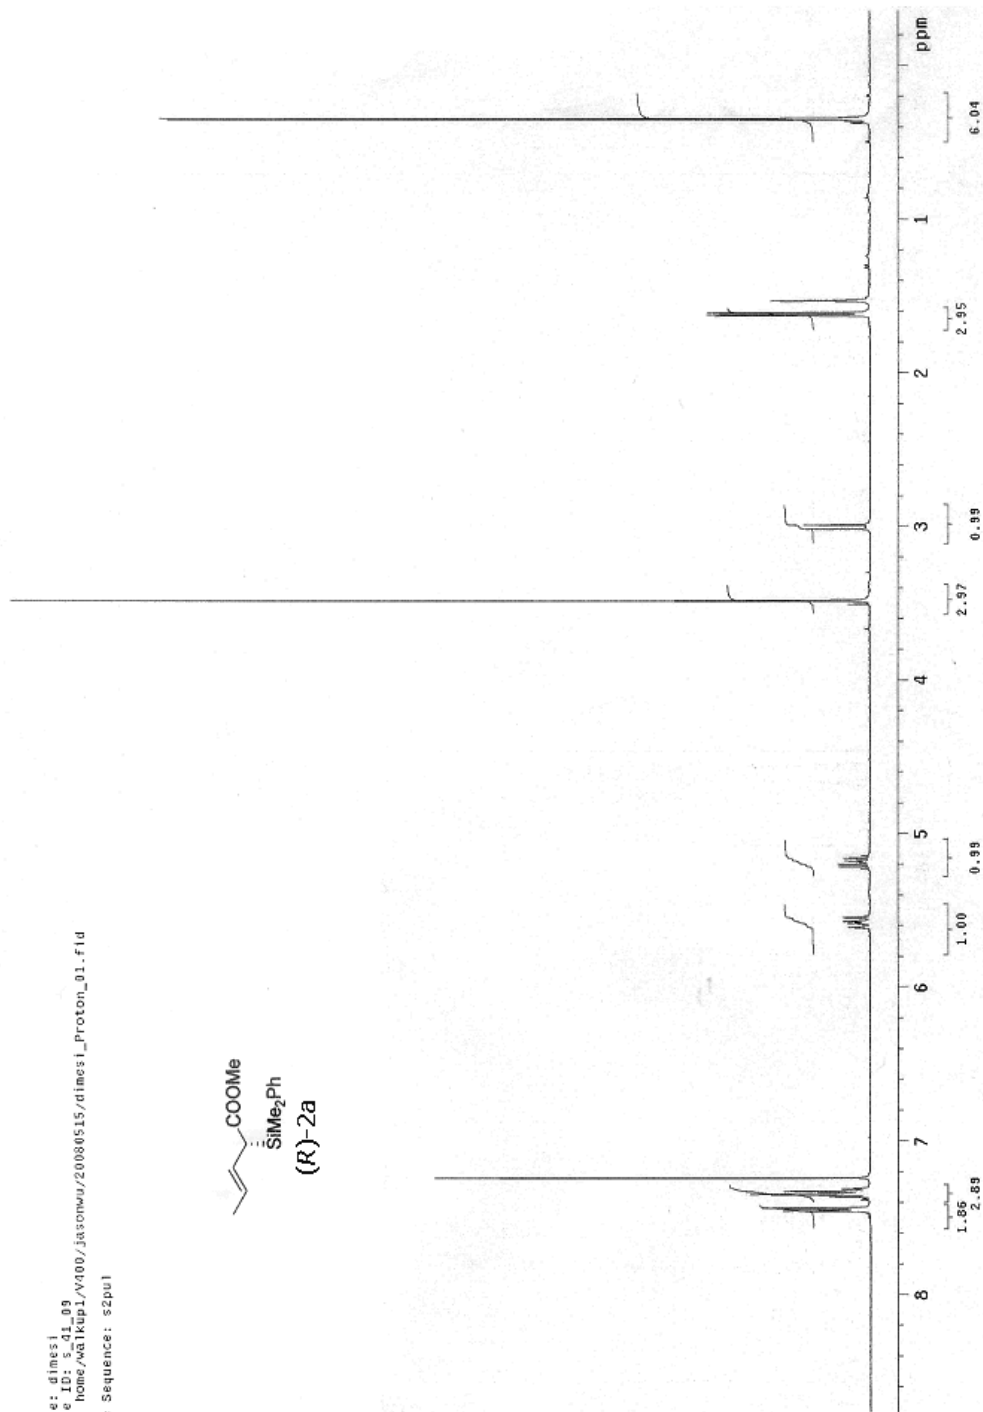

pad=1 run with findz0 before acquisition  
pad=1 run with gradshim before acquisition  
File: dimephs1\_Carbon\_01  
Pulse Sequence: szpu1

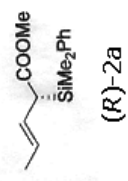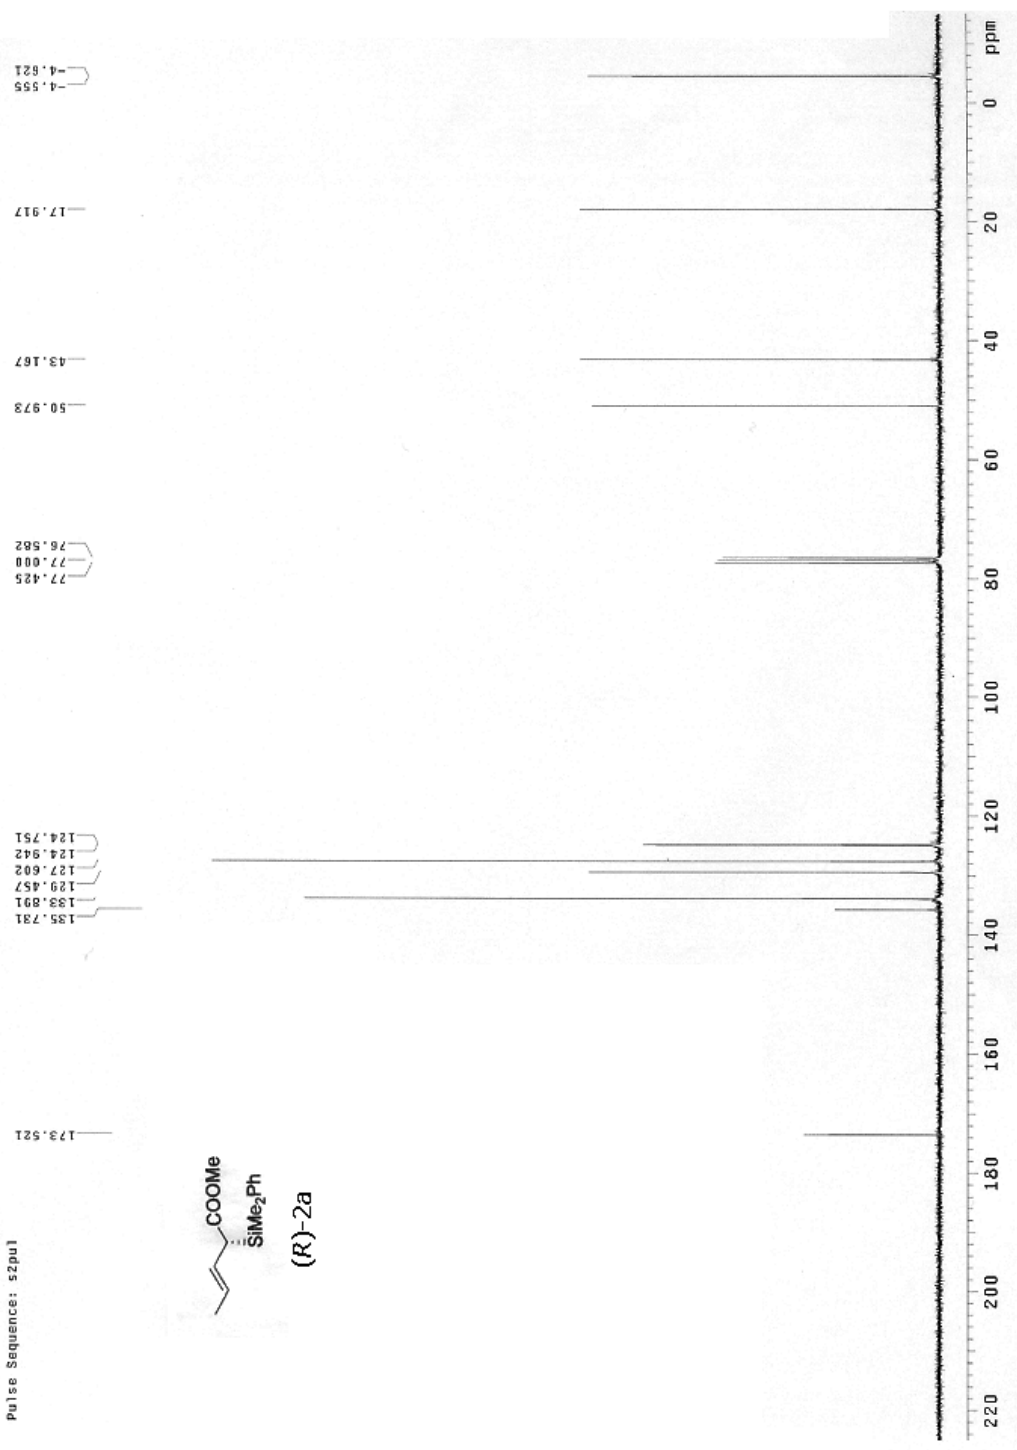

Sample: Dimethylphenyl\_0180PS ether  
Sample ID: s\_14\_01  
File: home/walkup1/V400/chenyu/20080920/Dimethylphenyl\_0180PS\_ether\_proton\_01.fid  
Pulse Sequence: s2pu1

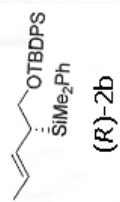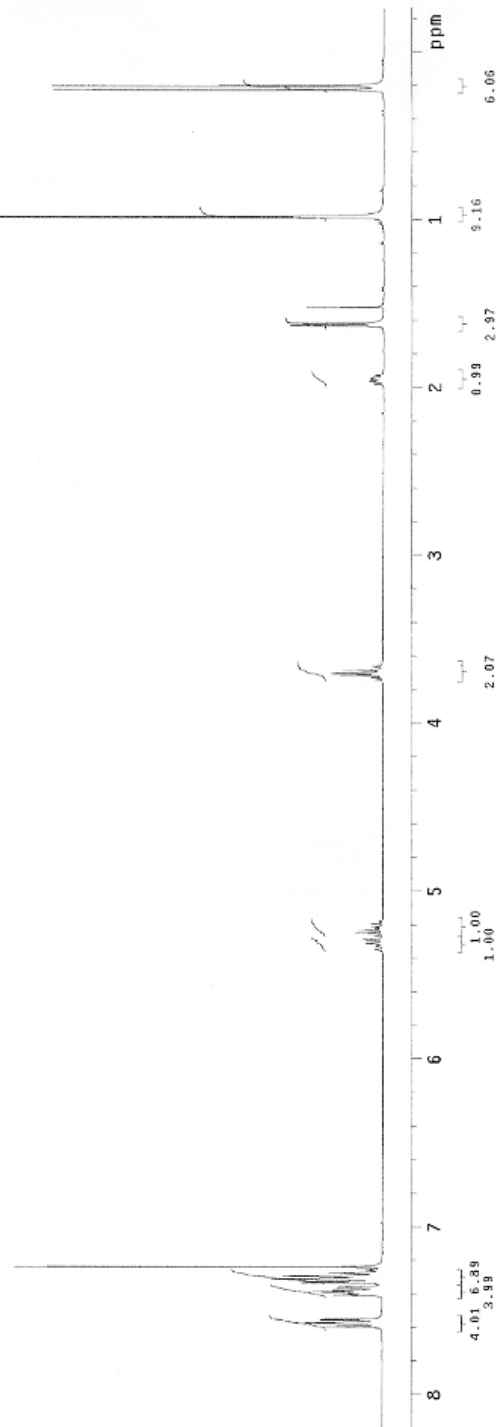

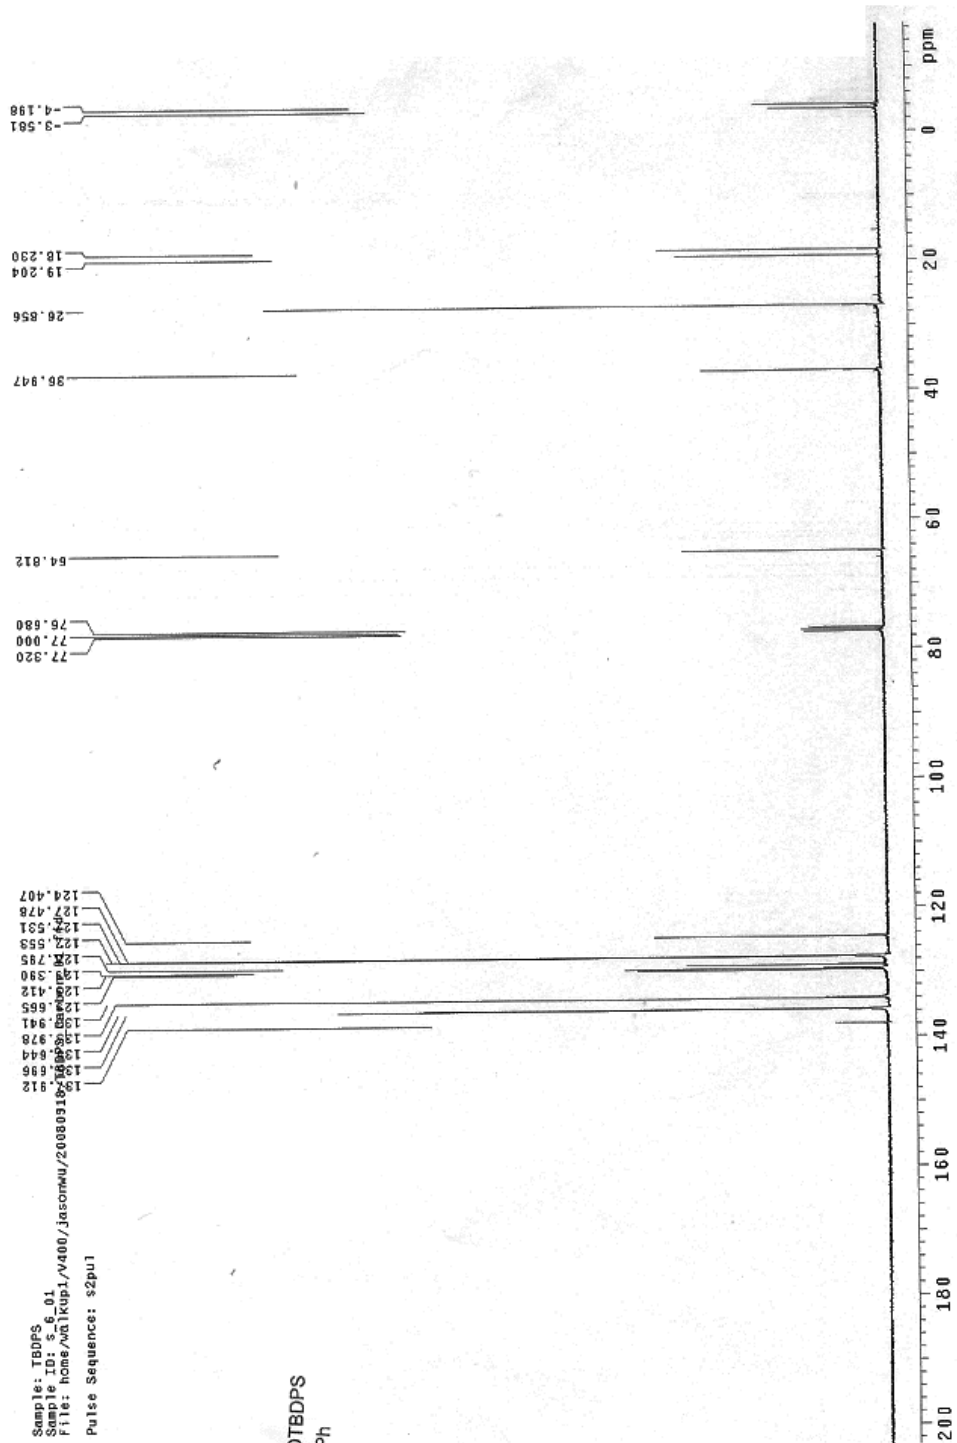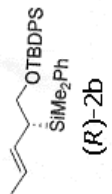

Sample: oomb  
Sample ID: S\_44\_06  
File: home/wa/kup1/v4100/jasonwu/20080821/opmb\_Proton\_01.fid  
Pulse Sequence: s2pul

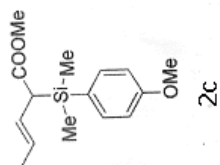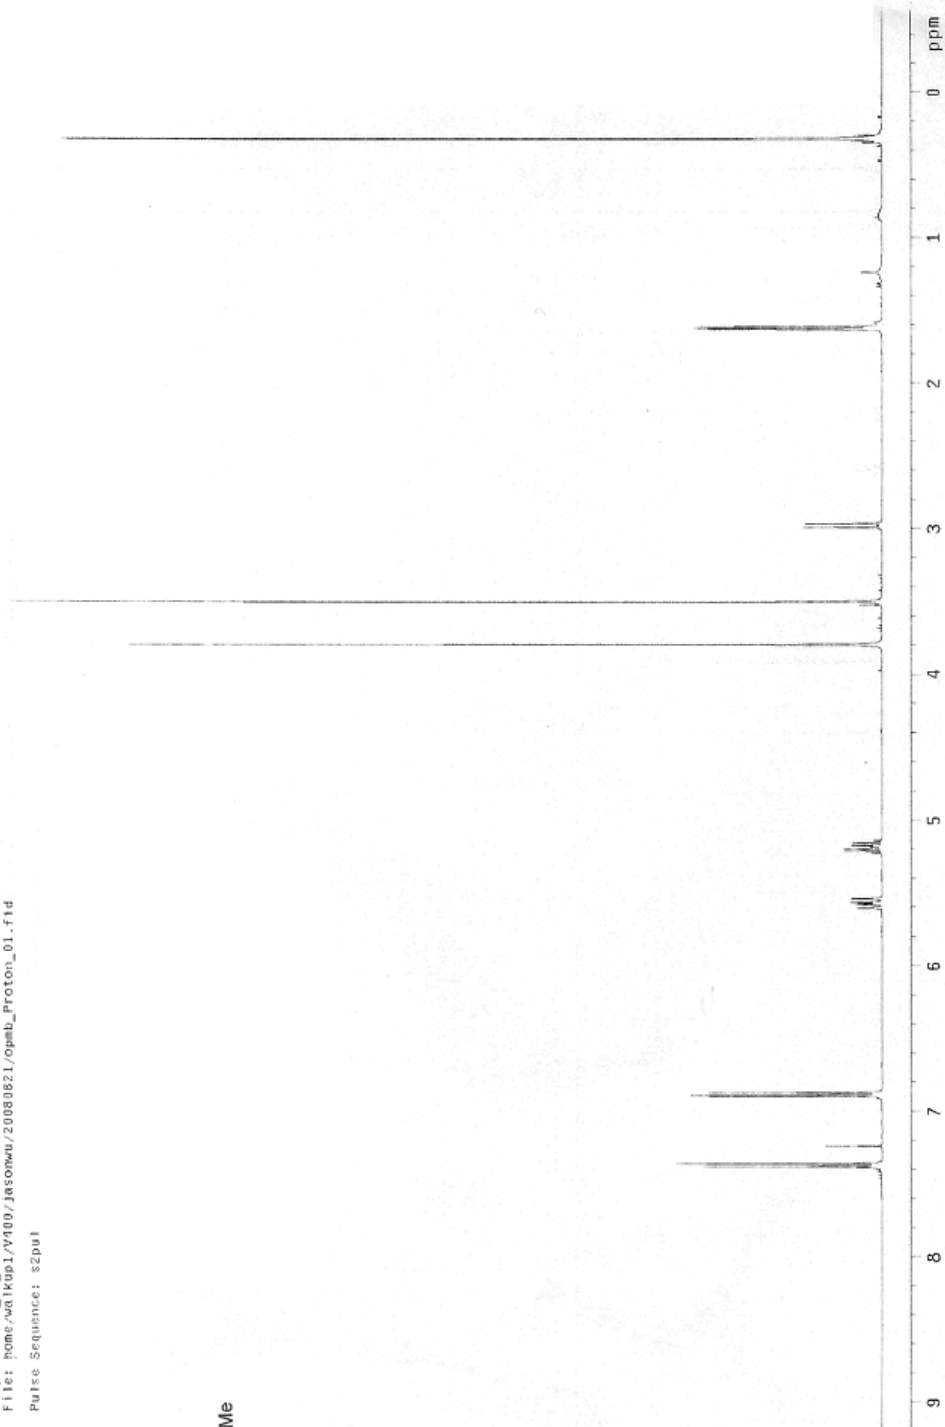

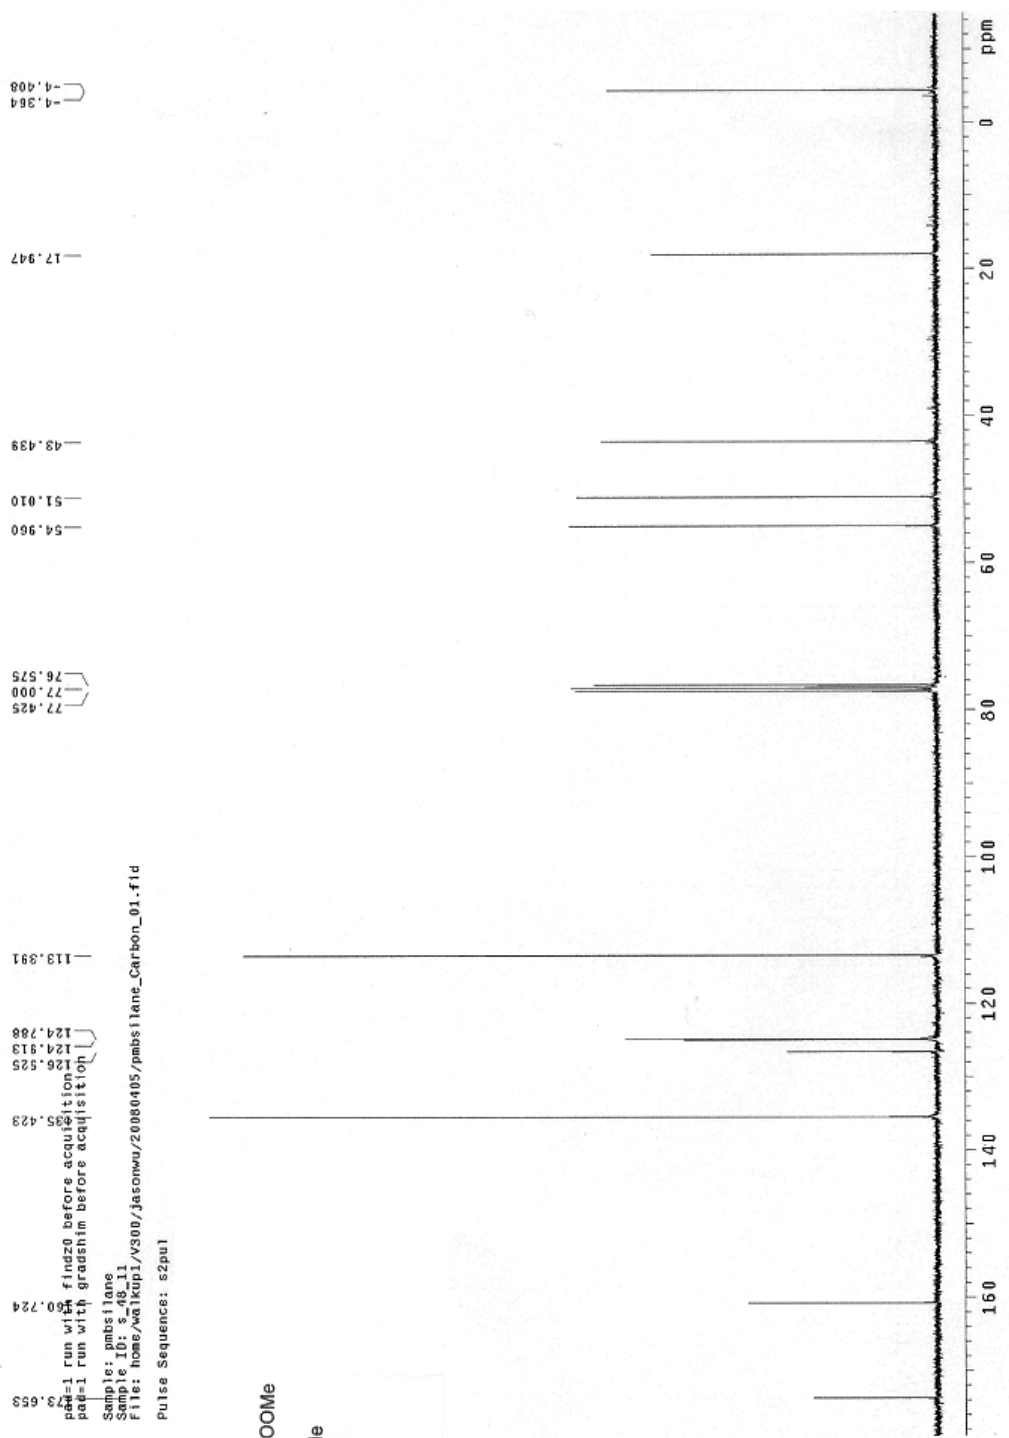

pep-1 run with findz0 before acquisition  
 pep-1 run with gradshim before acquisition  
 Sample: pmbstilane  
 Sample ID: 5\_48\_11  
 File: home/walkup1/VS00/Jasonwu/20080405/pmbstilane\_Carbon\_01.fid  
 Pulse Sequence: s2pu1

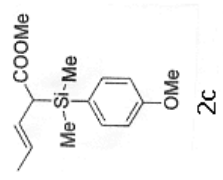

Sample: pentsp  
Sample ID: S\_12\_01  
File: home/waltdp1/V400/jasonwu/20050804/pentsp\_Proton\_01.fid  
Pulse Sequence: s2pu1

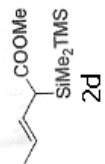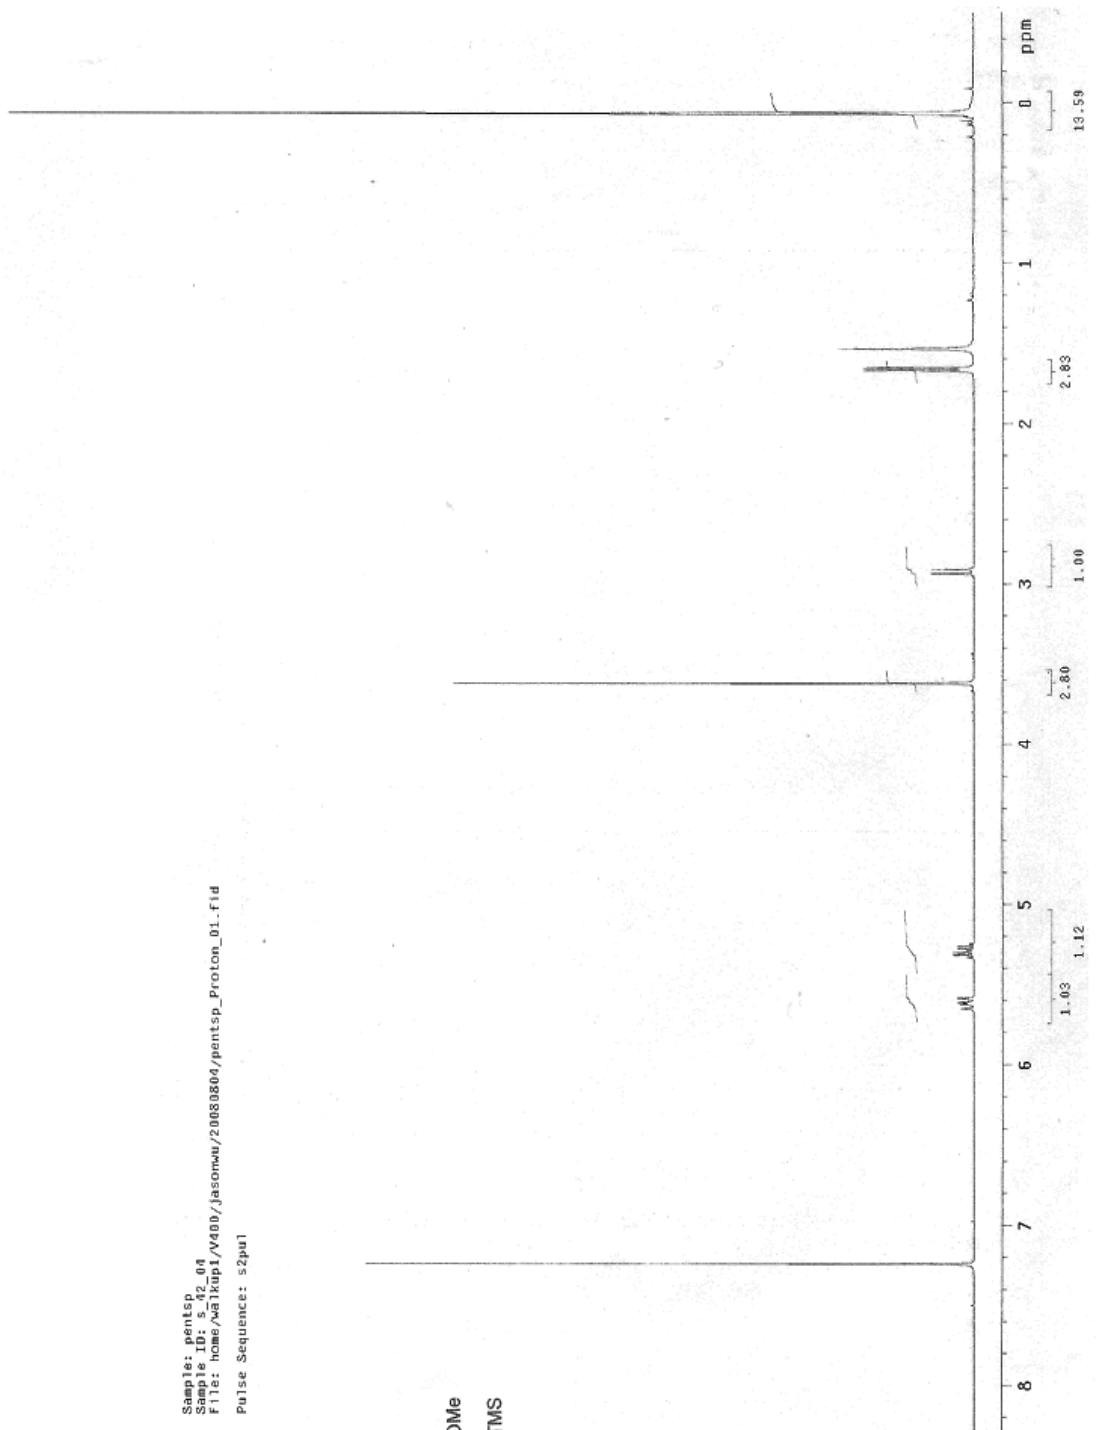



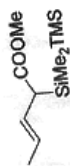

2d

pe051 run with gradshim before acquisition  
 Sample: s1  
 Sample ID: s\_3d\_01  
 File: home/waikup1/v2300/jasonwu/20080806/s\_3d\_01/carbon\_01.fid  
 Pulse Sequence: s2pu1

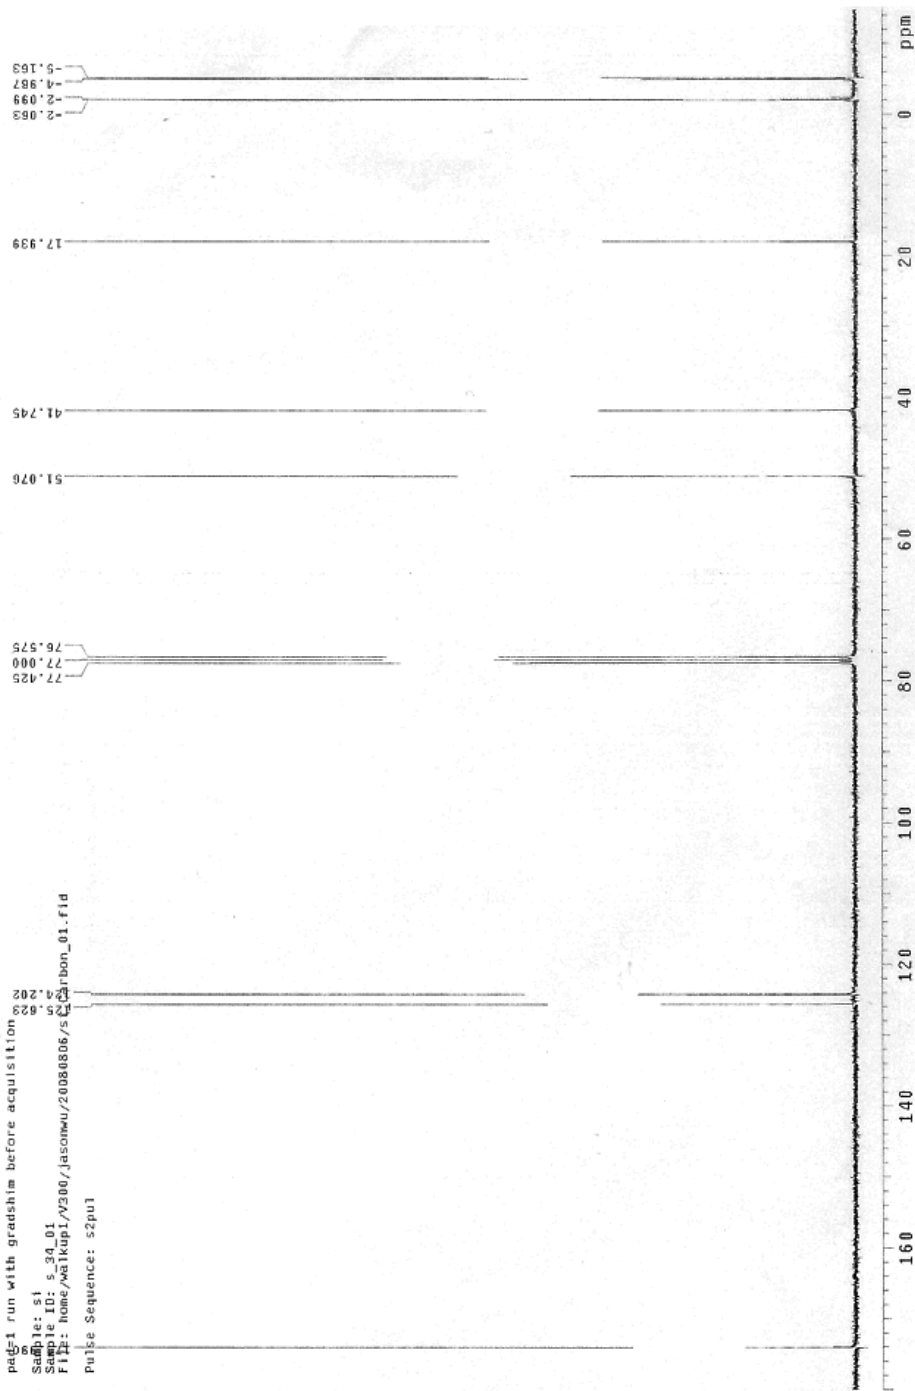

Sample: st  
Sample ID: s\_48\_03  
File: home/walkup1/V400/jasonwu/20081022/st\_Proton\_01.fid  
Pulse Sequence: s2pu1

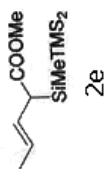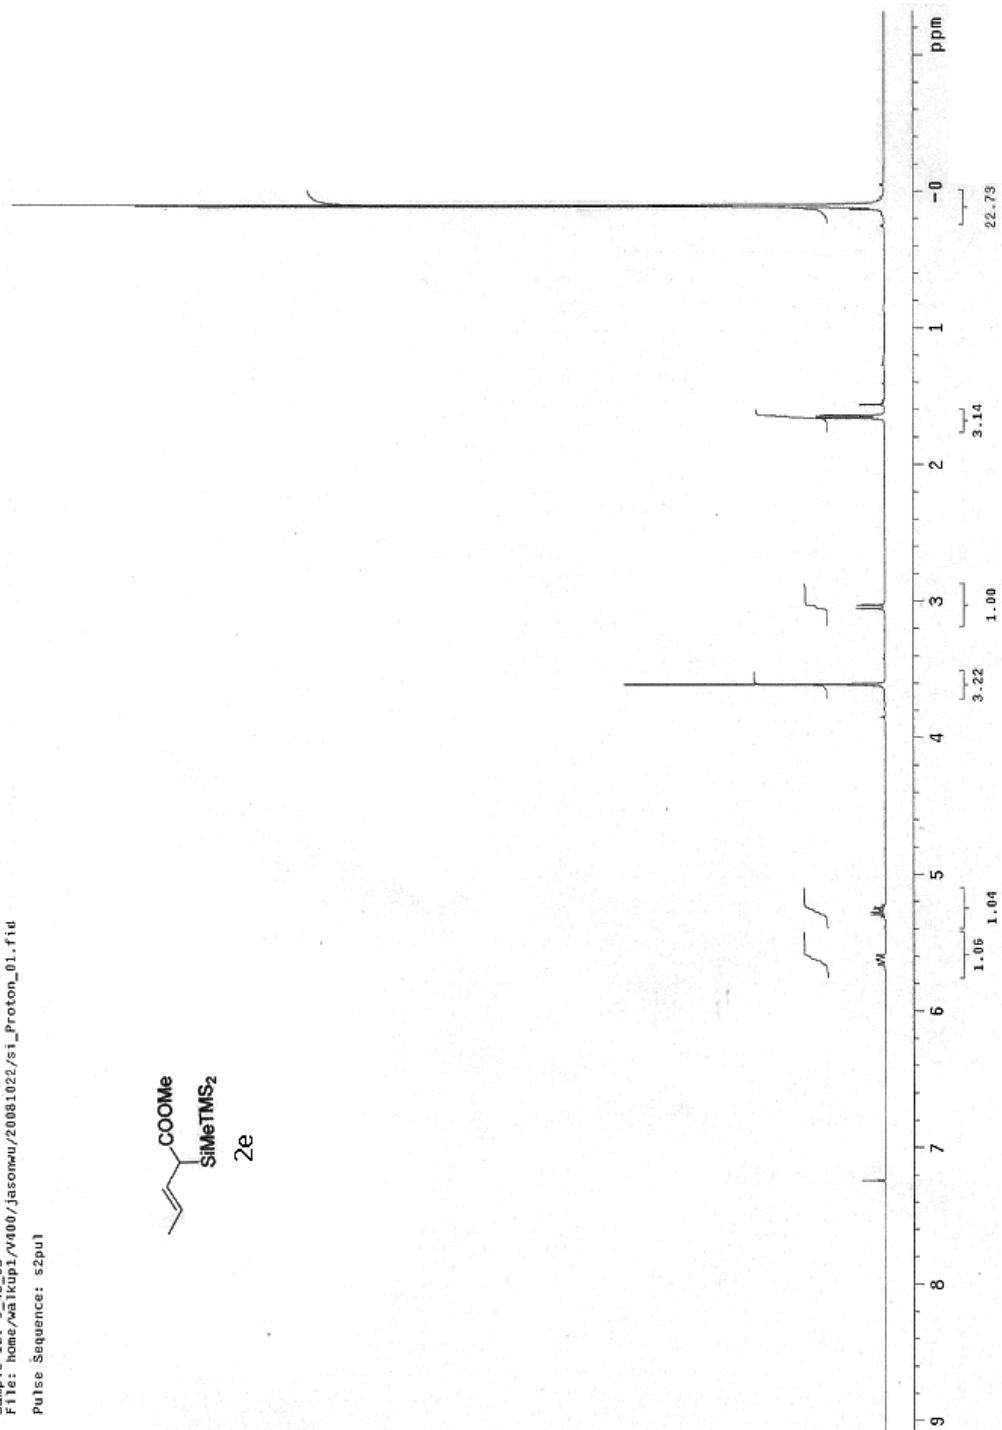

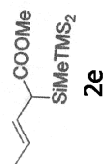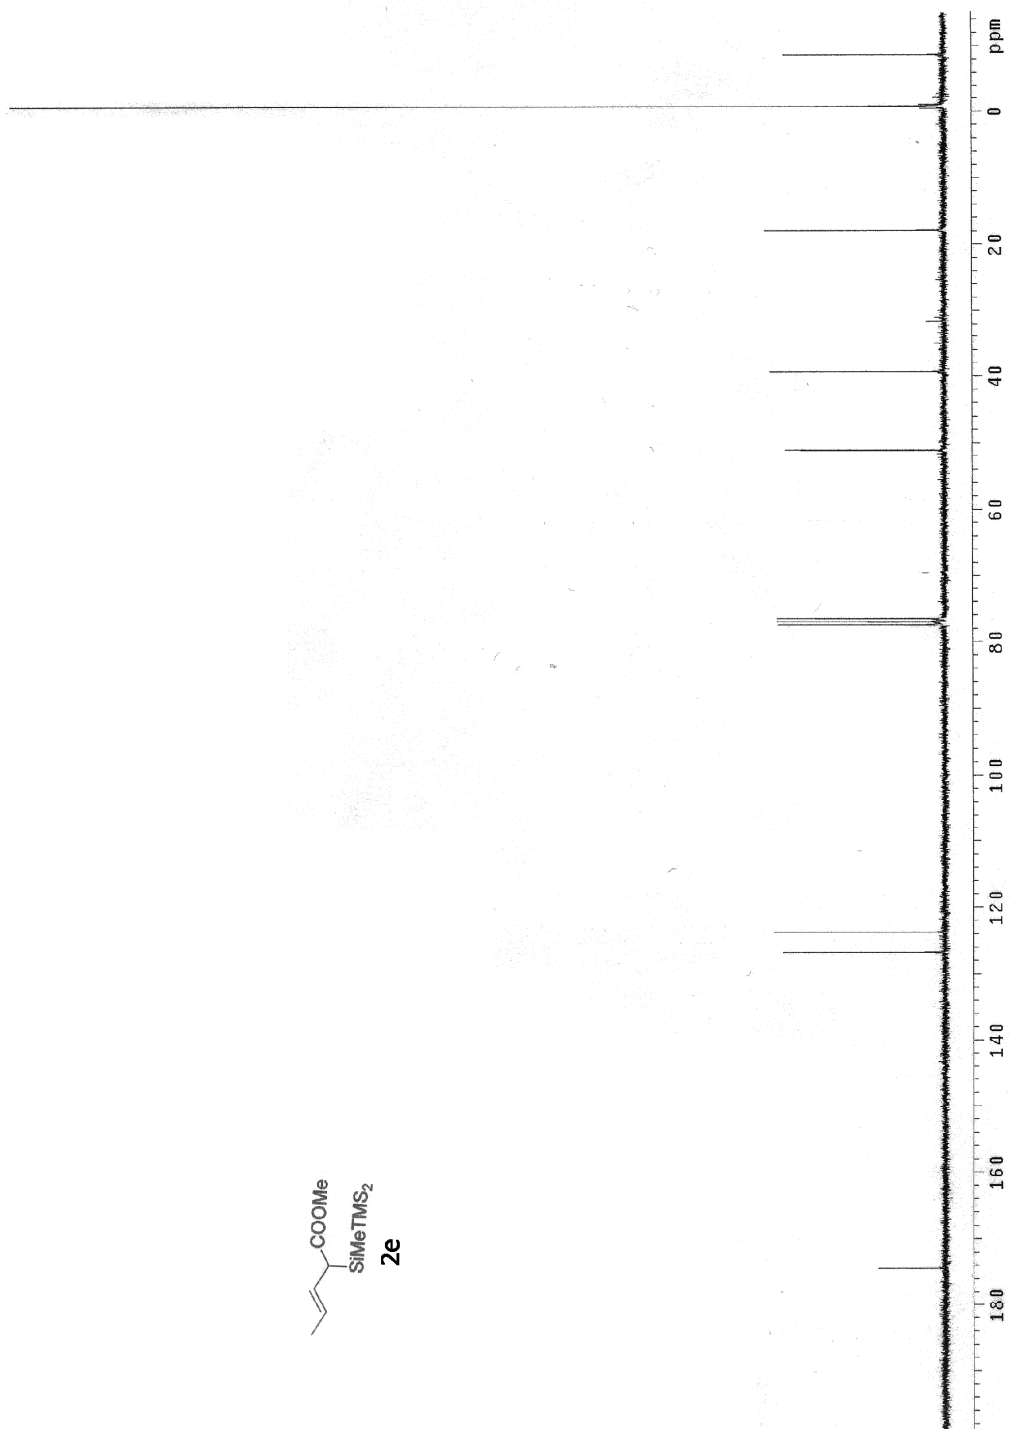

Sample: triethyl  
 Sample ID: S\_27\_05  
 File: home/walakup1/v400/jasonwu/20071229/triethyl\_Proton\_01.fid  
 Pulse Sequence: s2pu1

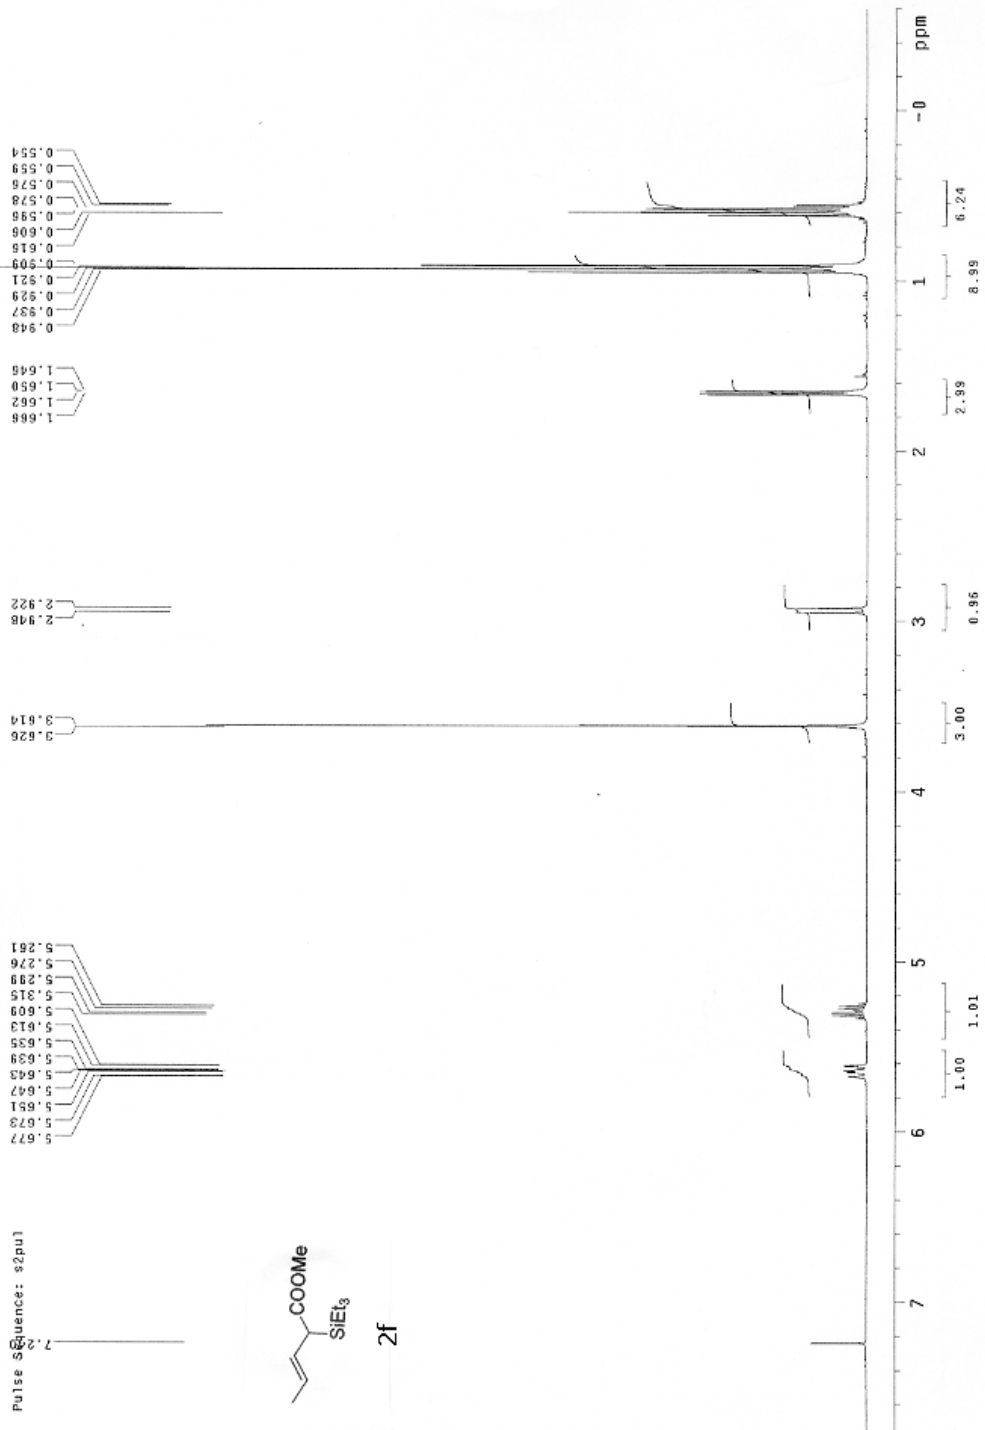

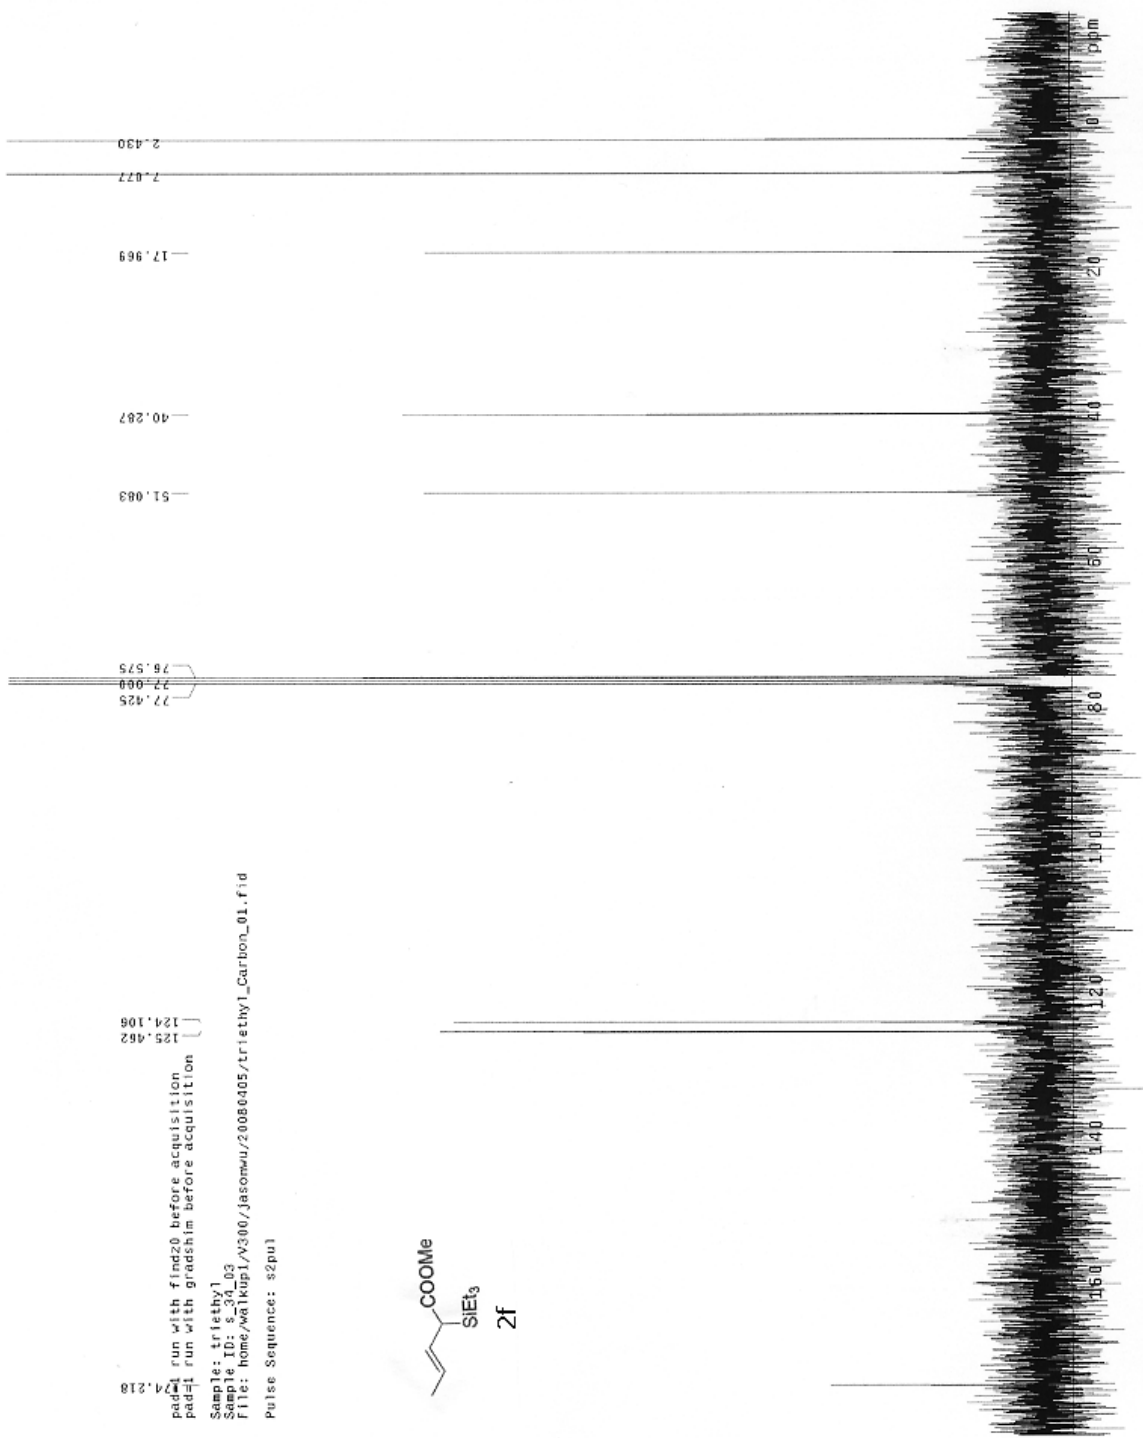

Sample: nbutylester  
Sample ID: 00000000  
File: home/walkup1/V4100/Jascowu/20080404/nbutylester\_Proton\_01.fid  
Pulse Sequence: s2pu1

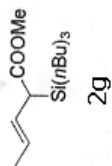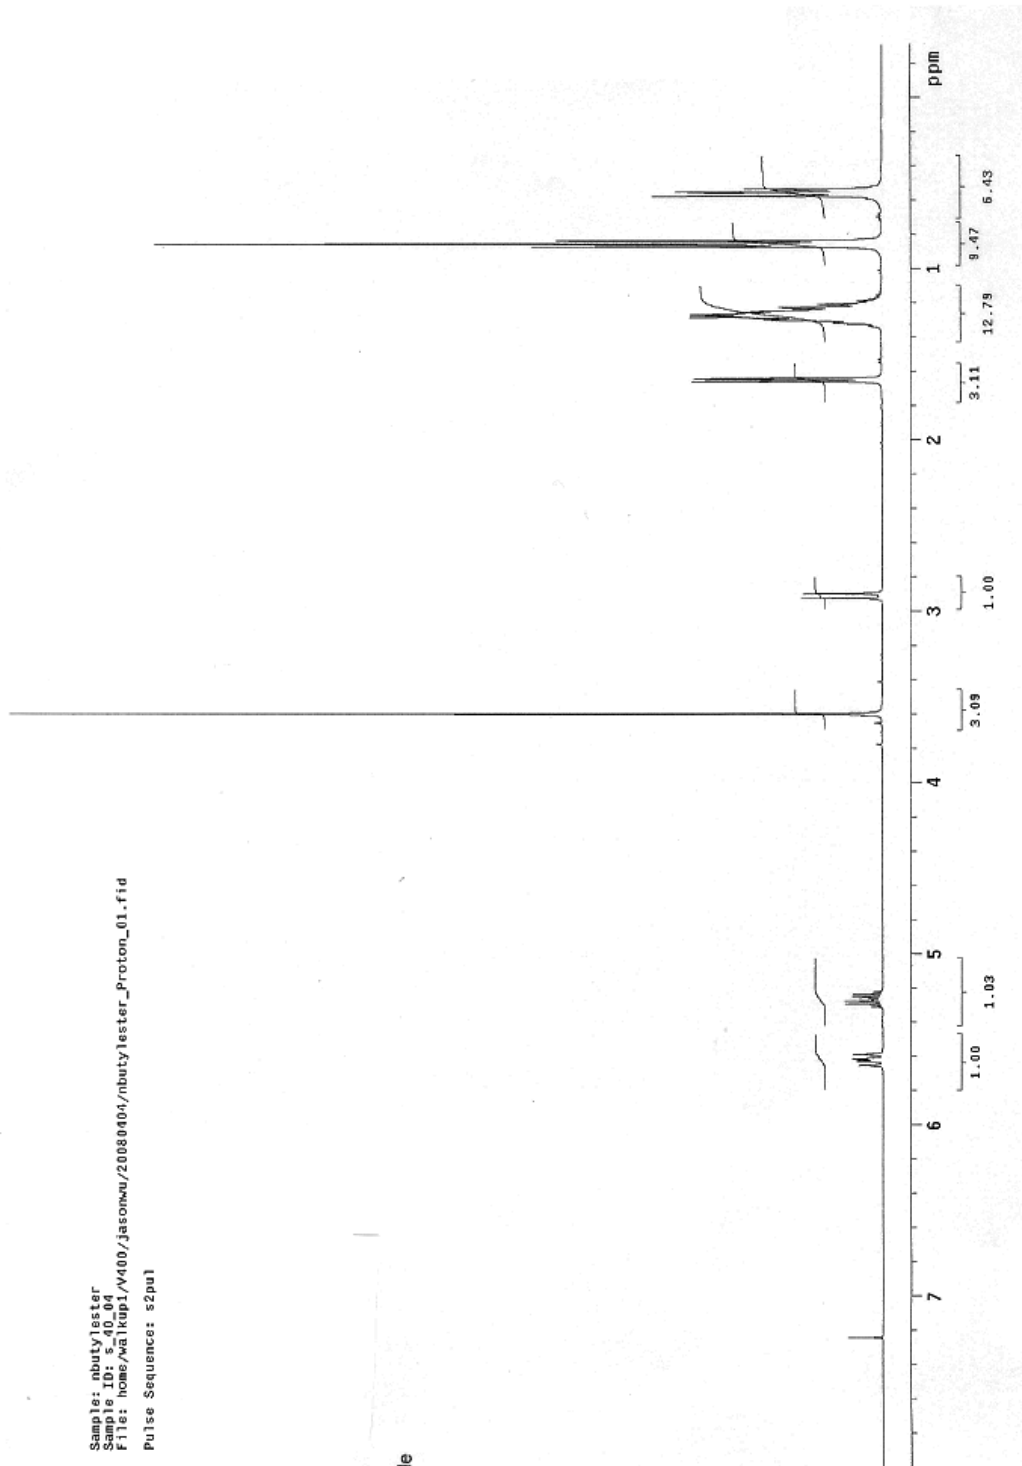

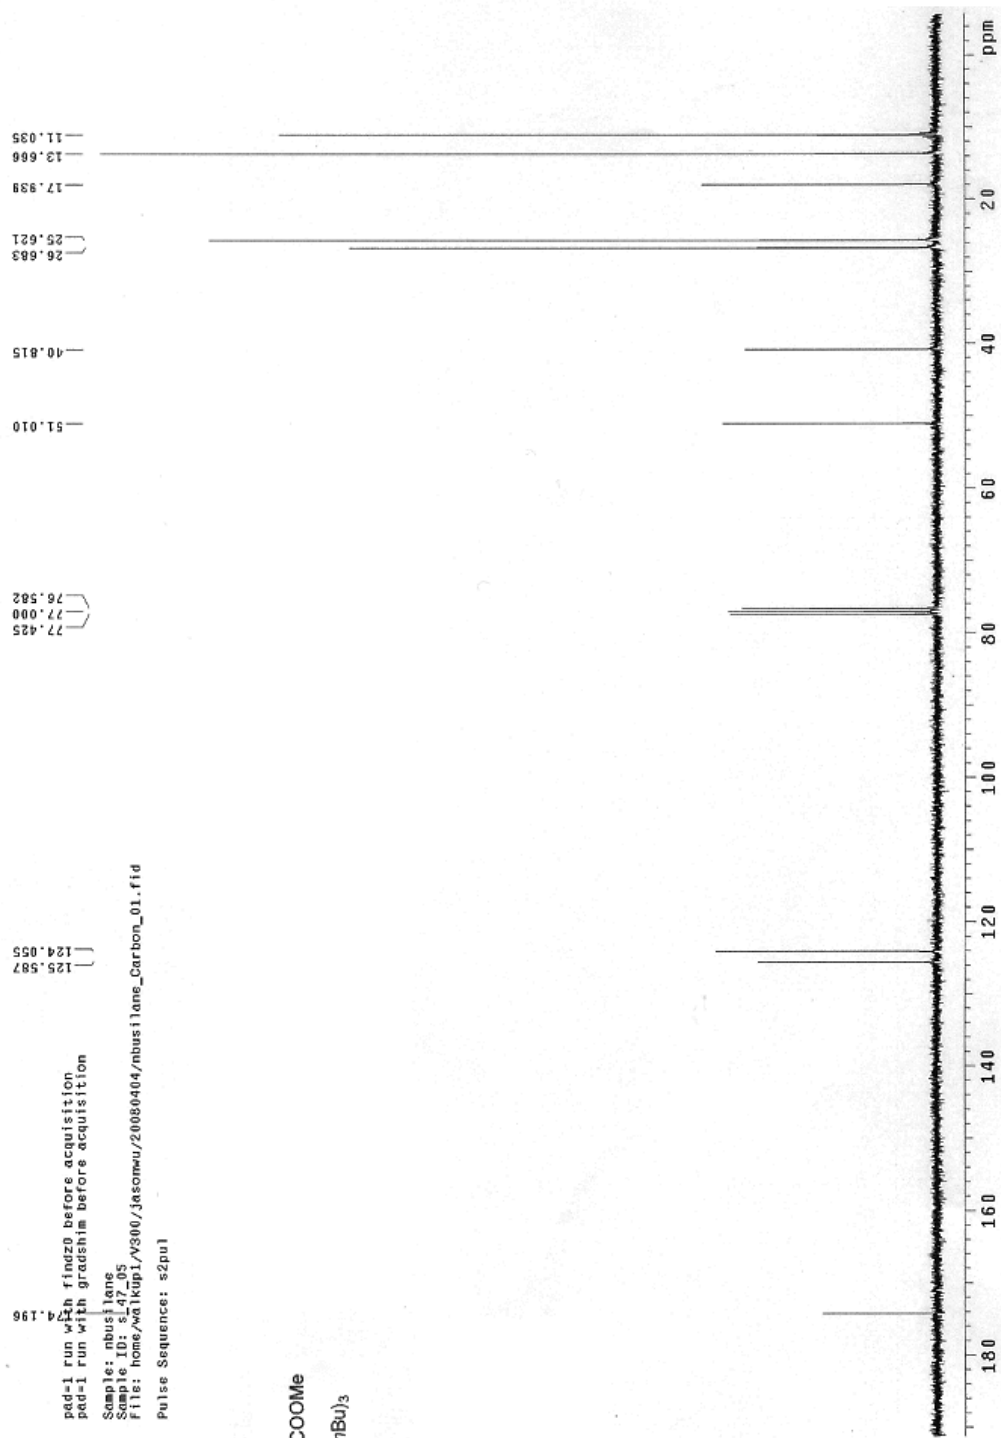

pad-1 run with findz0 before acquisition  
 pad-1 run with gradshim before acquisition  
 Sample: nbu3ilane  
 Sample ID: s\_17\_05  
 F1 file: home/wdtkp1/V300/jasomw/20050404/nbu3ilane\_Carbon\_01.fid  
 Pulse Sequence: s2pul

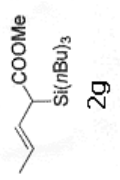

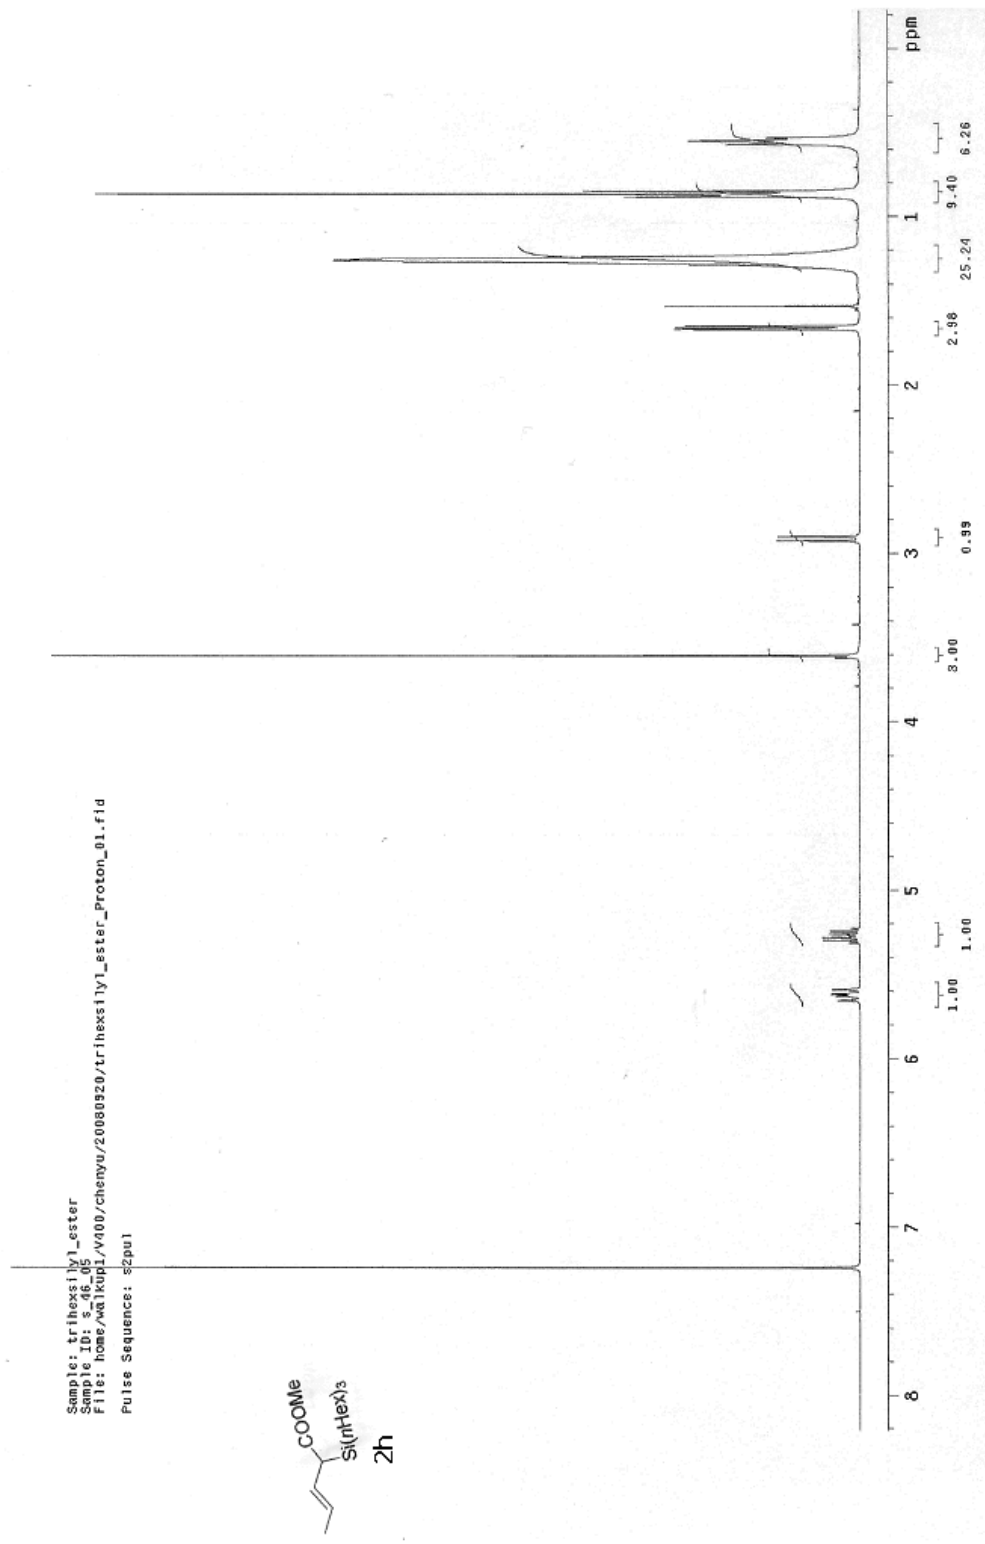



pad-1 run with findz0 before acquisition  
pad-1 run with gradshim before acquisition

Sample: nhexyl  
Sample ID: s\_38\_05  
File: home/wallop1/V300/Jasonwu/20080302/nhexyl\_Carbon\_01.fid  
Pulse Sequence: s2pu1

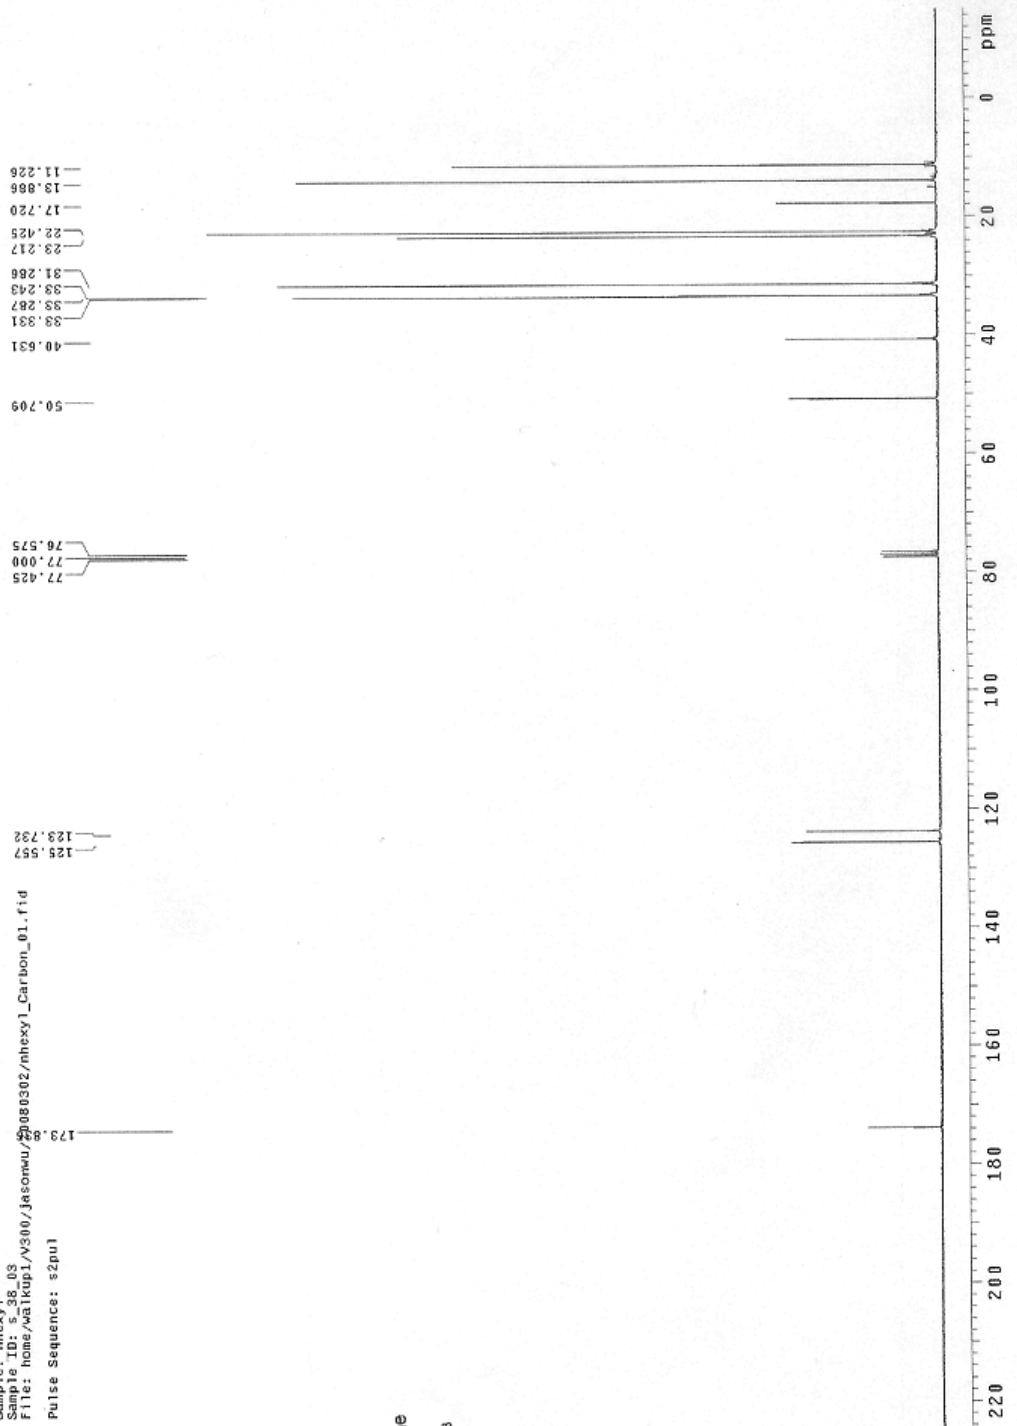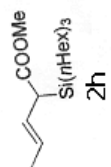

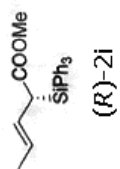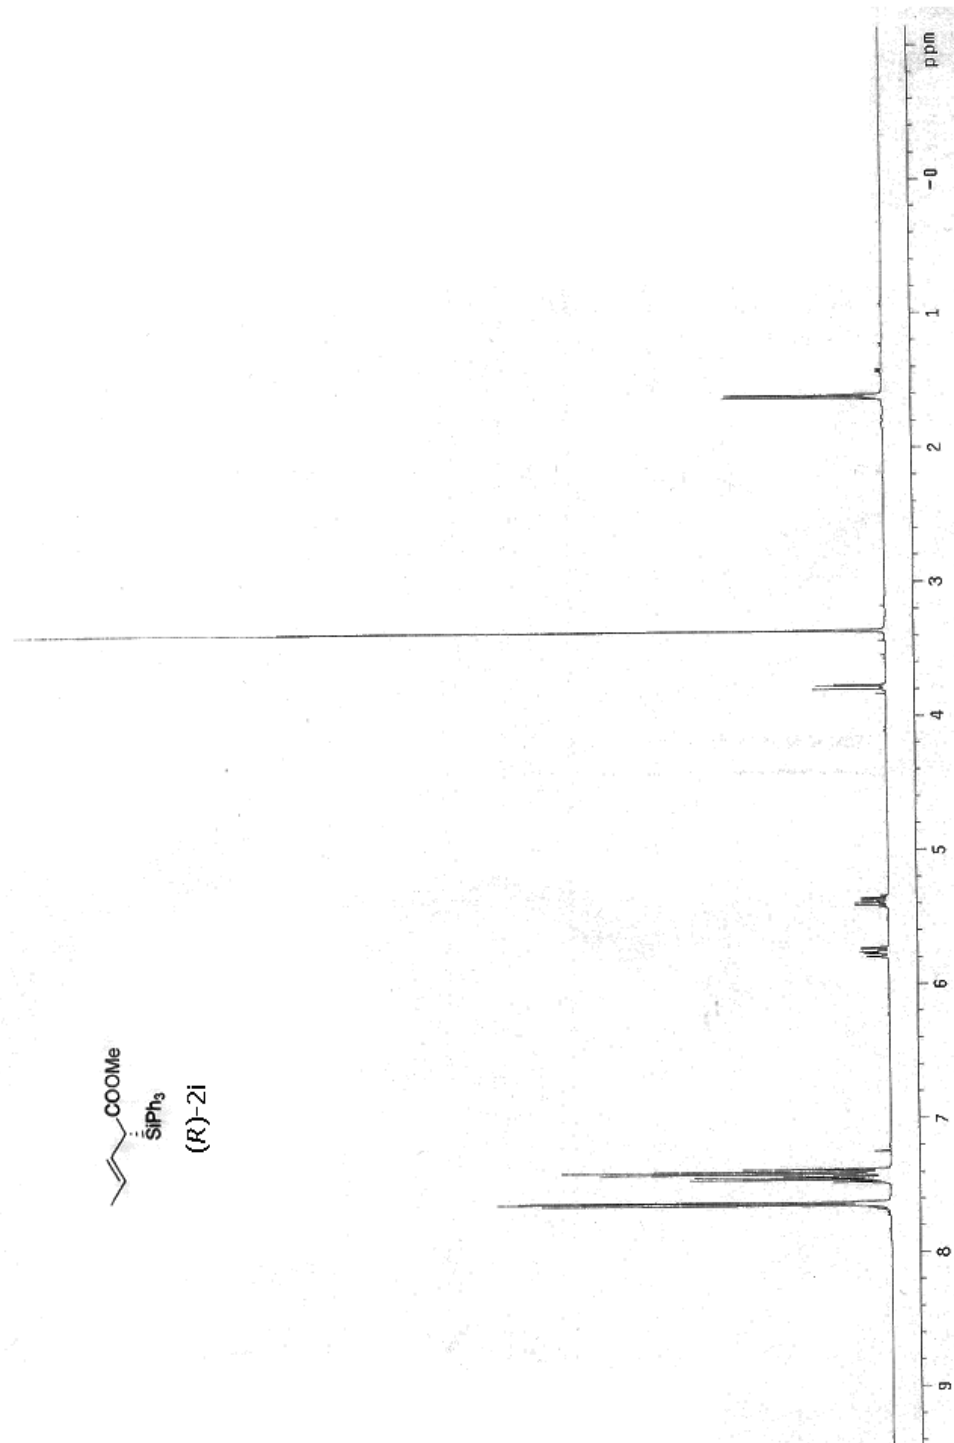

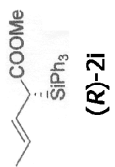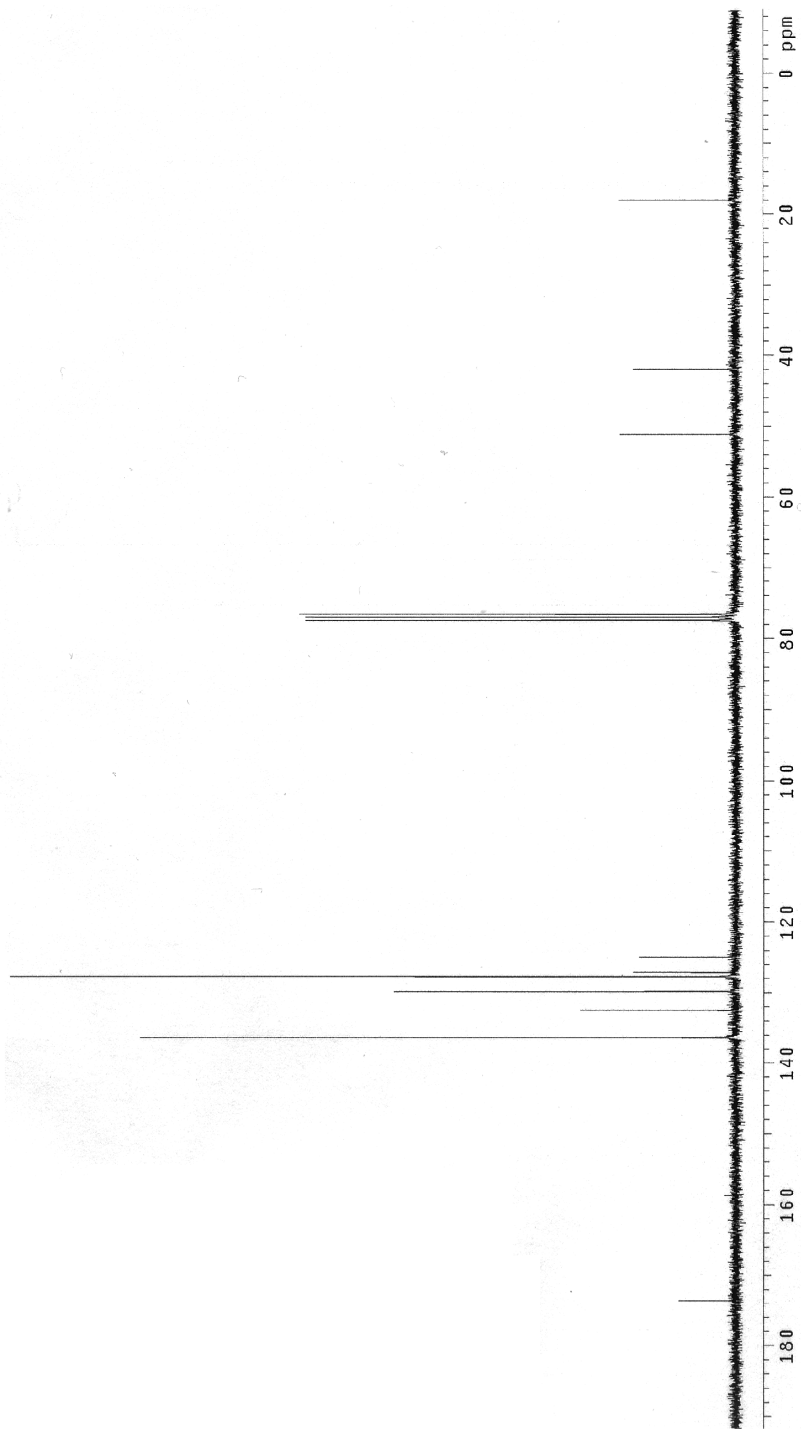

Sample: tms  
Sample ID: s\_43\_05  
File: home\w1k\p1\VA100\jasonwu\20050821\tms\_Proton\_01.fid  
Pulse Sequence: szpu1

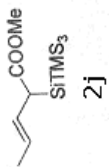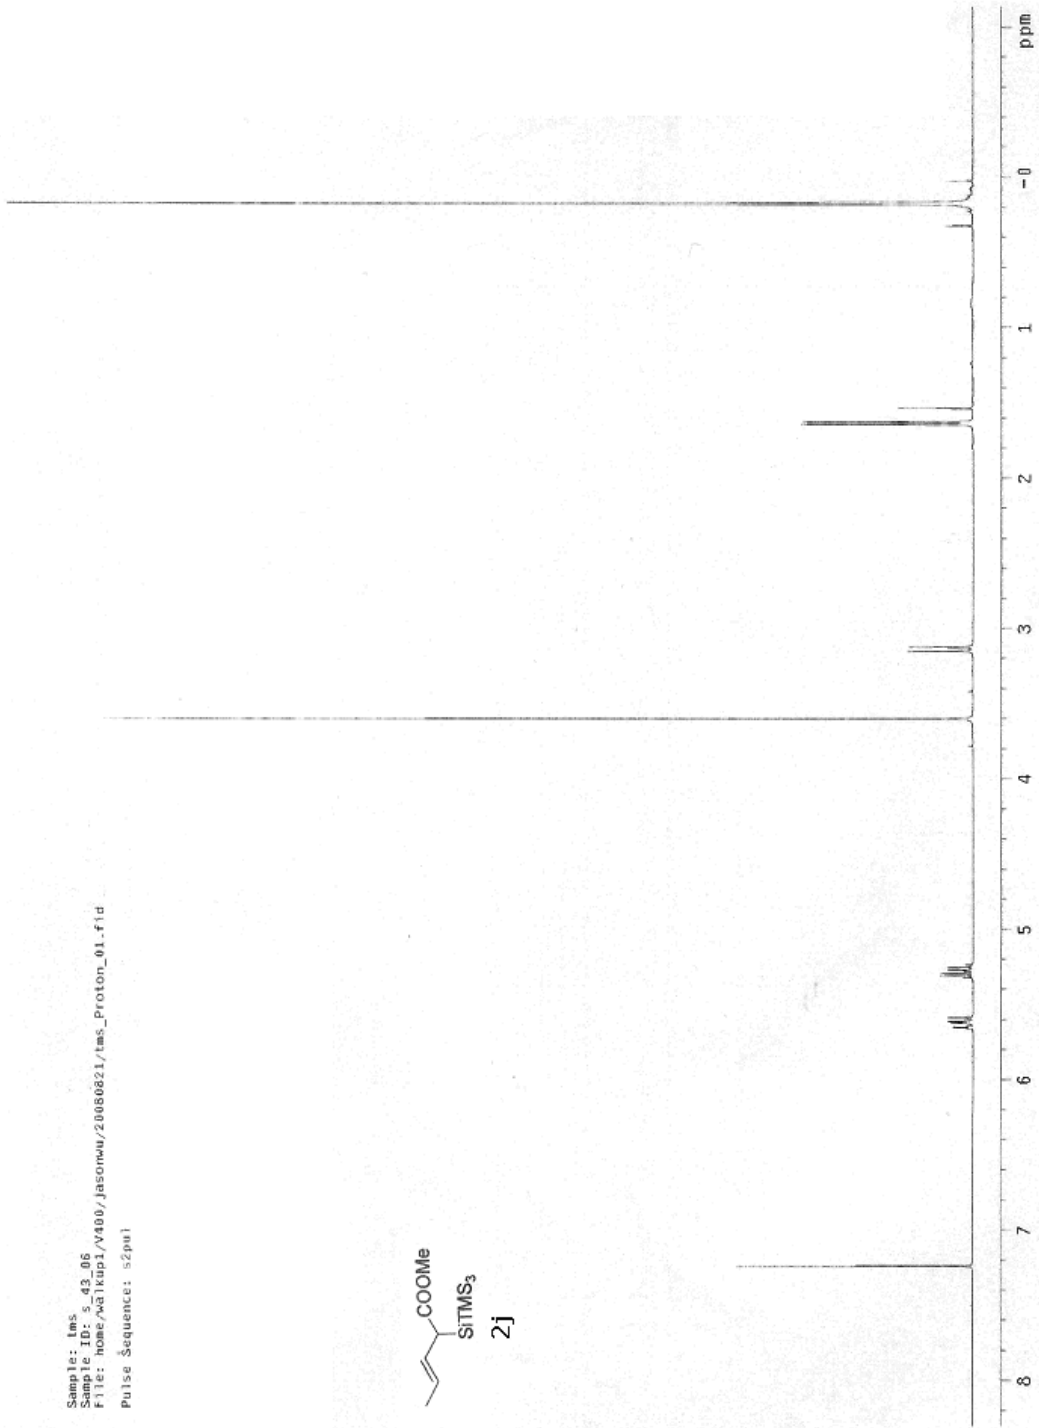

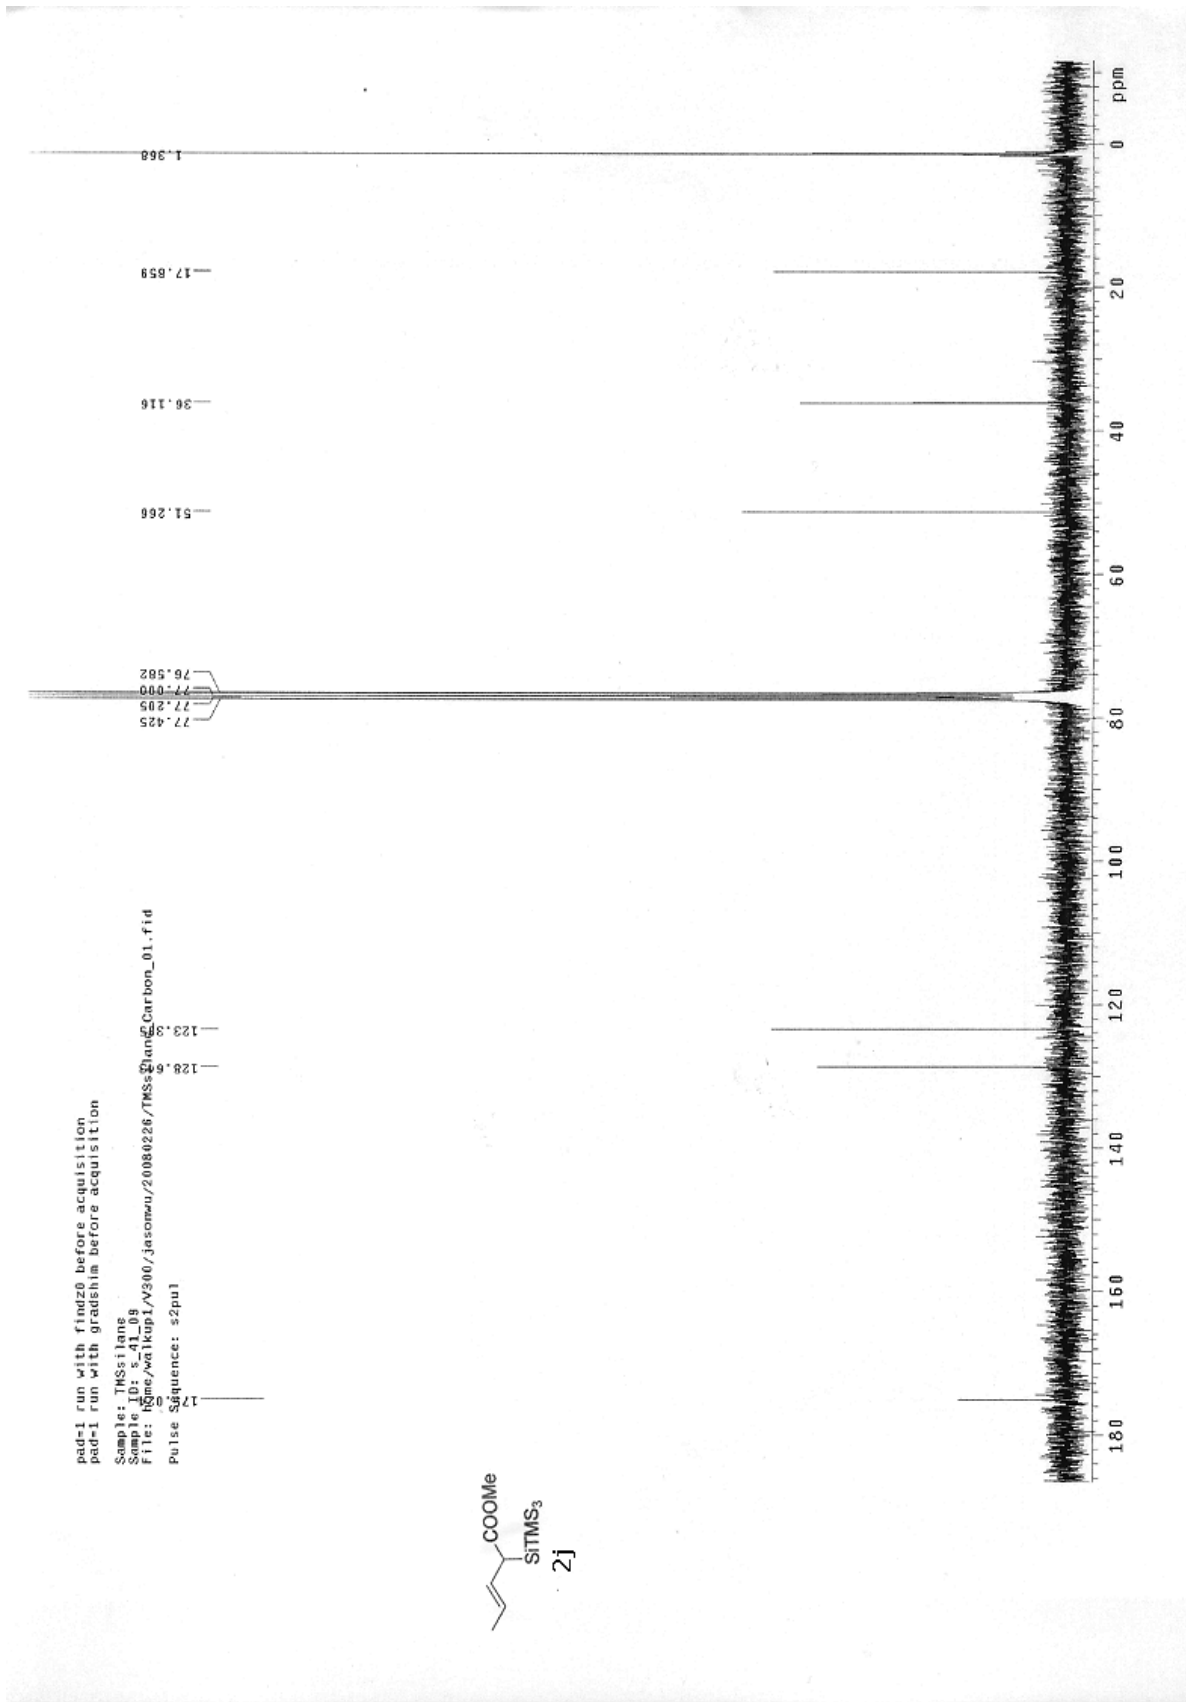

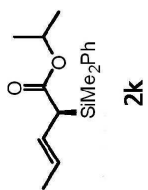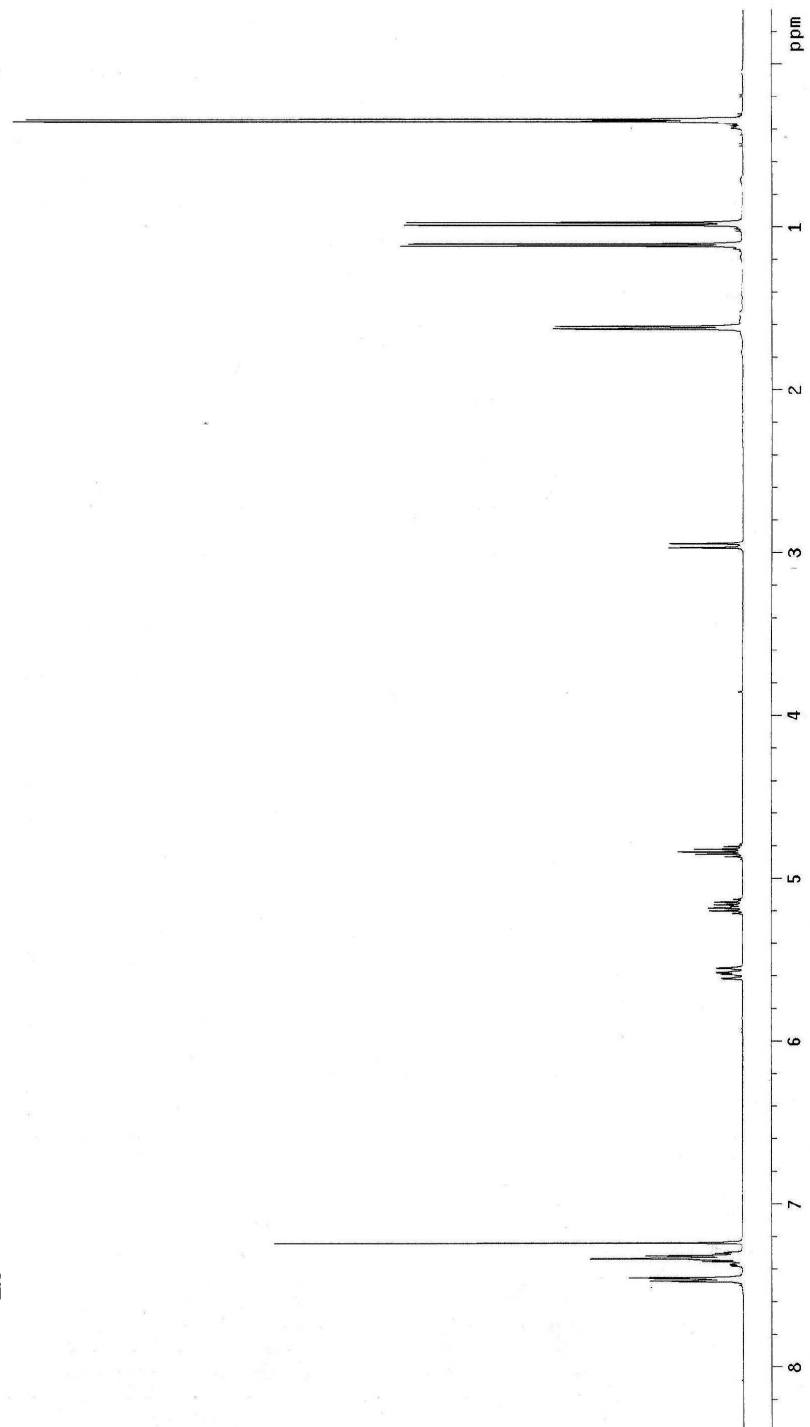

pad=1 run with findz0 before acquisition  
pad=1 run with gradshim before acquisition

Sample: Isopropyl  
Sample ID: S\_33\_04  
File: home/retkdp1/V300/Jasomw/20080302/Isopropyl\_Carbon  
Pulse Sequence: s2pu1

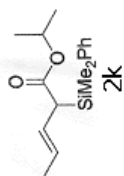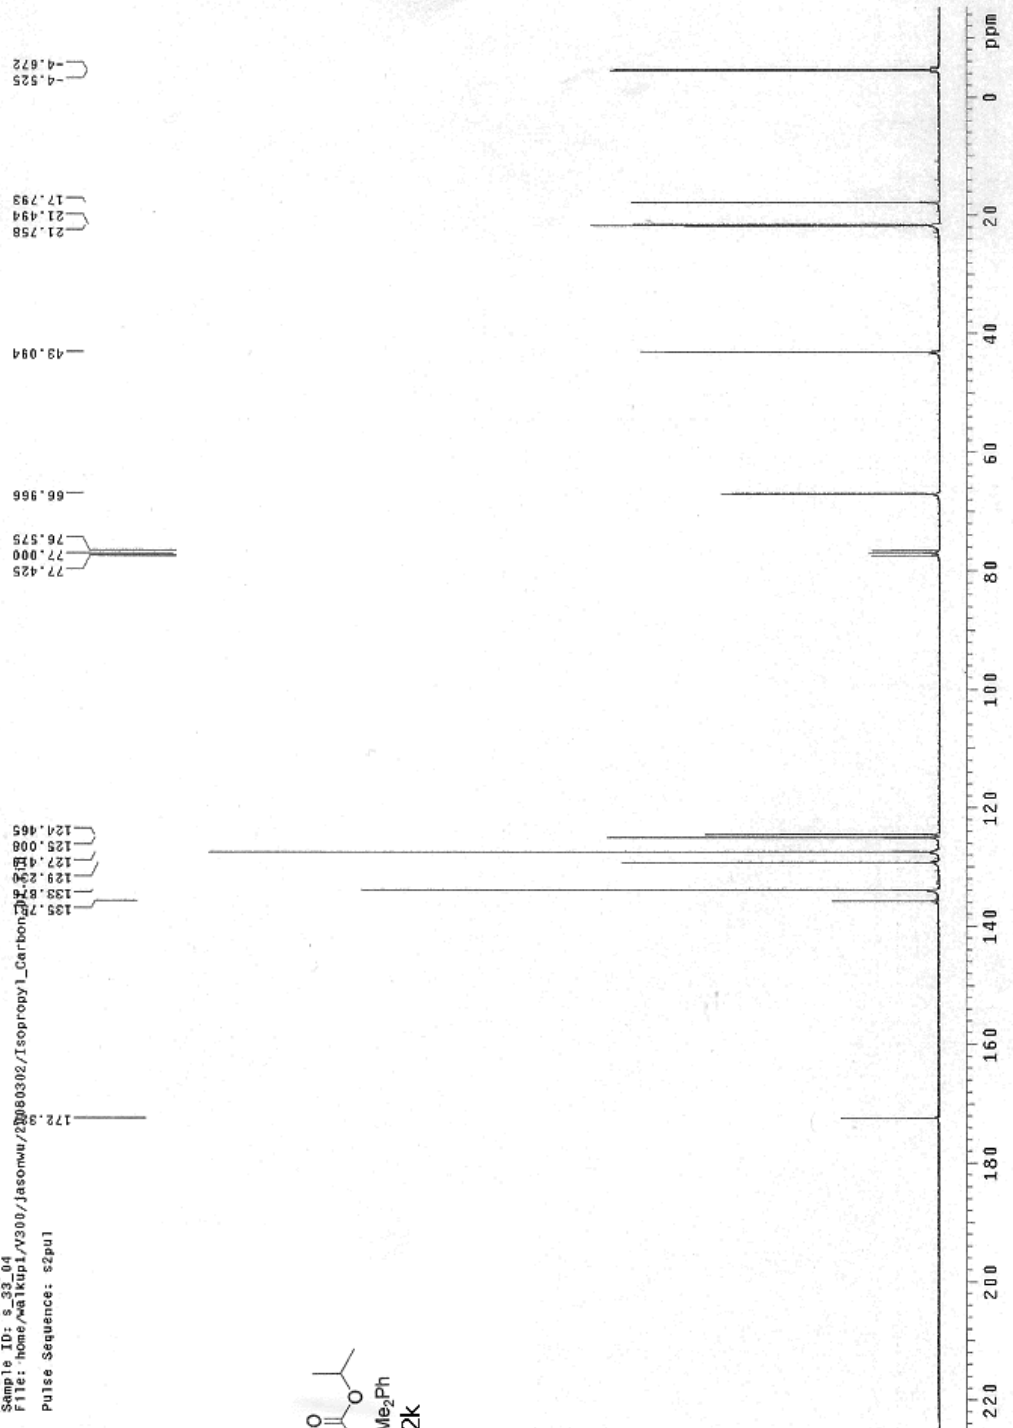

Sample: diclorolig  
Sample ID: s\_42\_02  
File: /home/va1kup3/vnmrSYS/data/jasonwu/20100125/diclorolig\_Proton\_01.fid  
Pulse Sequence: s2pu1

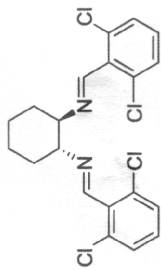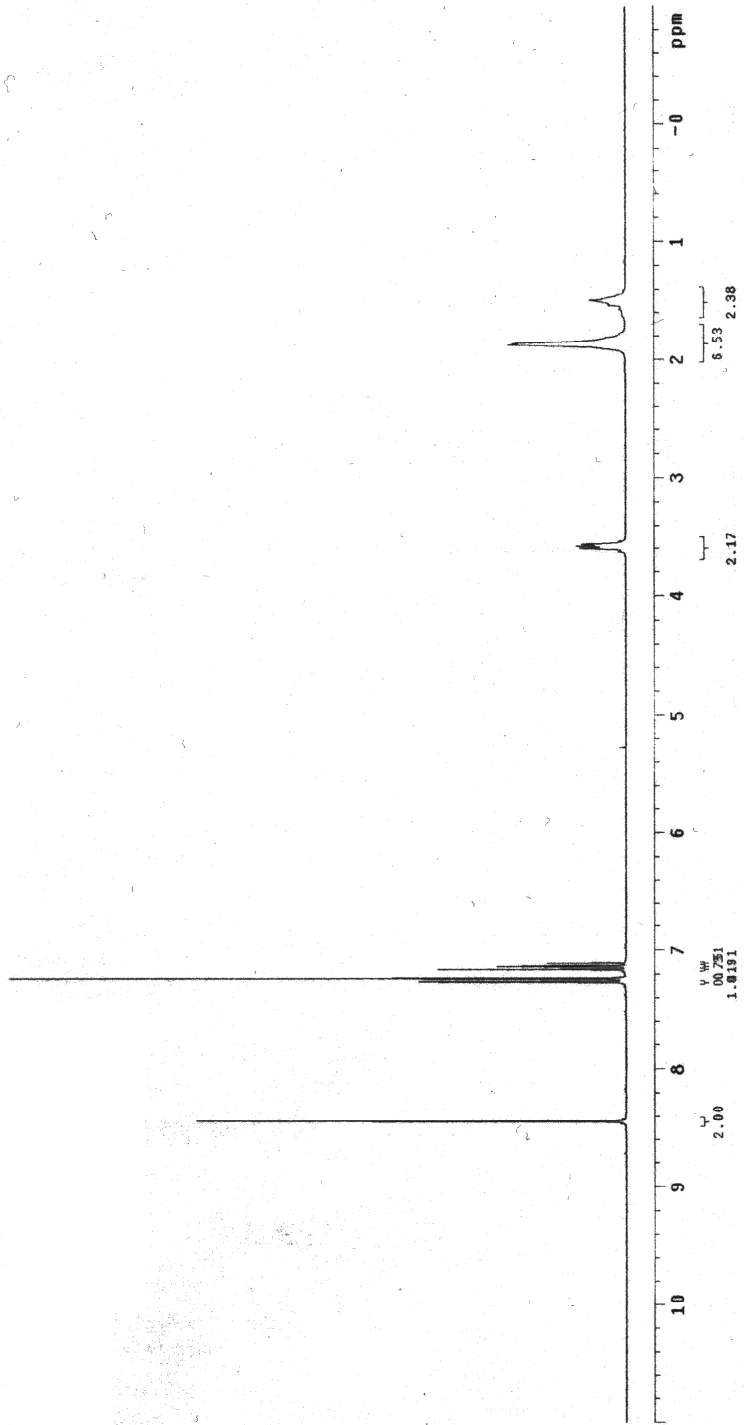



Sample: sma1  
Sample ID: s\_42\_04  
File: /home/wa1kep3/vnmr/20100126/sma1\_carbon\_01.fid  
Pulse Sequence: s2pu1

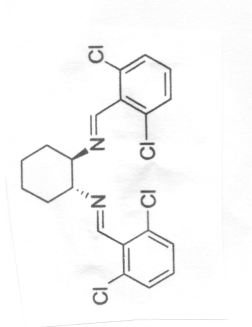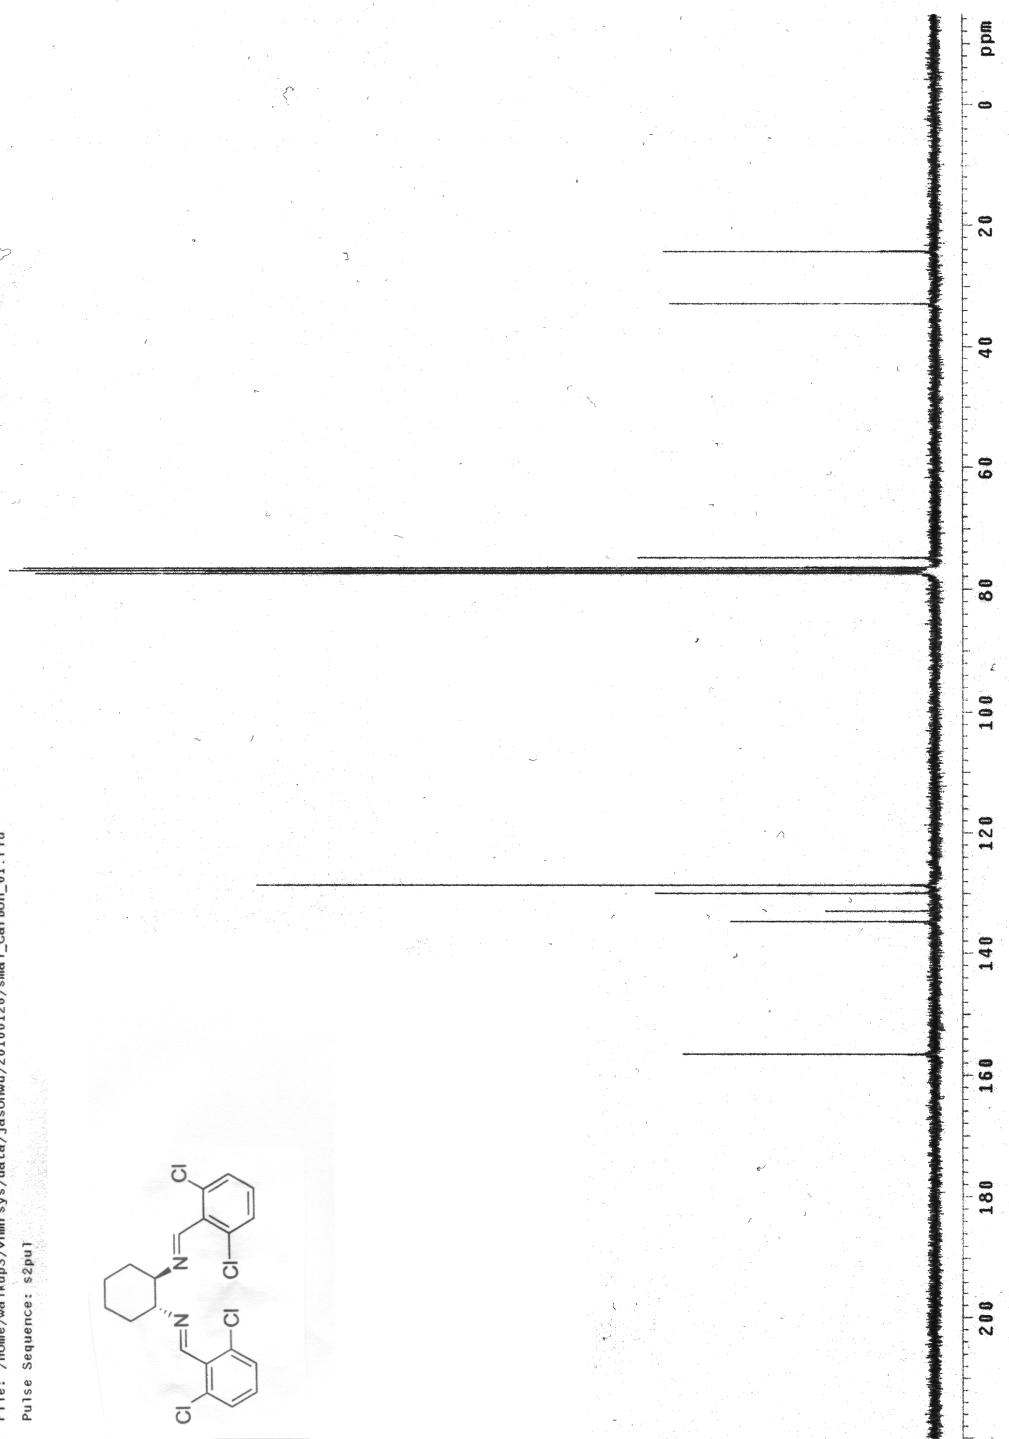

Sample: C12H2511g  
Sample ID: s\_40\_04  
File: /home/waikup3/vnmrSYS/data/jasonwu/20100125/C12H2511g\_Proton\_01.fid  
Pulse Sequence: s2pu1

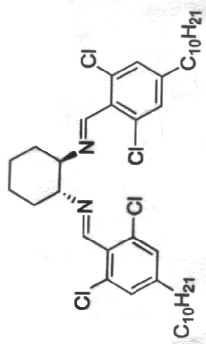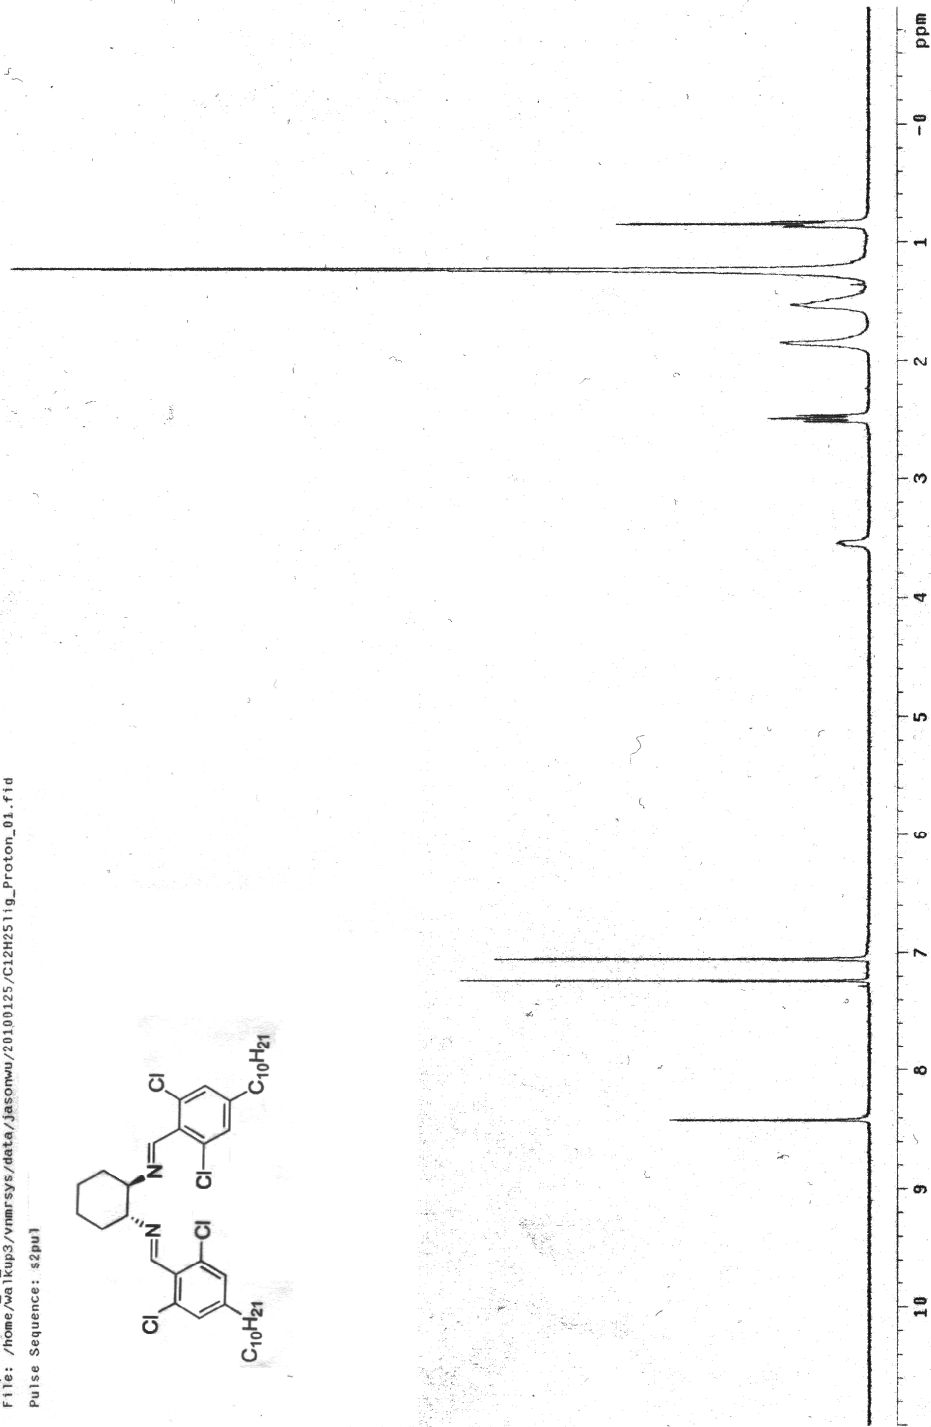

Sample: C12H2511g  
Scan #: 10; 40.05  
File: /home/walkeup3/vnmr/sys/data/jasonwu/20100126/C12H2511g\_Carbon\_01.fid  
Pulse Sequence: s2pr1

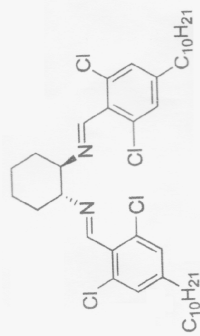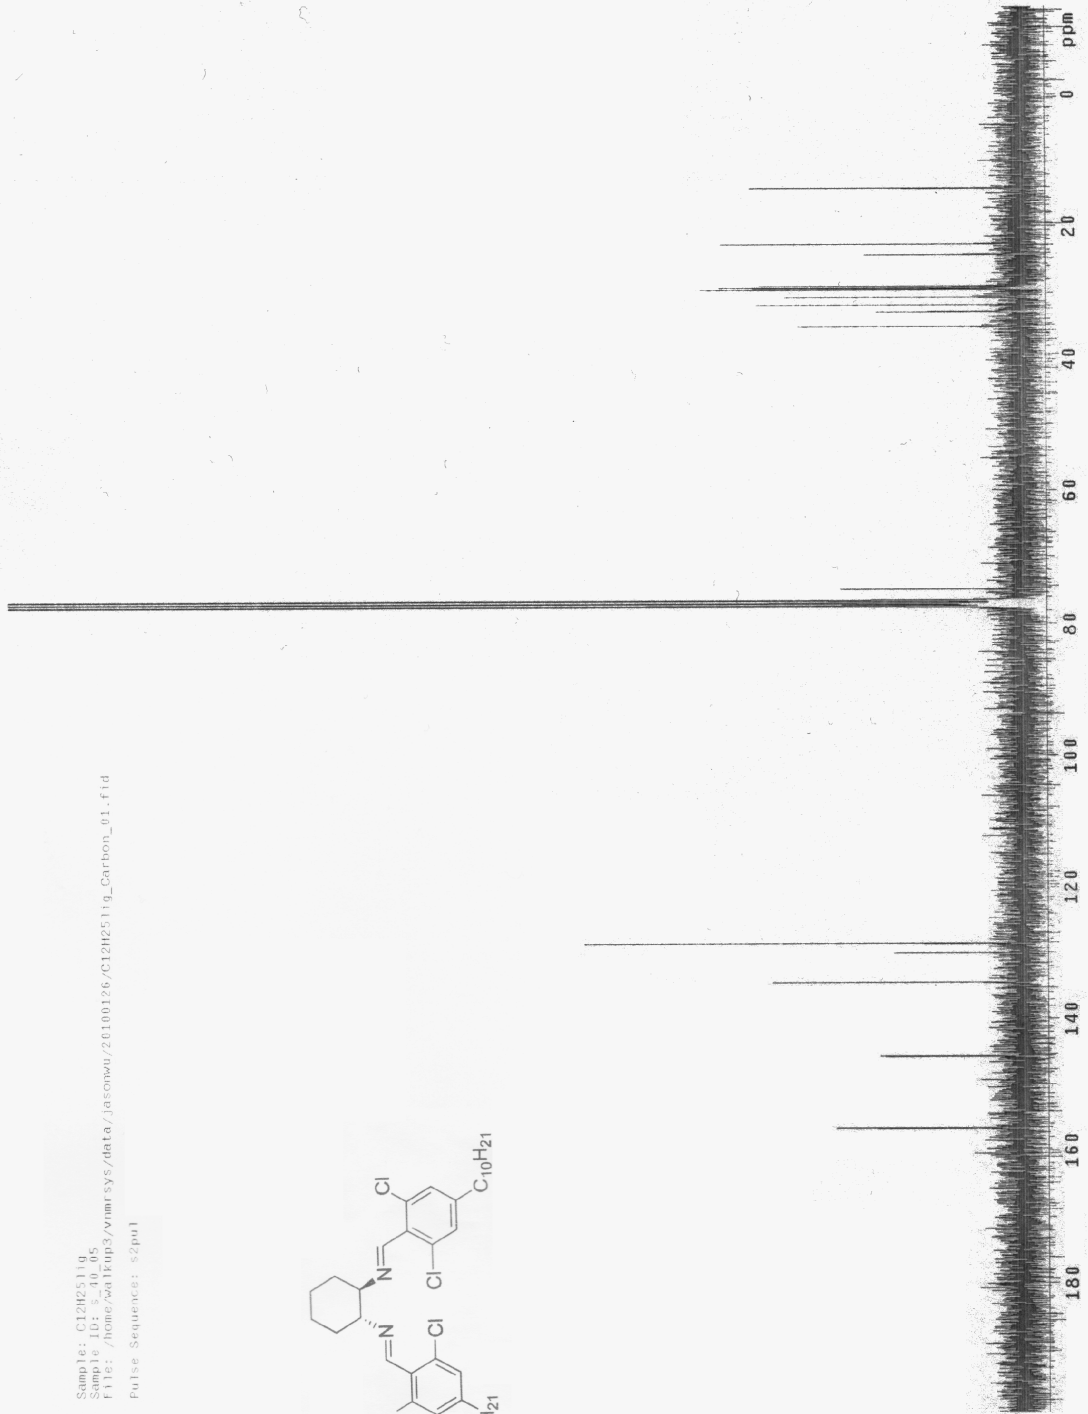

pad1 run with gradshim before acquisition

Sample: phester  
Sample ID: s\_56\_03  
File: home\Waikup1\MS00\jasonwu\20080920\phester\_Carbon\_01.f1d  
Pulse Sequence: s2pu1

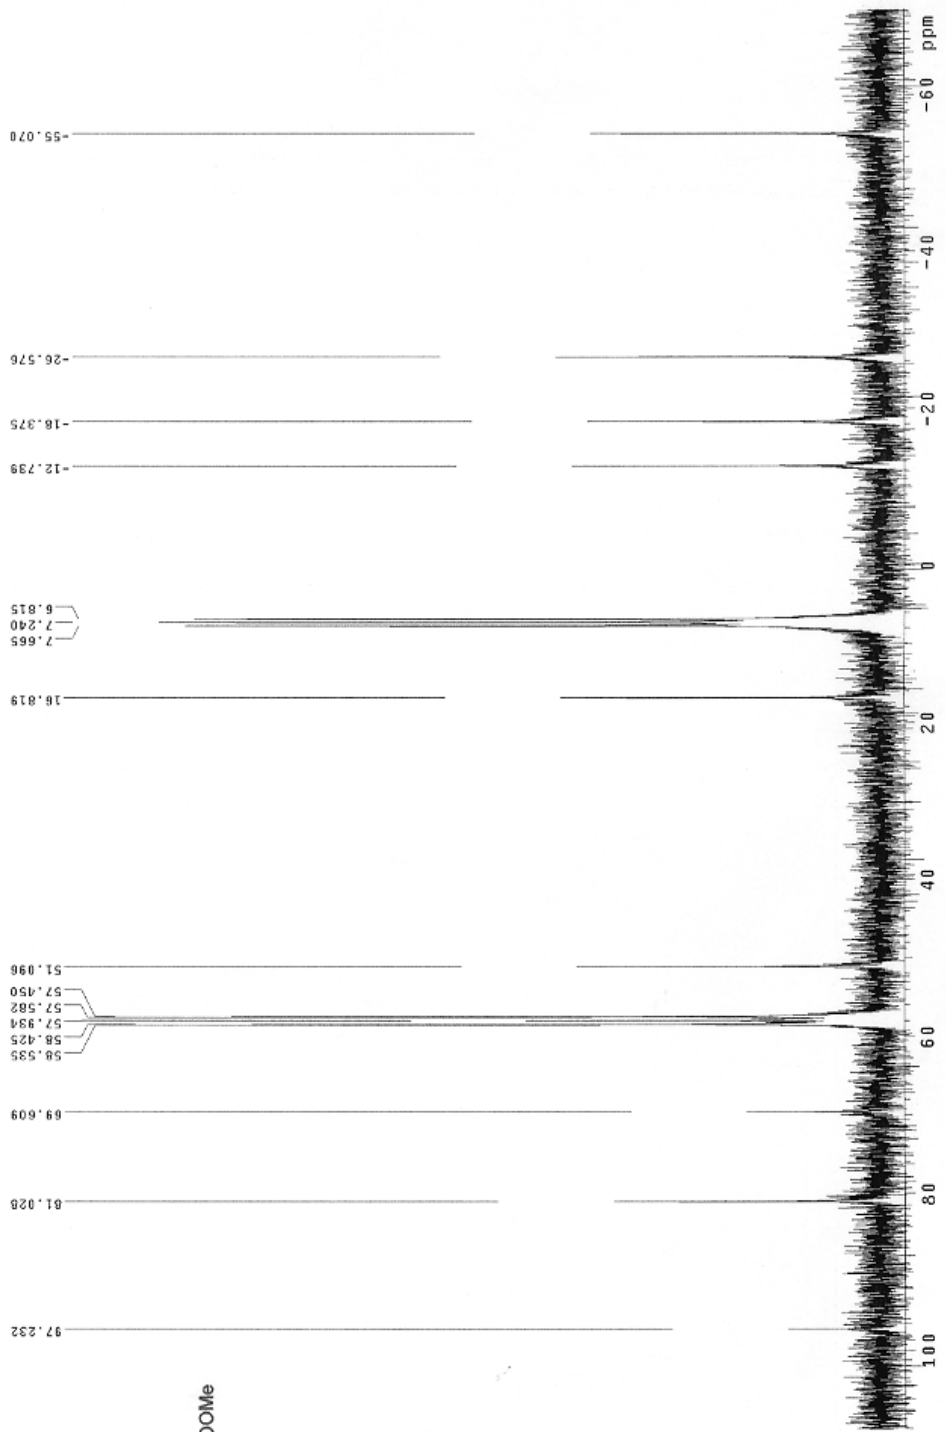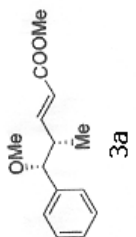

pad1 run with gradshim before acquisition  
Sample: phester  
Sample ID: s\_56\_03  
File: home/waikup1/V300/jasonwu/20080920/phester\_Carbon\_01.f1d  
Pulse Sequence: s2pu1

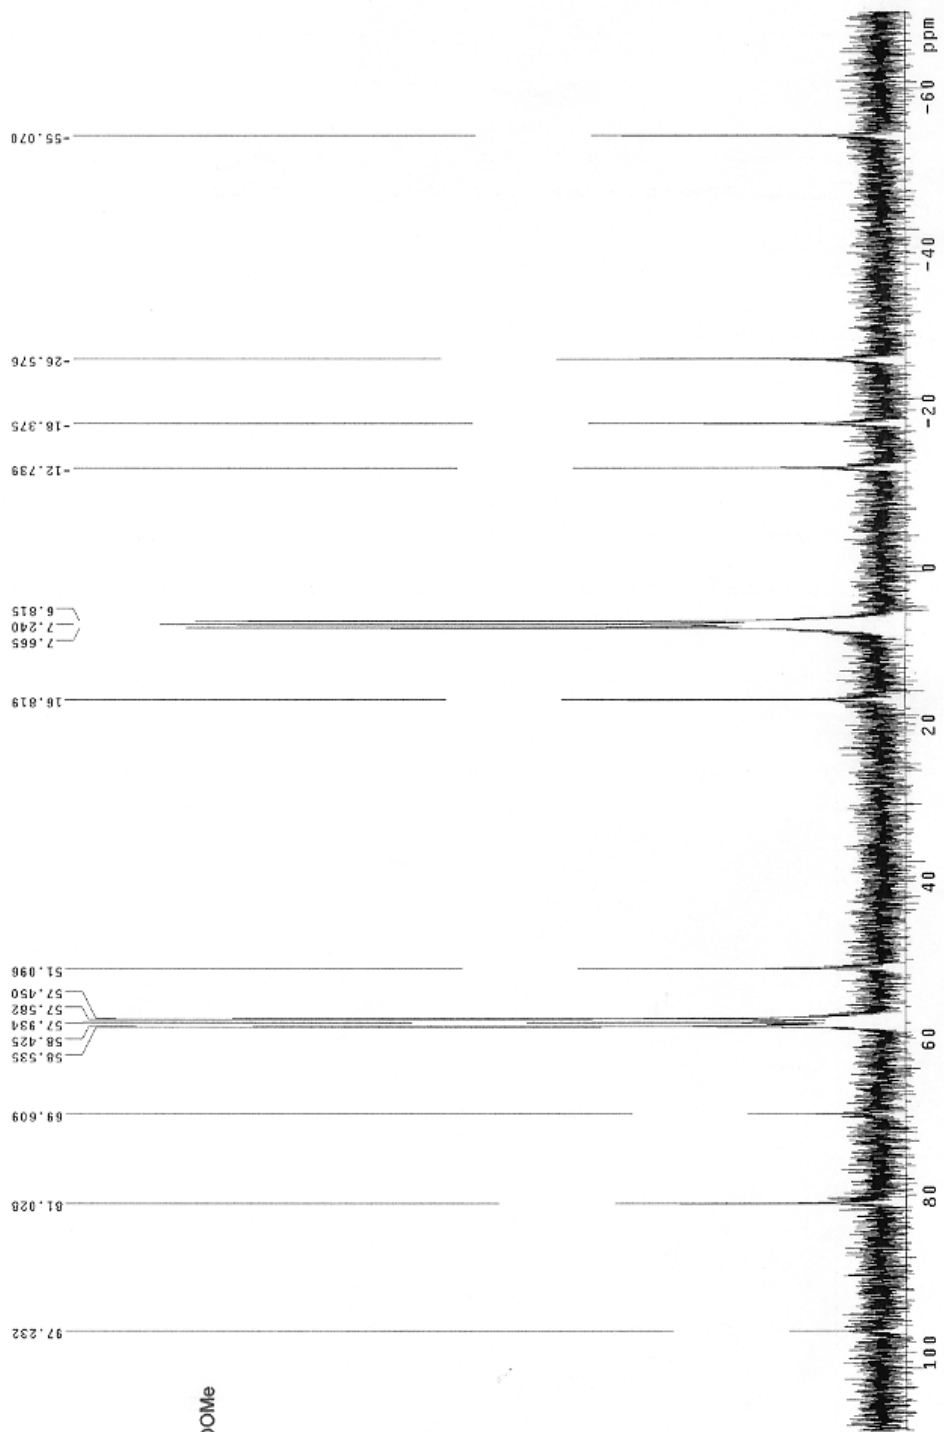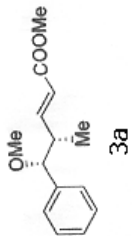

Sample: toluene  
Sample ID: S\_43\_01  
File: home/walkup1/V400/jasonwu/20080423/toluene Proton 01.fid  
Pulse Sequence: szpu1

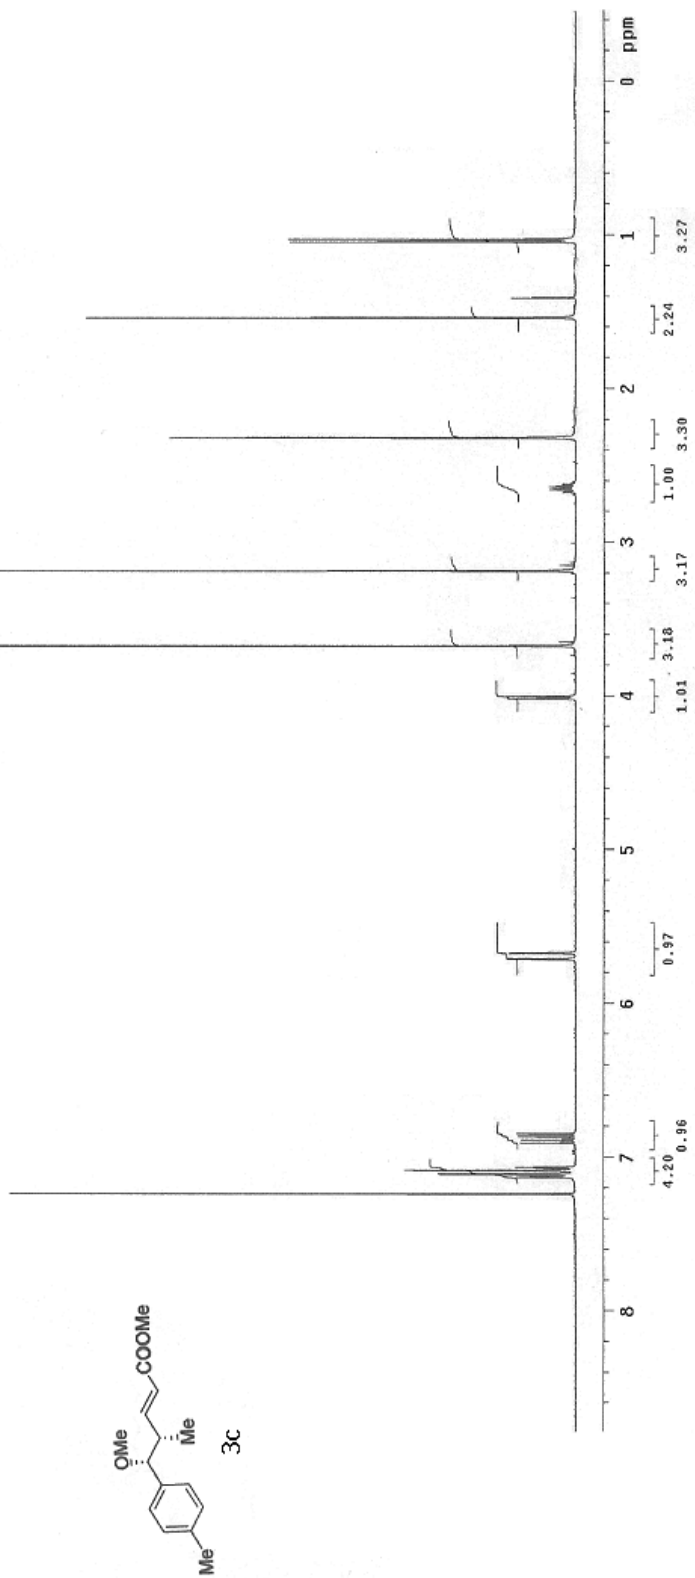

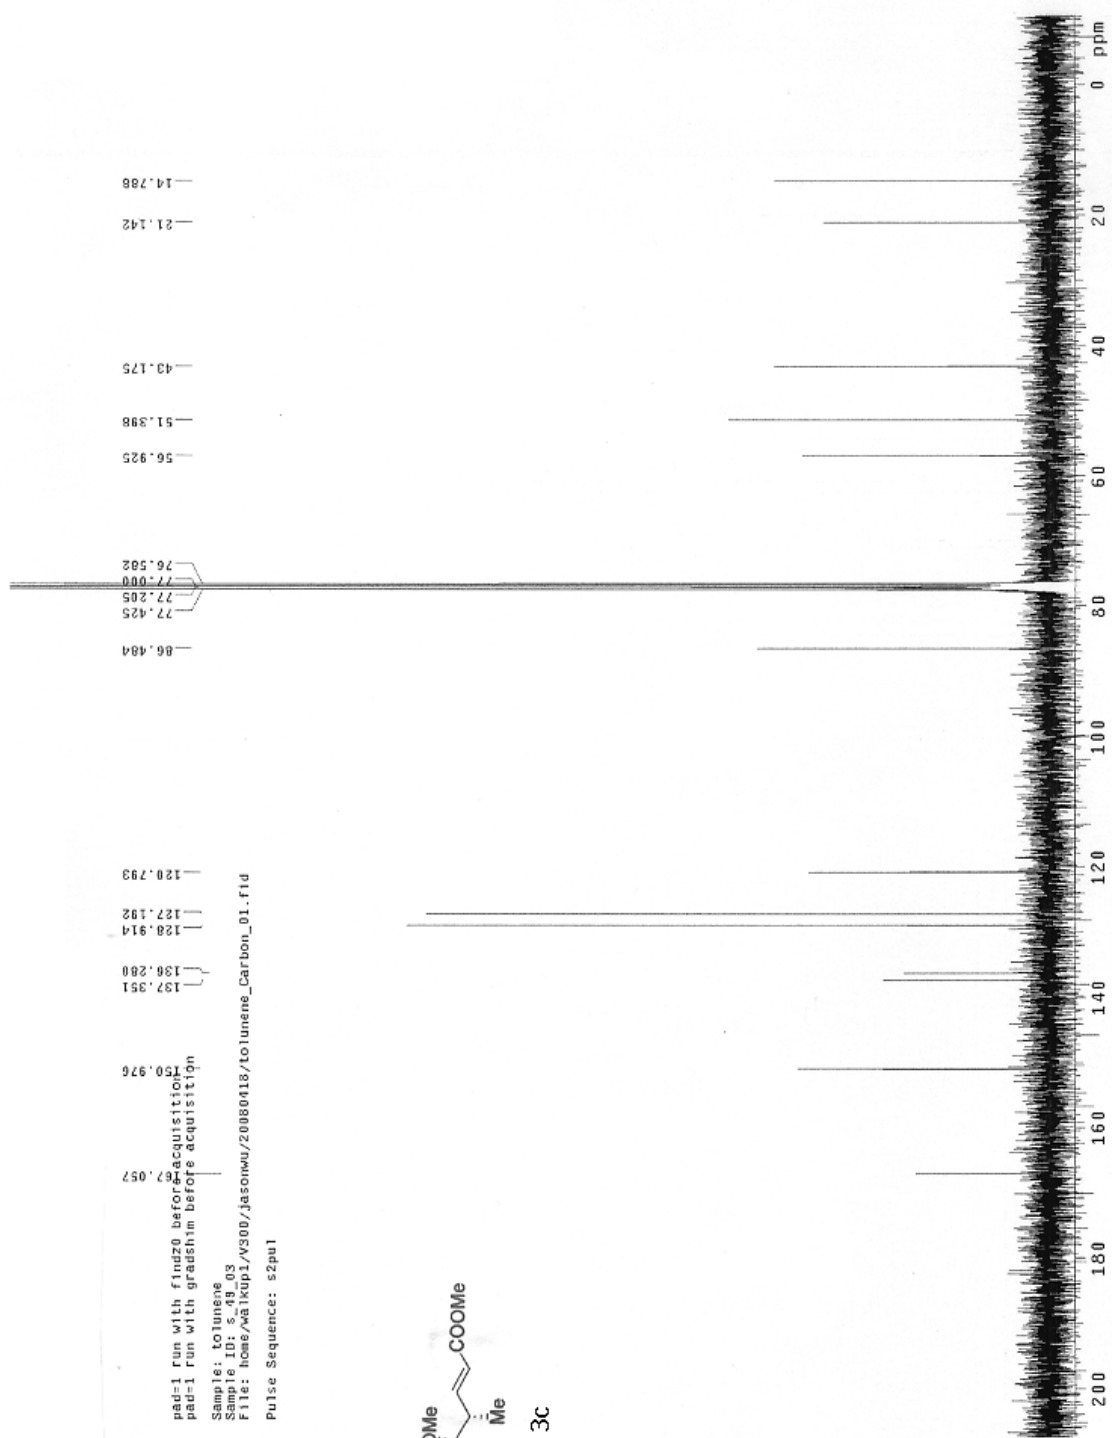

Sample: twobmethoxester  
Sample ID: s\_47\_05  
File: home/waikup1/V400/jasonwu/20080603/twobmethoxester\_Proton\_01.fid  
Pulse Sequence: s2pu1

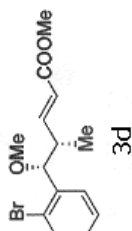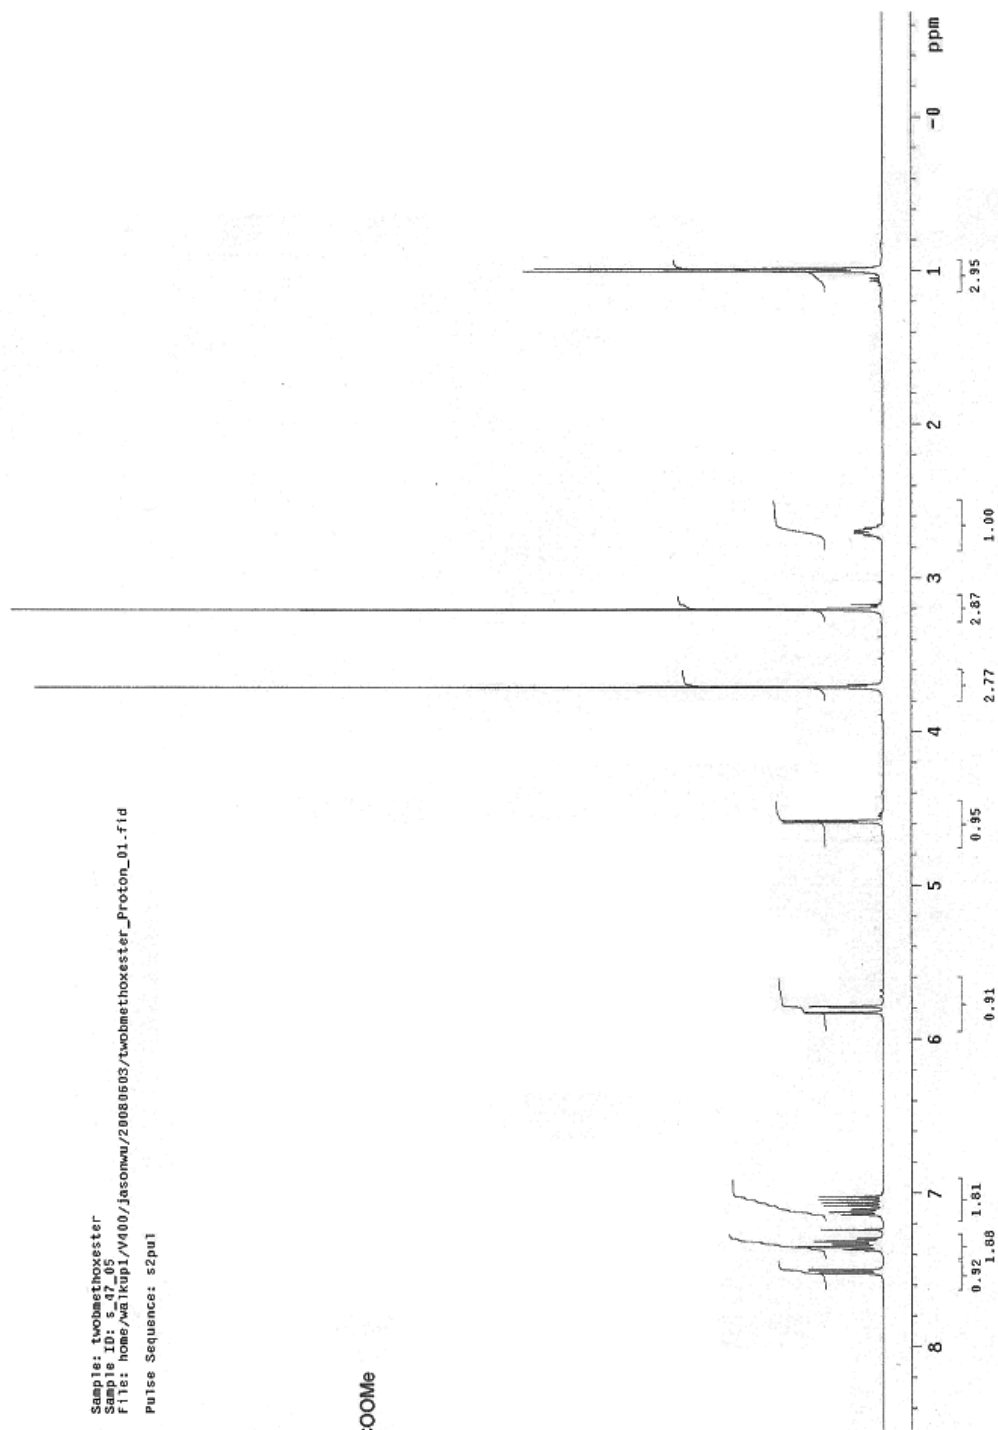



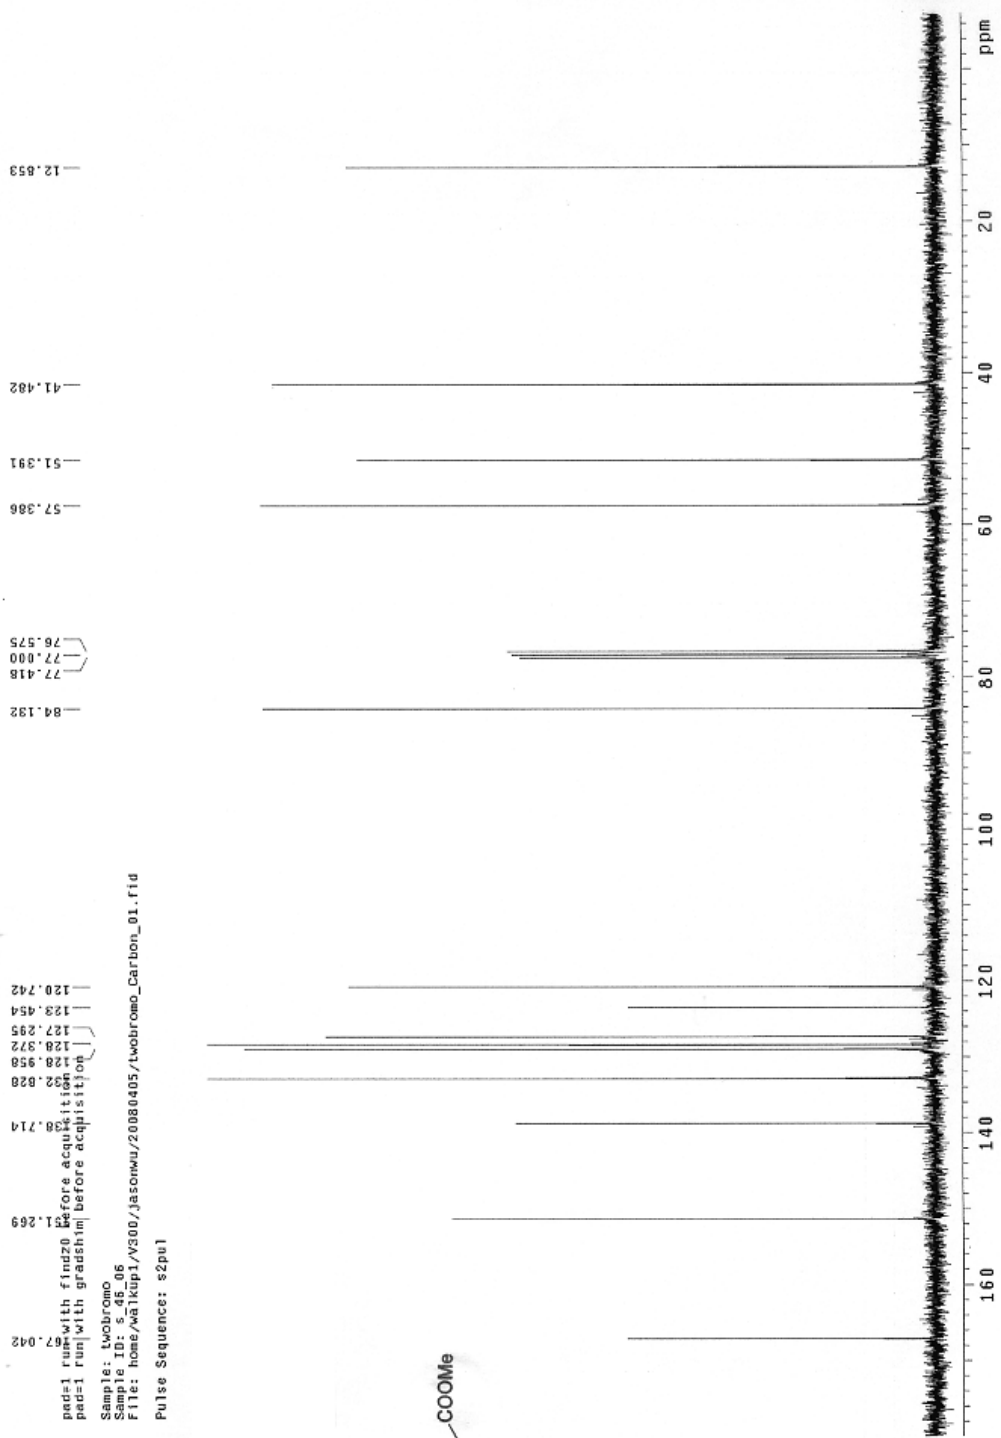

ped=1 run with findz0 before acquisition  
 ped=1 run with gradshim before acquisition  
 Sample: twobromo  
 Sample T: 300.2 K  
 File: home/wa1kup1/V300/jaschmu/20080405/twobromo\_carbon\_01.fid  
 Pulse Sequence: s2pu1

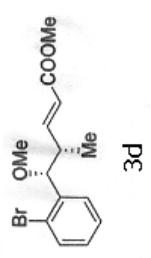

Sample: bromobottomsp  
Sample ID: S\_42\_05  
File: home\workup1\4400\jasonwu\20080226\bromobottomsp\_Proton\_01.fid  
Pulse Sequence: s2pu1

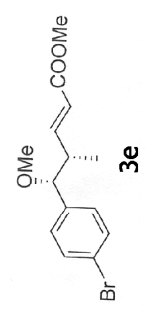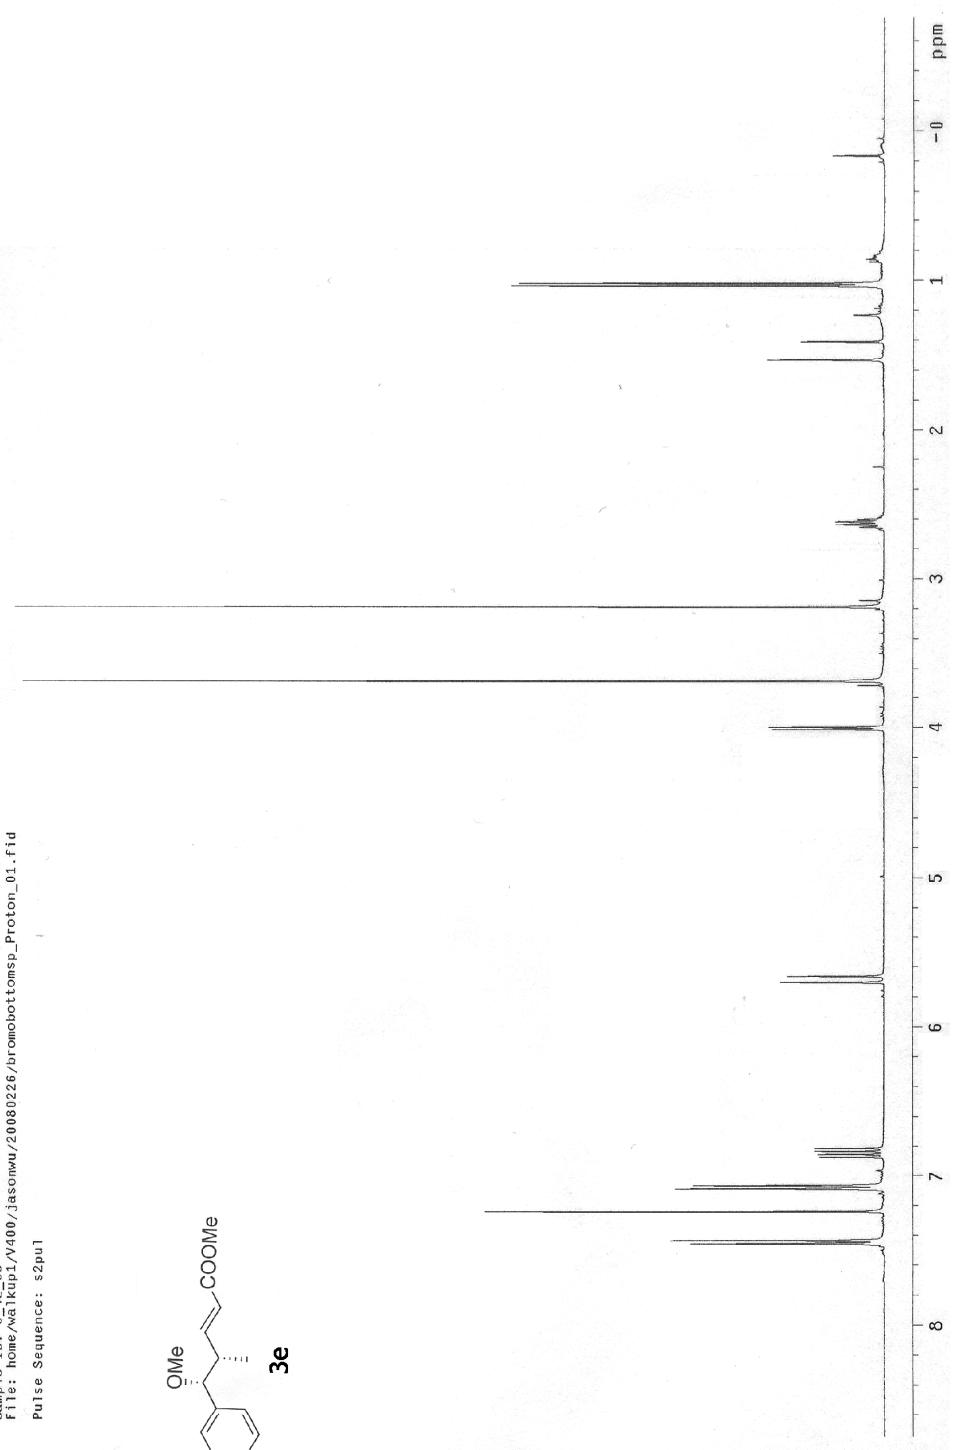

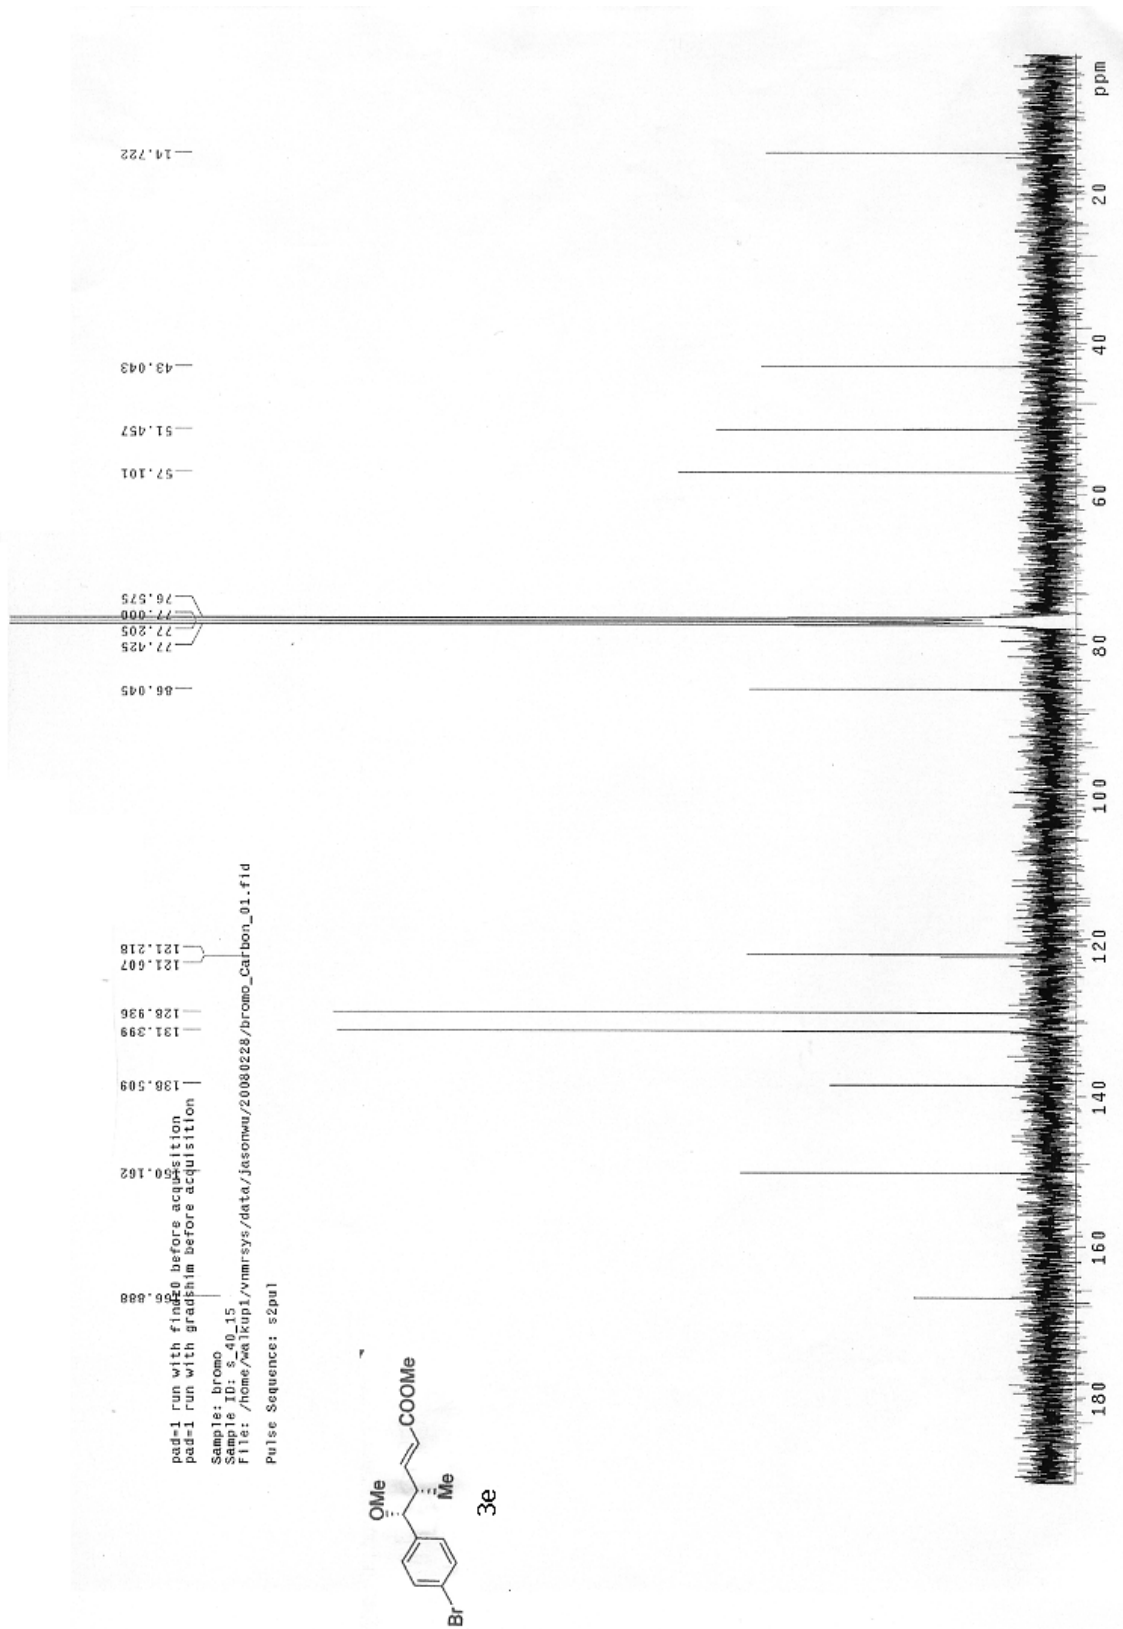

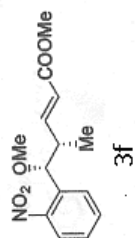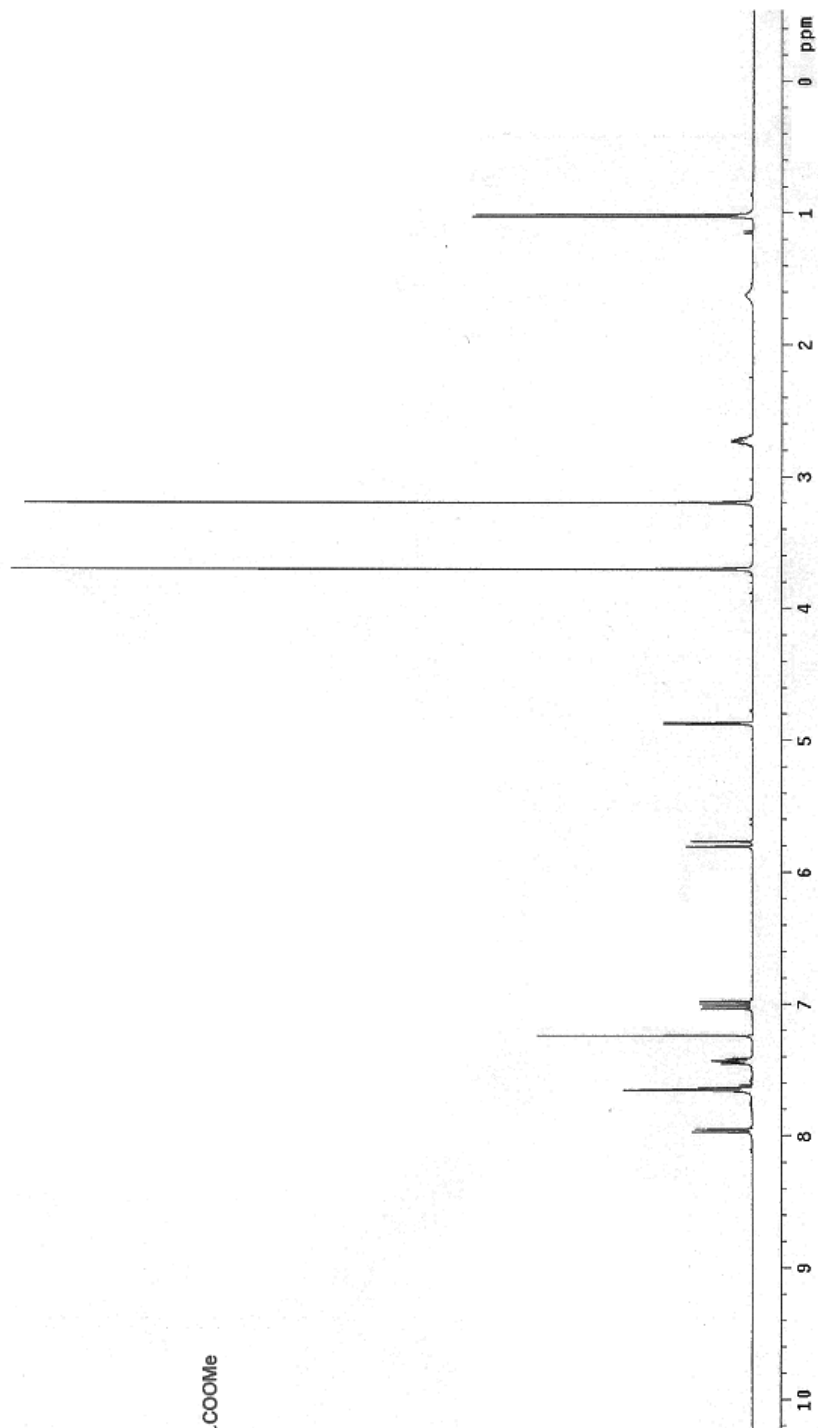

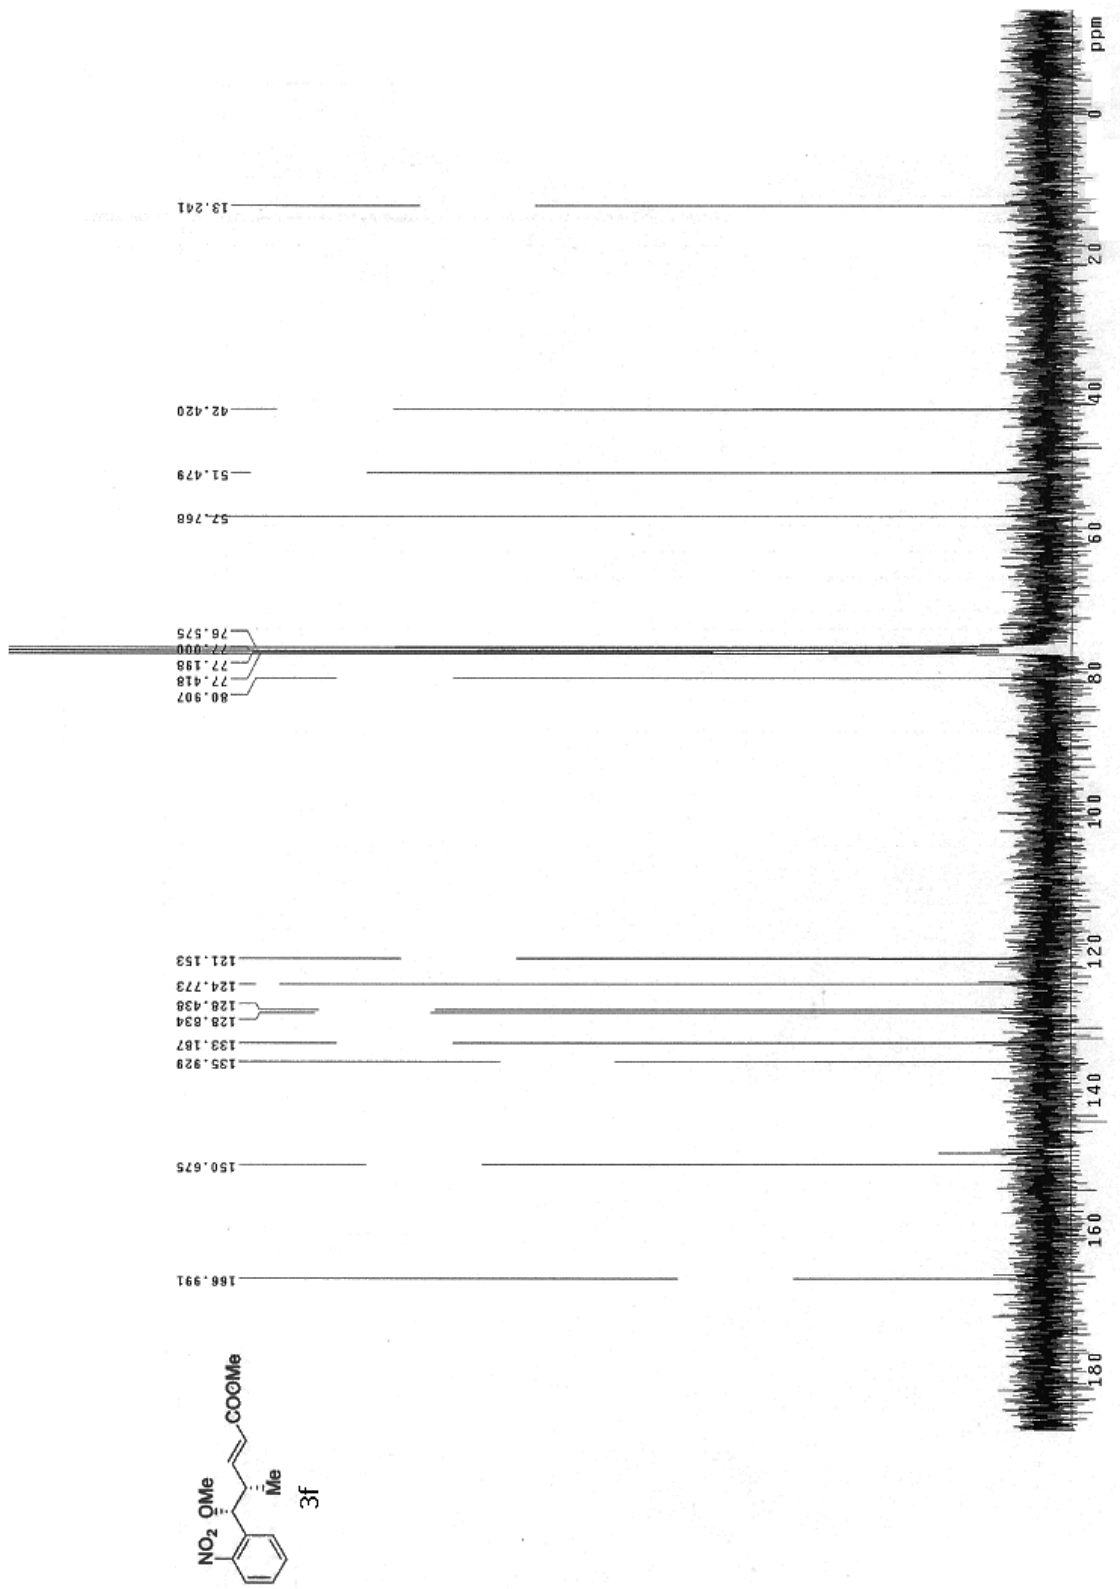

Sample: benzylethylester  
Sample ID: S\_210001  
F119: home/ndkhp1/V400/jasonmu/20080424/benzylethylester\_Proton\_01.fid  
Pulse Sequence: s2pu1

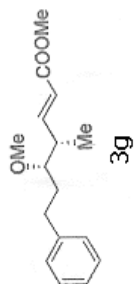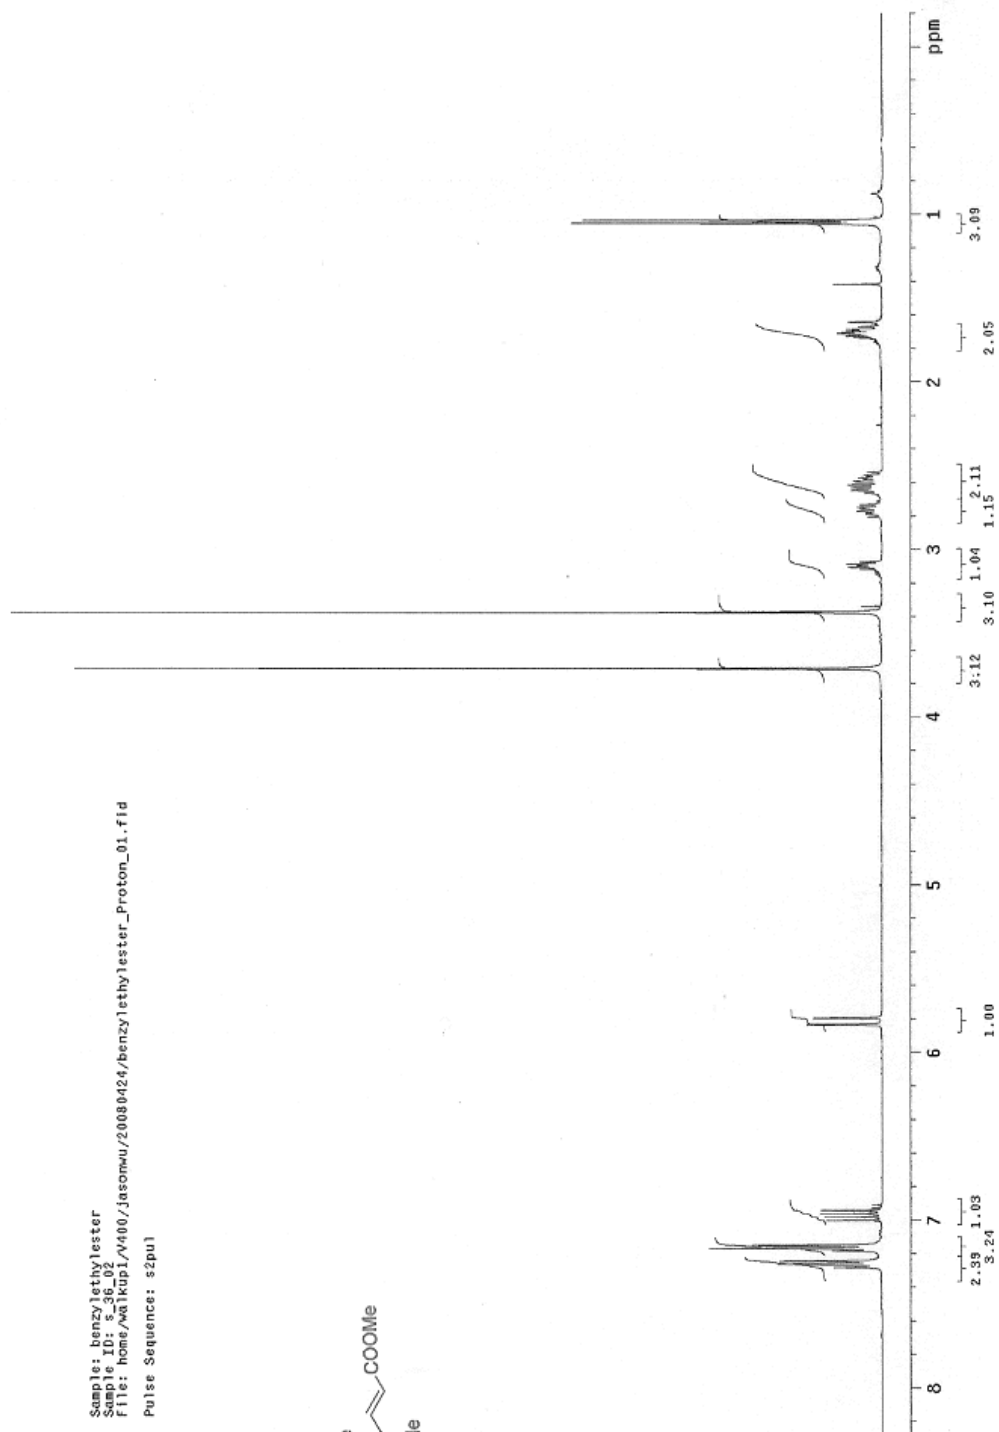

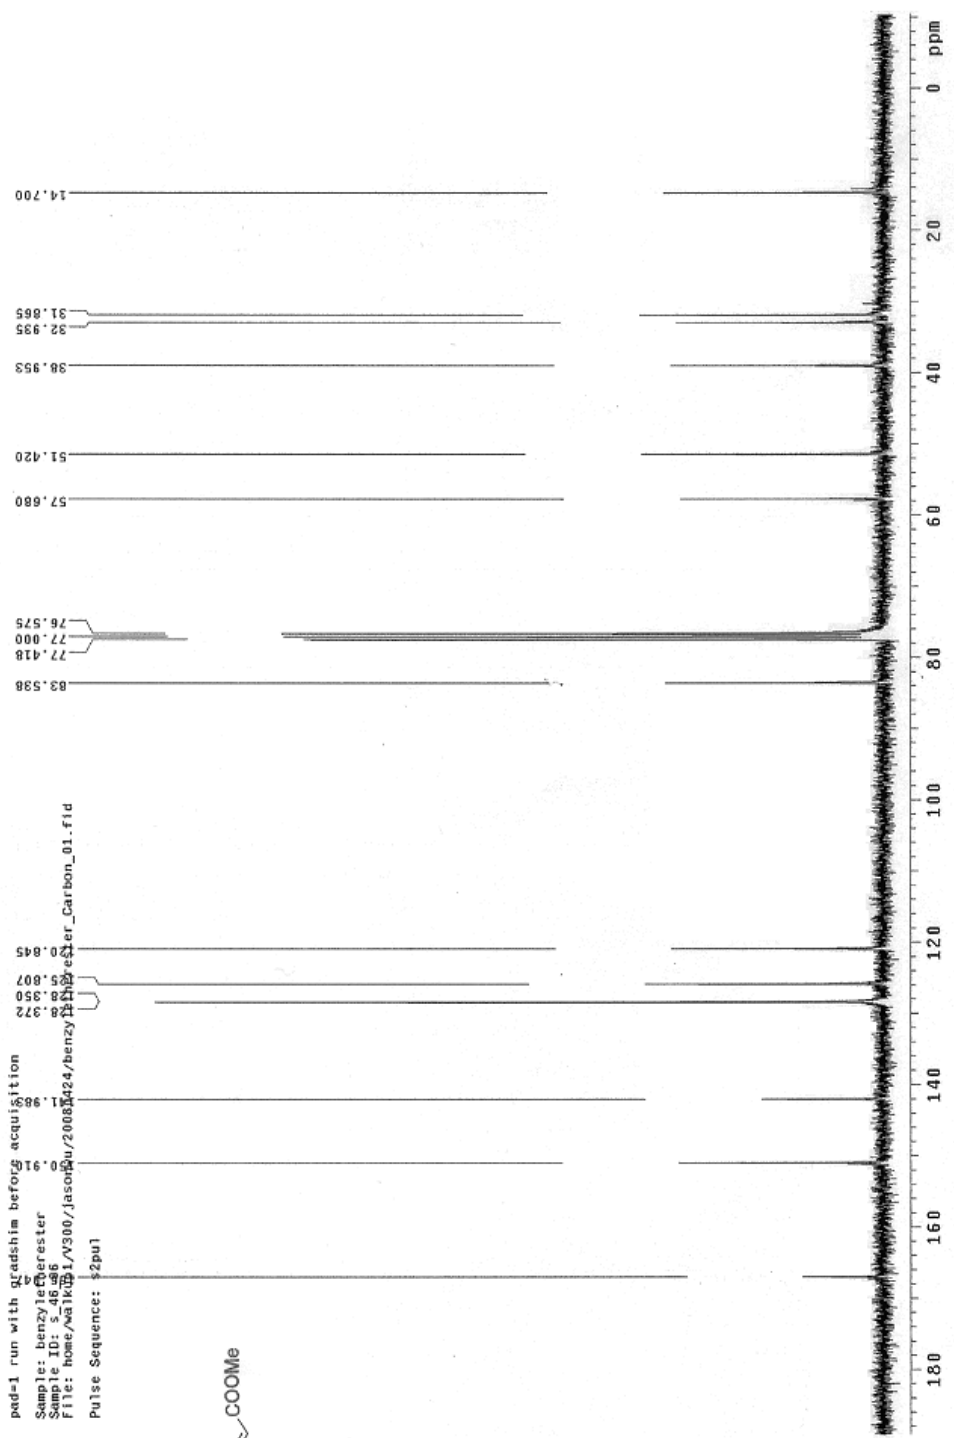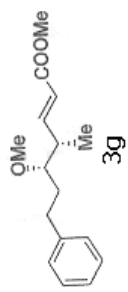

Sample: cyclop  
Sample ID: s\_29\_02  
File: home/walidup1/vs00/jasonwu/20080408/cyclop\_proton\_01.fid  
Pulse Sequence: s2pu1

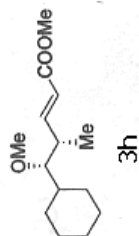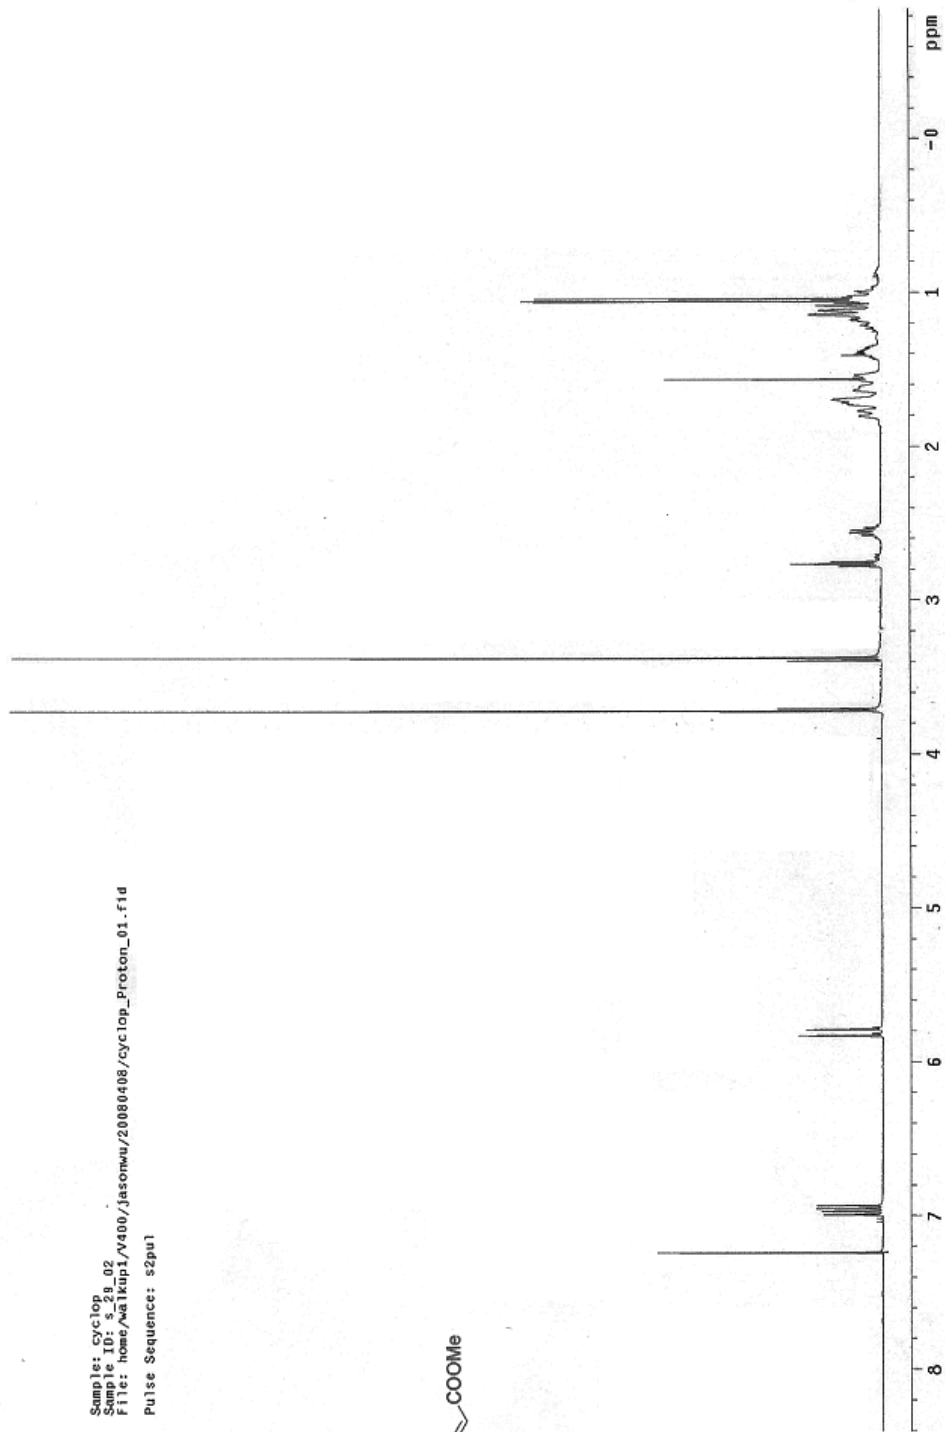



pad=1 run with findz0 before acquisition  
pad=1 run with gradshim before acquisition  
Sample: cyclo  
Sample ID: s\_46\_01  
File: home/walakupi/v300/jasonwu/20080410/cyclo\_carbon\_01.fid  
Pulse Sequence: s2pu1

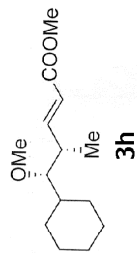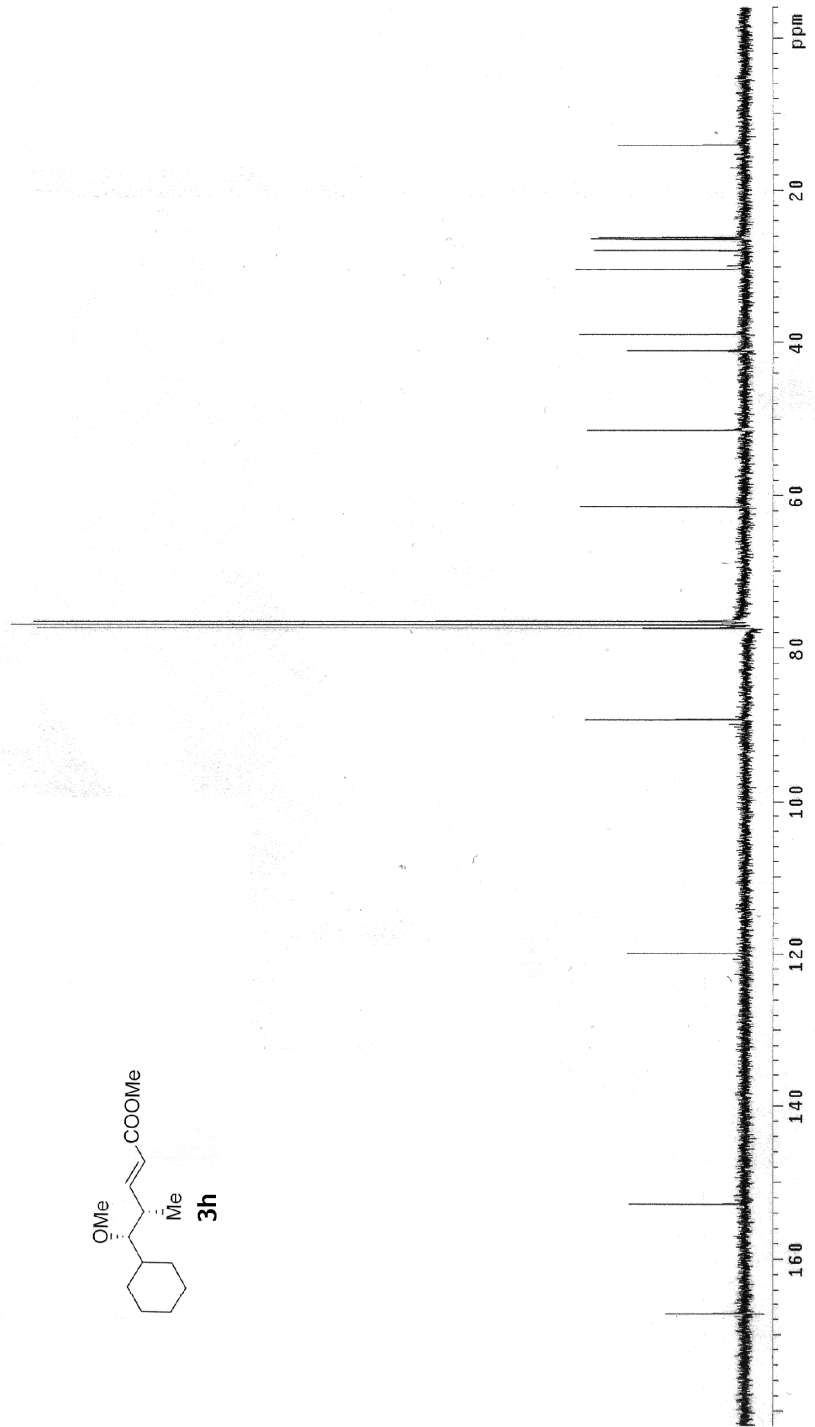

Sample: isobuty1  
Sample ID: s\_42\_18  
File: home/walkup1/V400/Jasonwu/20080415/isobuty1\_Proton\_01.fid  
Pulse Sequence: s2pu1

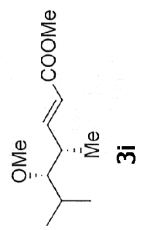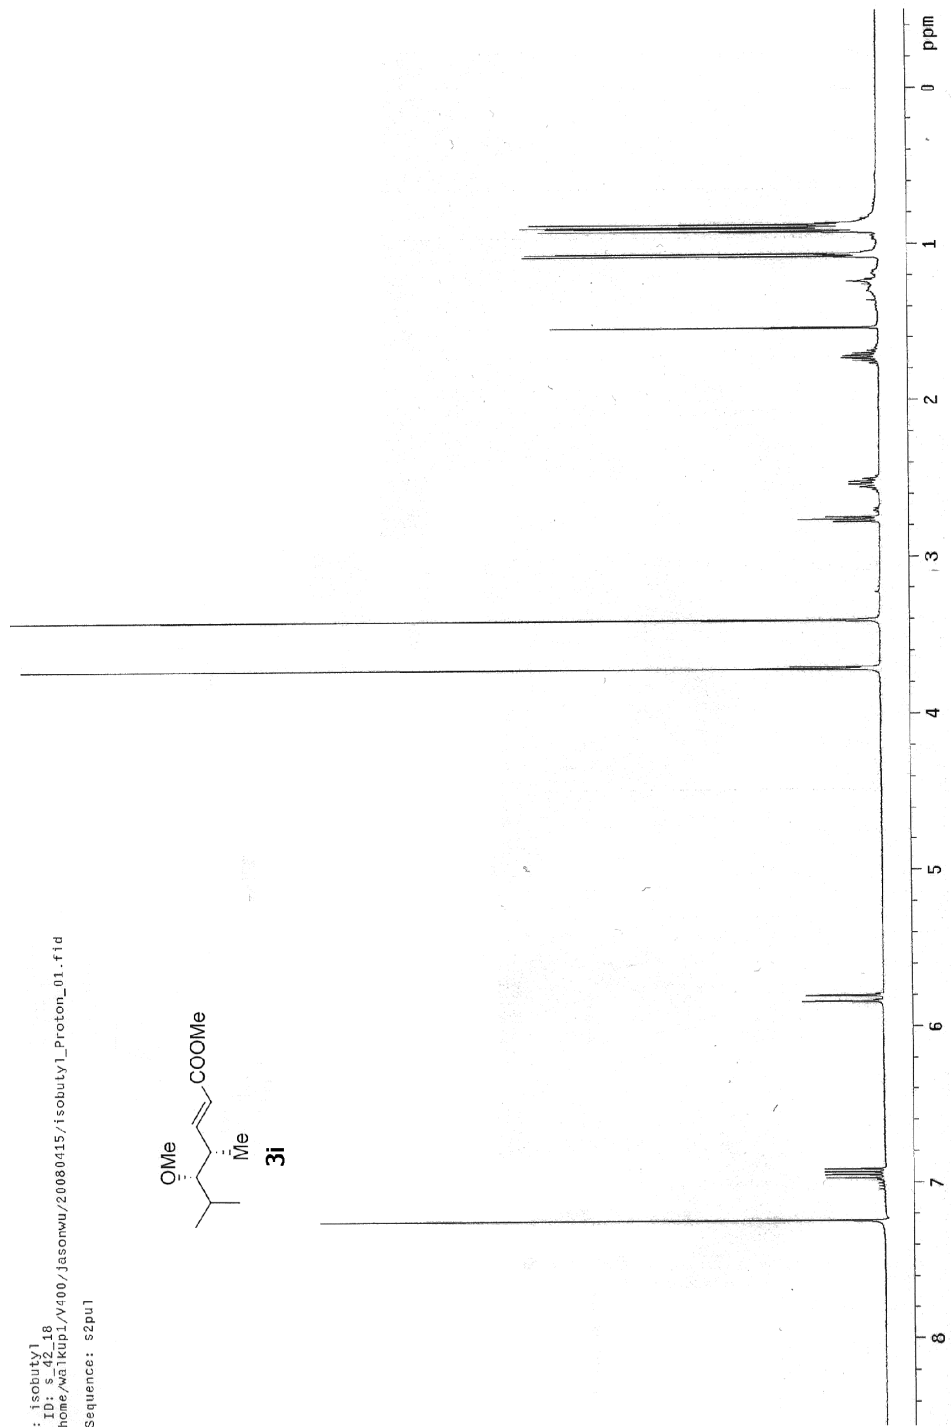

pad=1 run with findzo before acquisition  
 pad=1 run with gradshim before acquisition  
 File: isopropylester\_Carbon\_01  
 Pulse Sequence: s2pu1

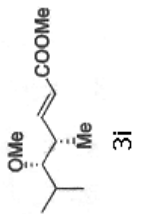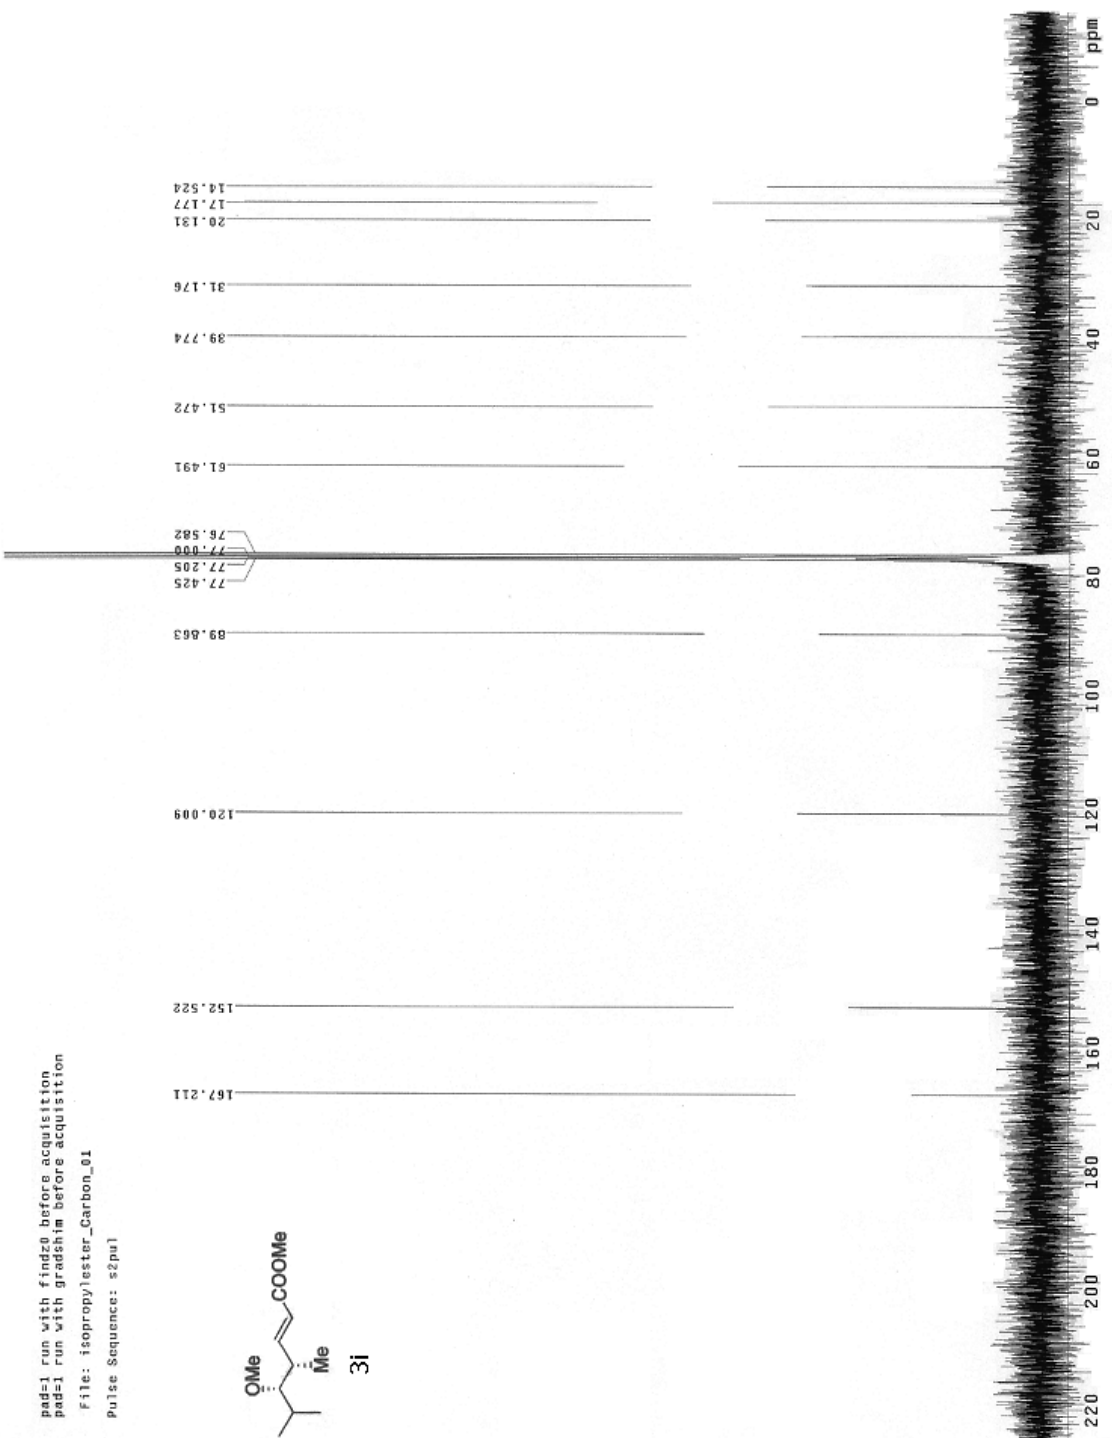

Sample: tertOBn  
Sample ID: s\_20\_22  
File: home/wdtkupi/V400/Jasonwu/20081018/tertOBn\_Proton\_01.fid  
Pulse Sequence: s2pu1

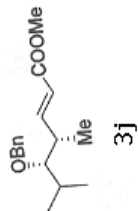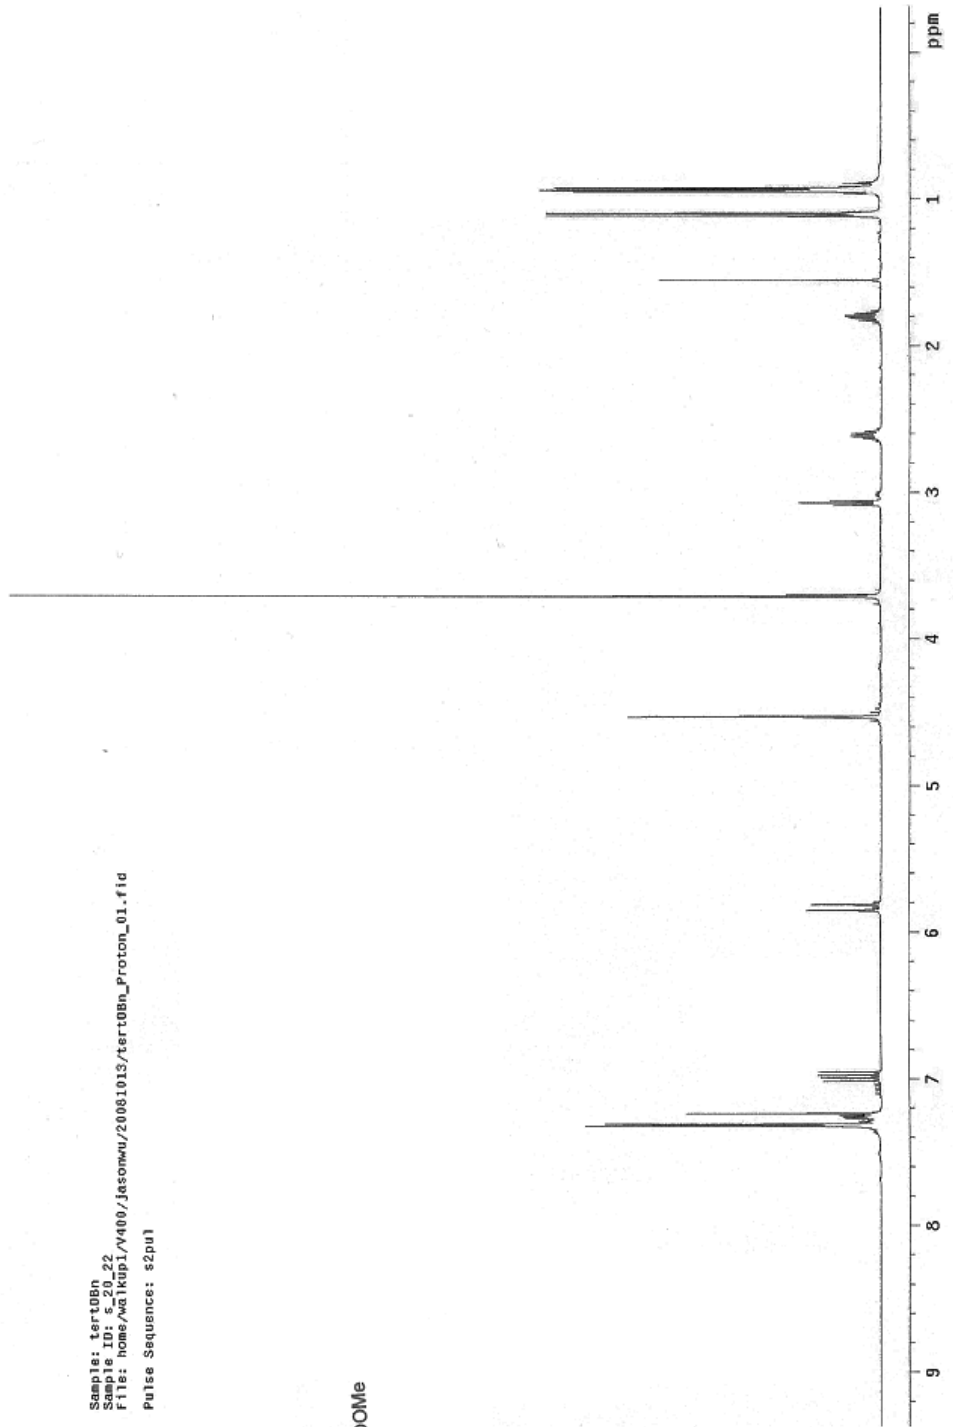

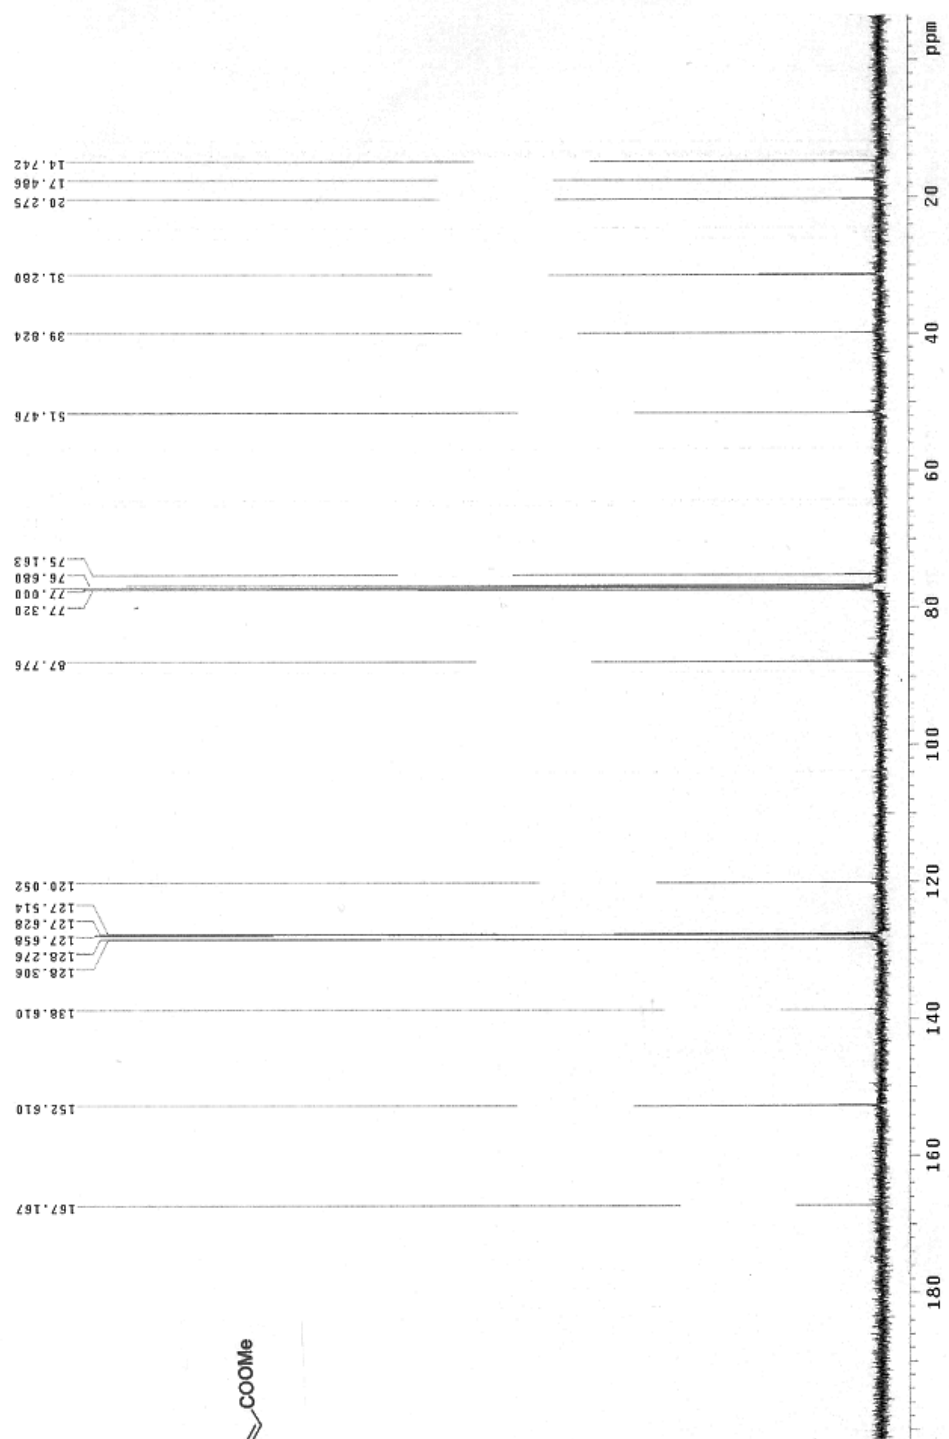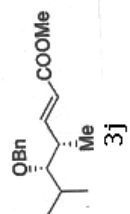

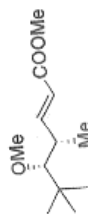

3k

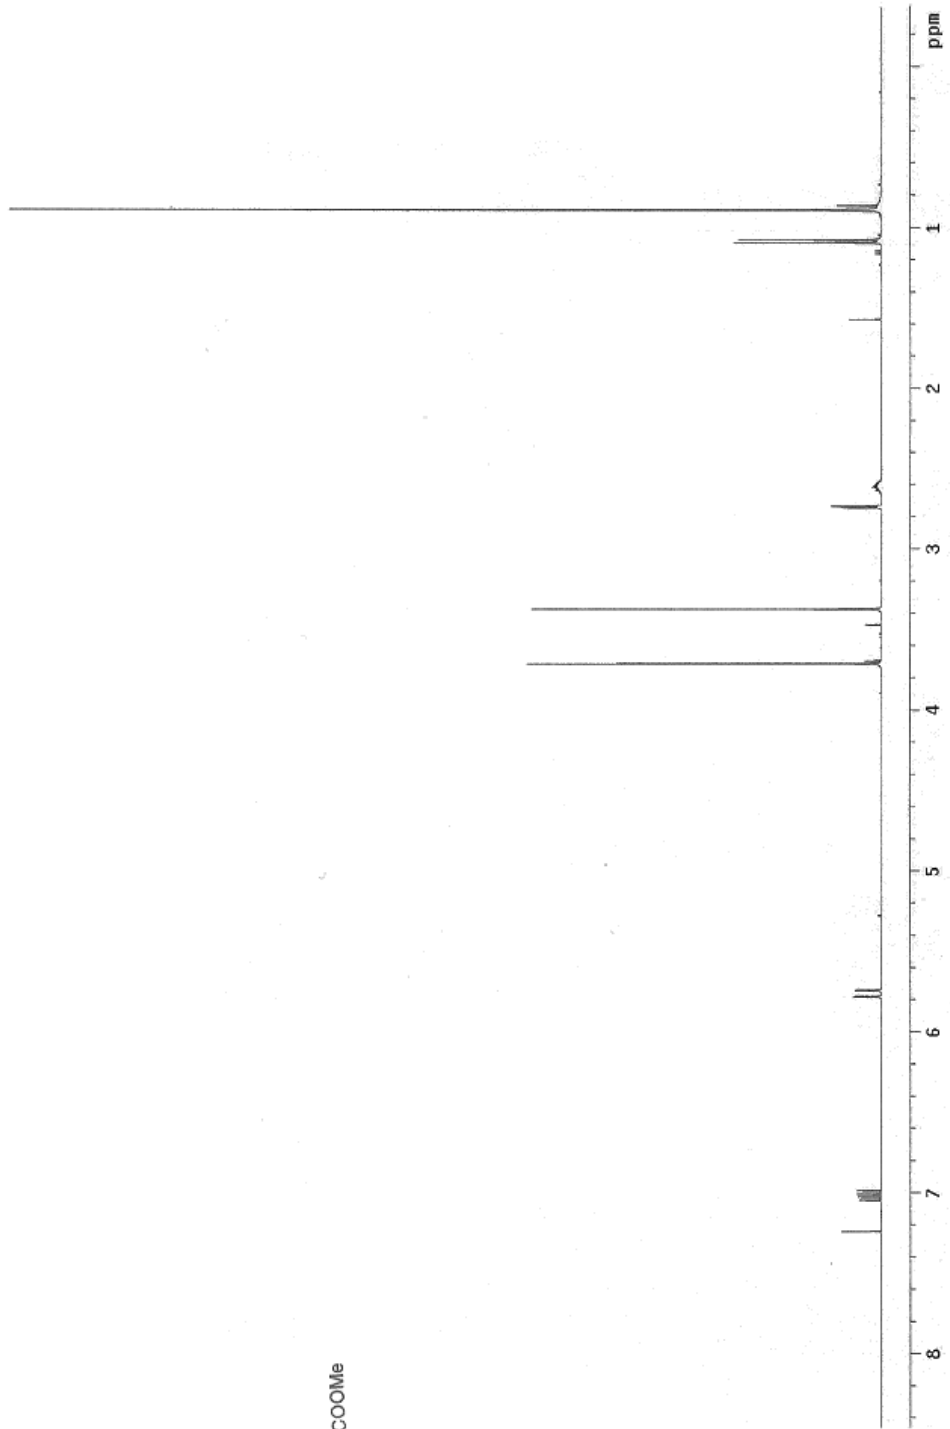

pad=1 run with gradshim before acquisition

Sample: tbu  
Sample ID: S\_06\_01  
File: home/watkkp1/V300/jasonwu/20080430/tbu\_Carbon\_01.fid  
Pulse Sequence: s2pu1

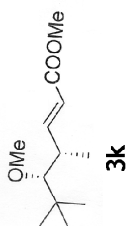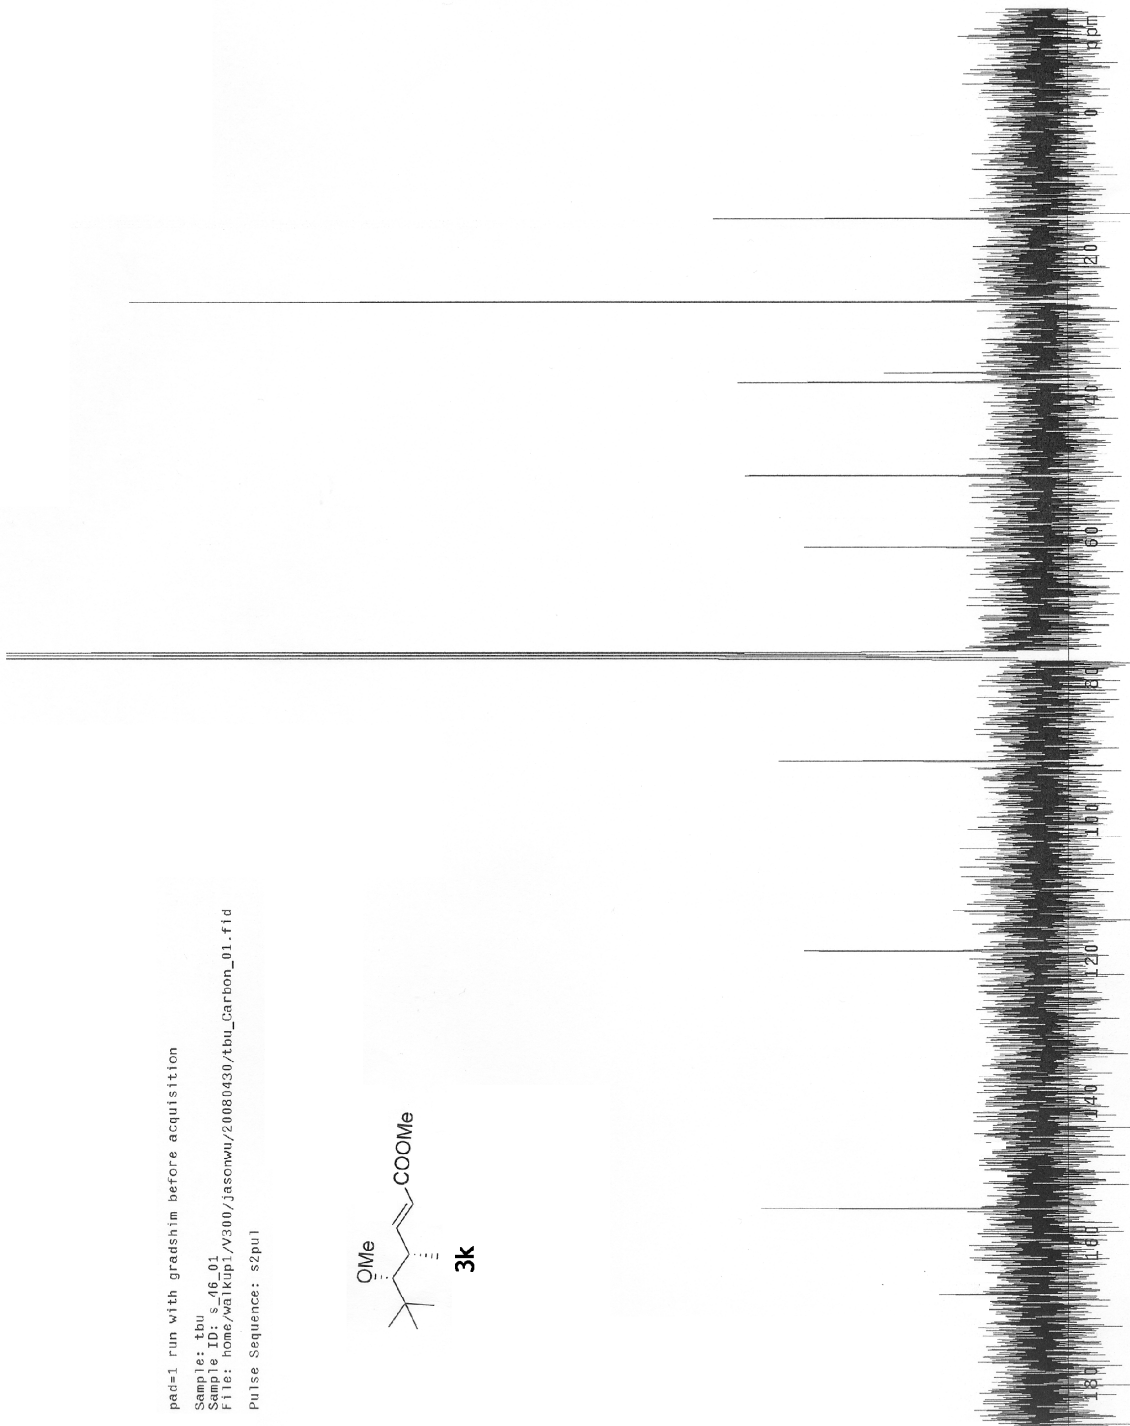

Sample: OBn  
Sample ID: s\_49\_03  
File: home/wal/ktcp1/v400/jasonwu/20080821/OBn\_Proton\_01.fid  
Pulse Sequence: s2pu1

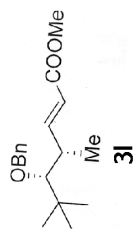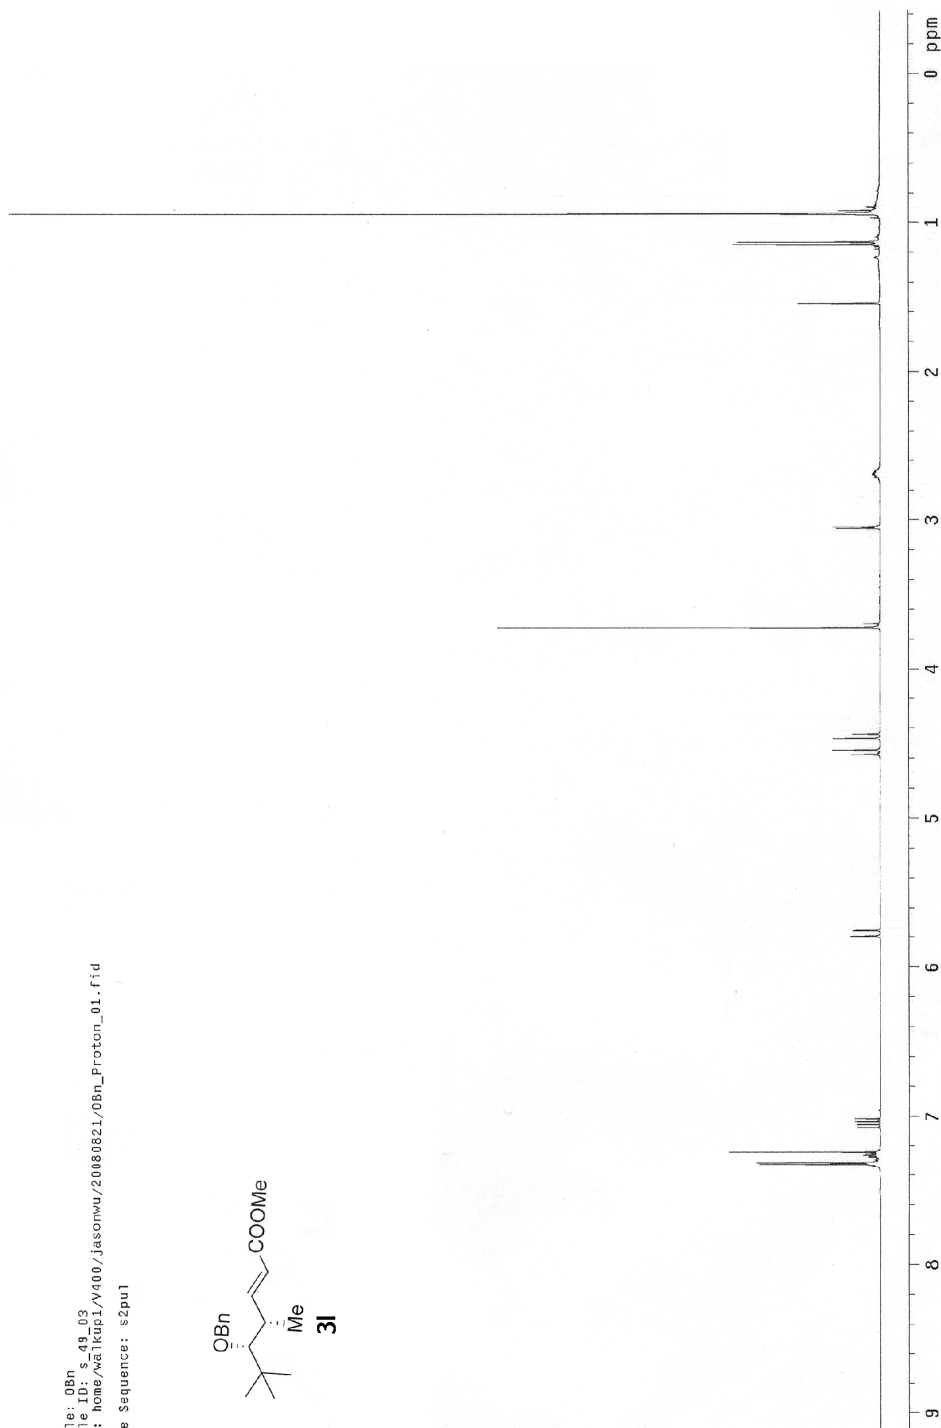



Sample: dbn  
Sample ID: s\_49\_04  
File: home/wa1kup1/v400/jasonwu/20060821/dbn\_Carbon\_01.fid  
Pulse Sequence: sZpu1

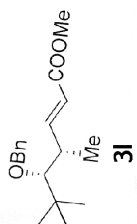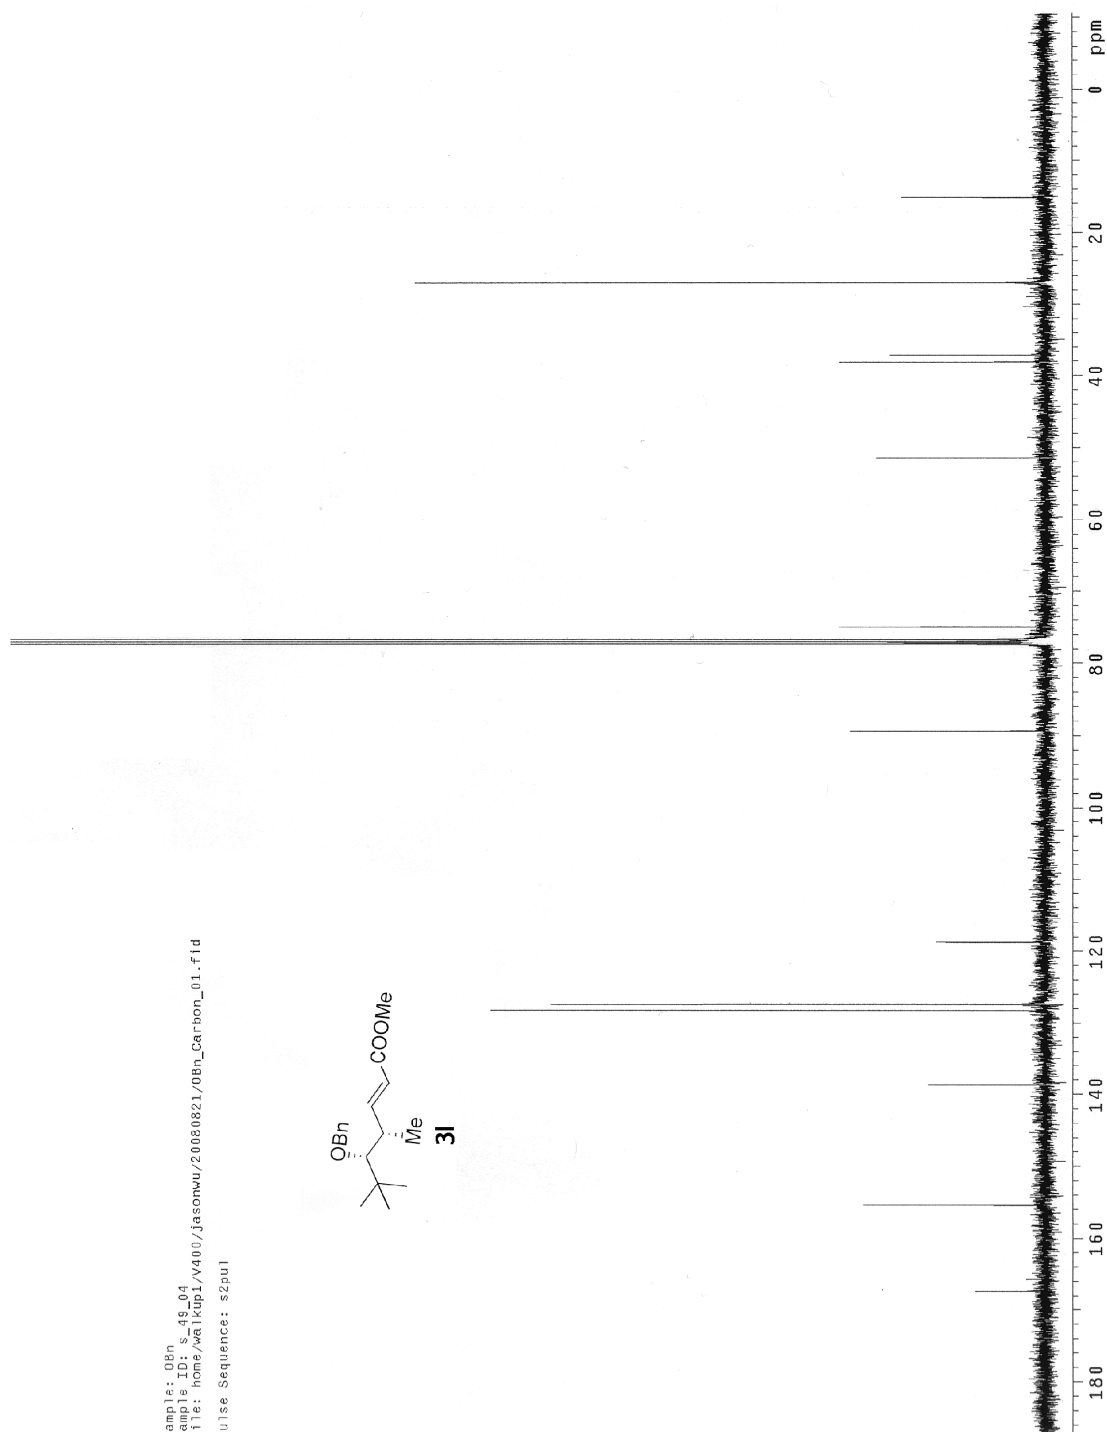

Sample: obn  
Sample ID: S\_16\_09  
File: home/waikupj/vv400/jasonmu/20080726/obn\_Proton\_01.f1d  
Pulse Sequence: s2pu1

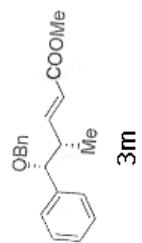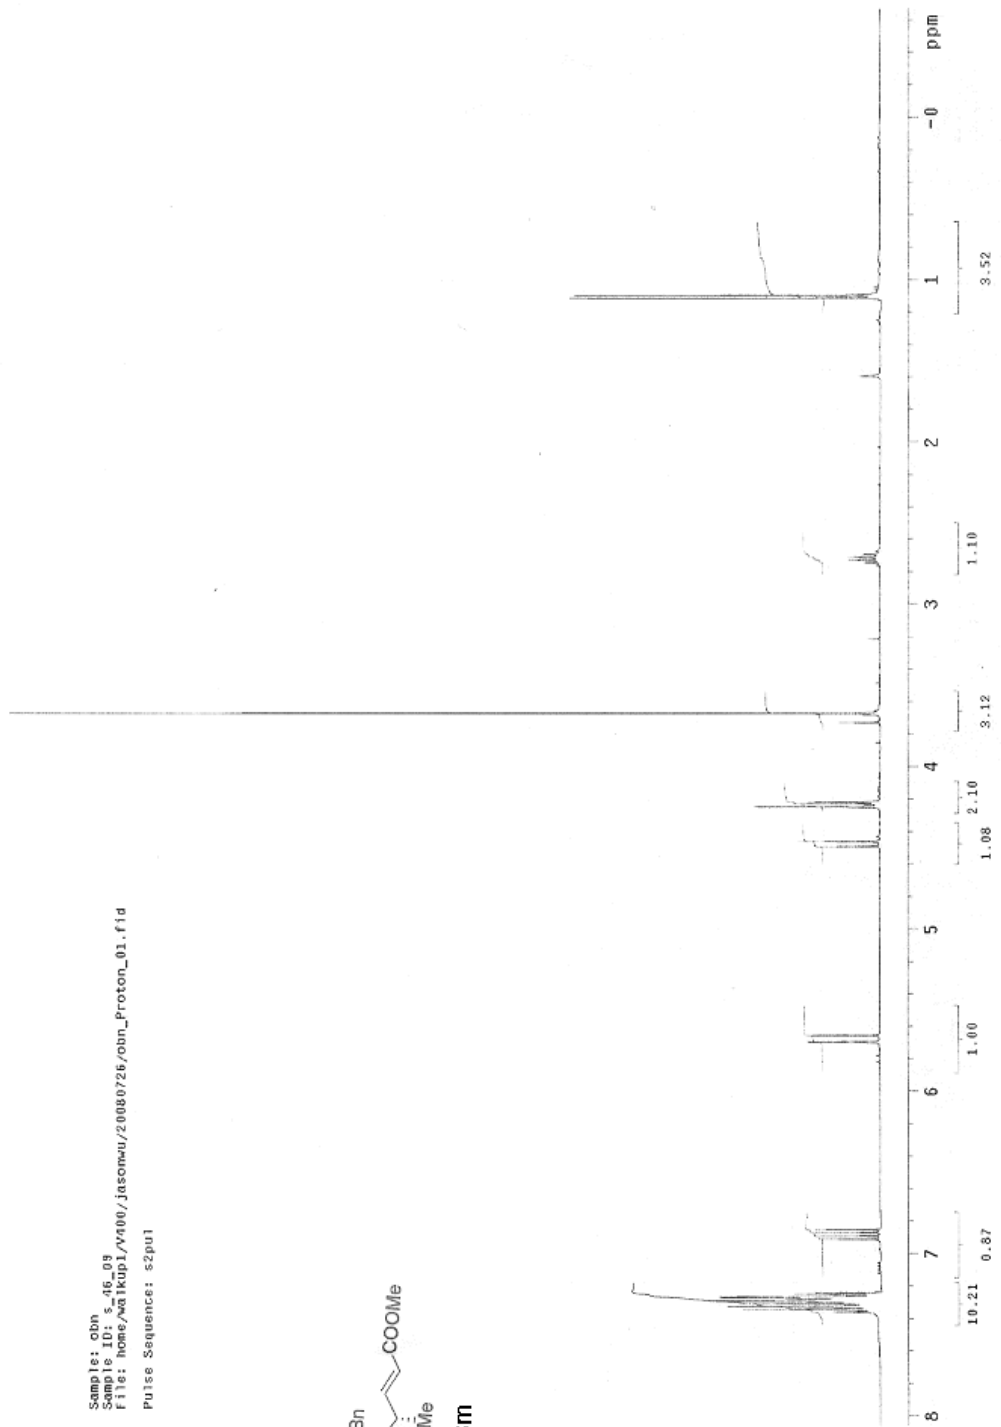

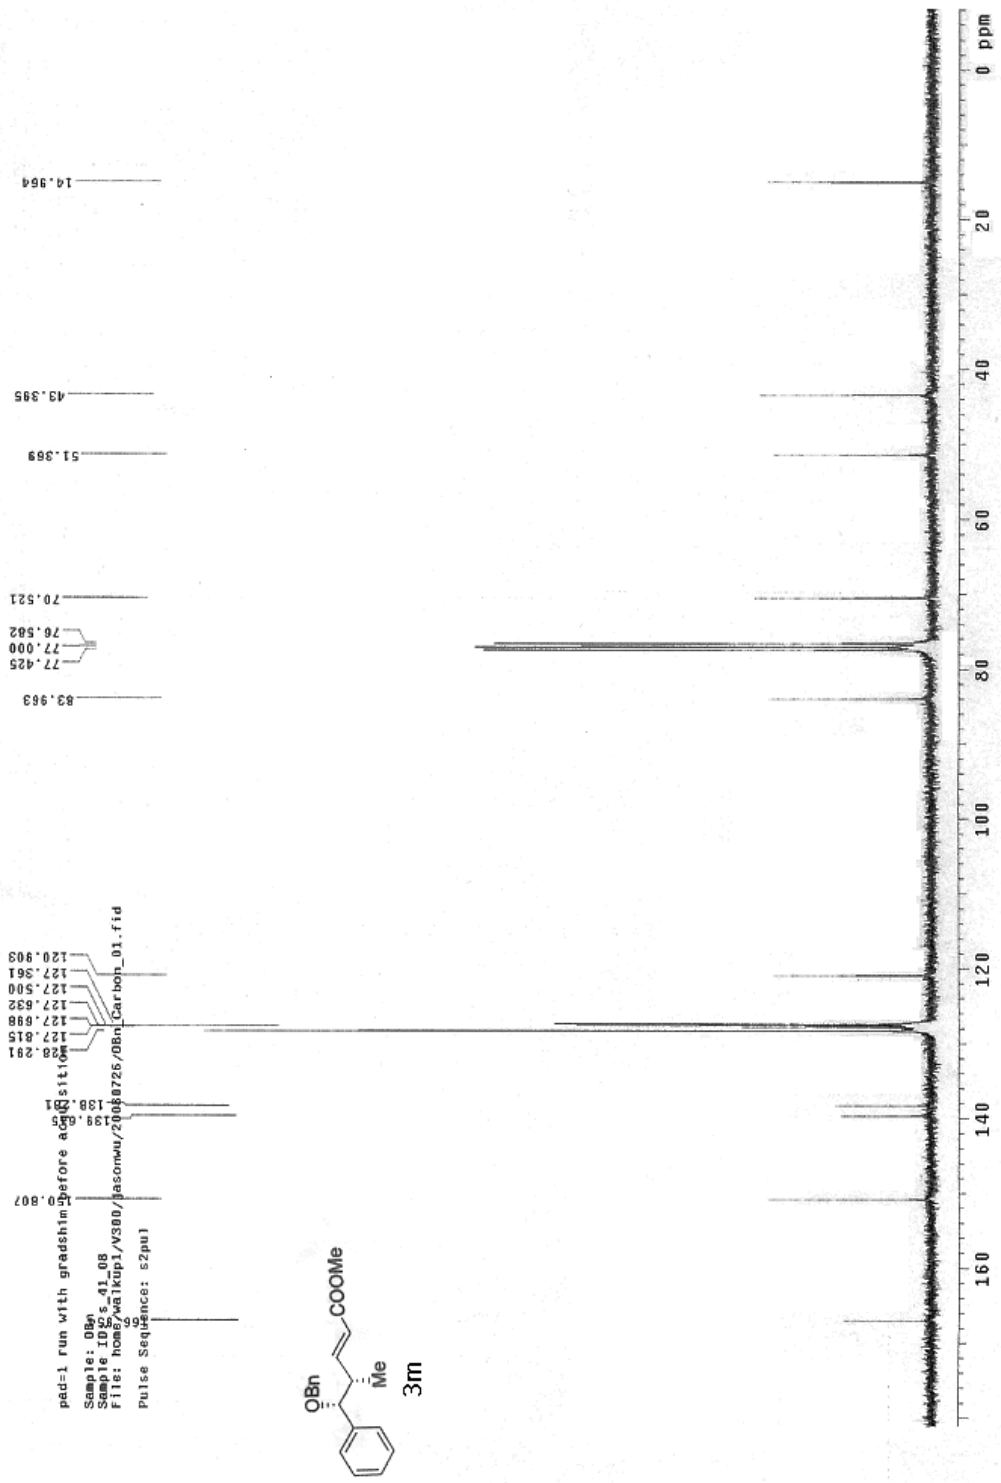

bsp  
Sample Name:  
bsp  
Data Collected on:  
cmidmar2-mercury400  
Archive directory:  
/home/wakupz/vnmrSys/data/users/jasonwu/20100218  
Sample directory:  
bsp\_0  
FidFile: bspPROTON01  
Pulse Sequence: PROTON (s2pu1)  
Solvent: cdcl3  
Data collected on: Feb 18 2010

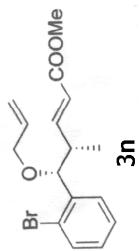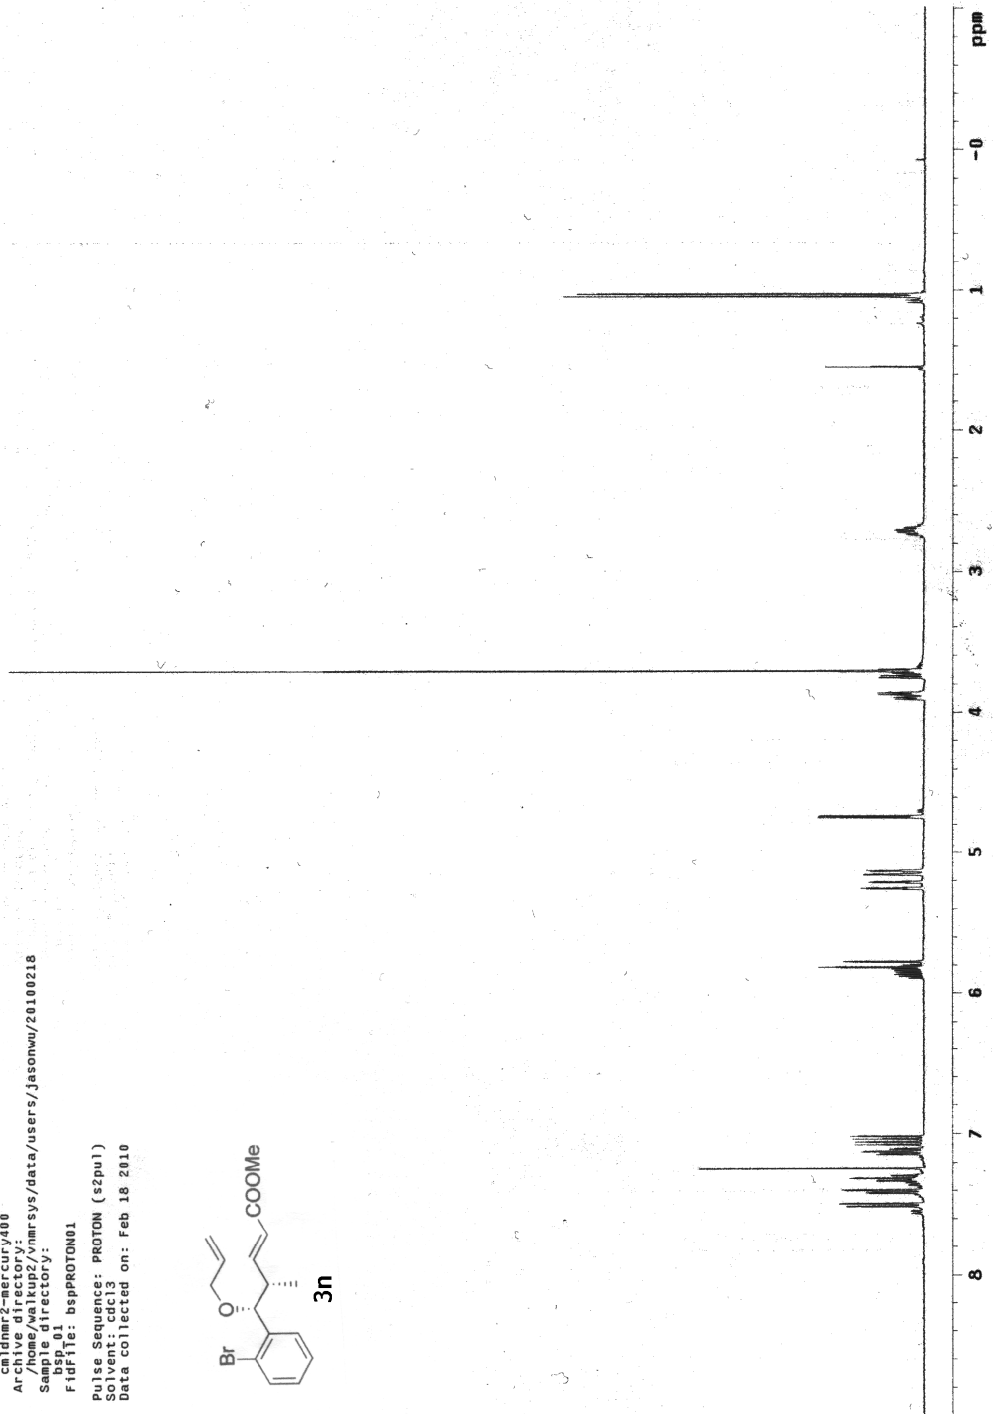

Sample: obrophal11yp  
Sample ID: S145\_01  
File: /home/va1kup3/vmmsys/data/jasonwu/20100220/obrophal11yp\_Carbon\_01.fid  
Pulse Sequence: s2pu1

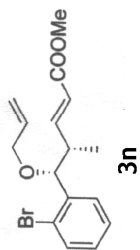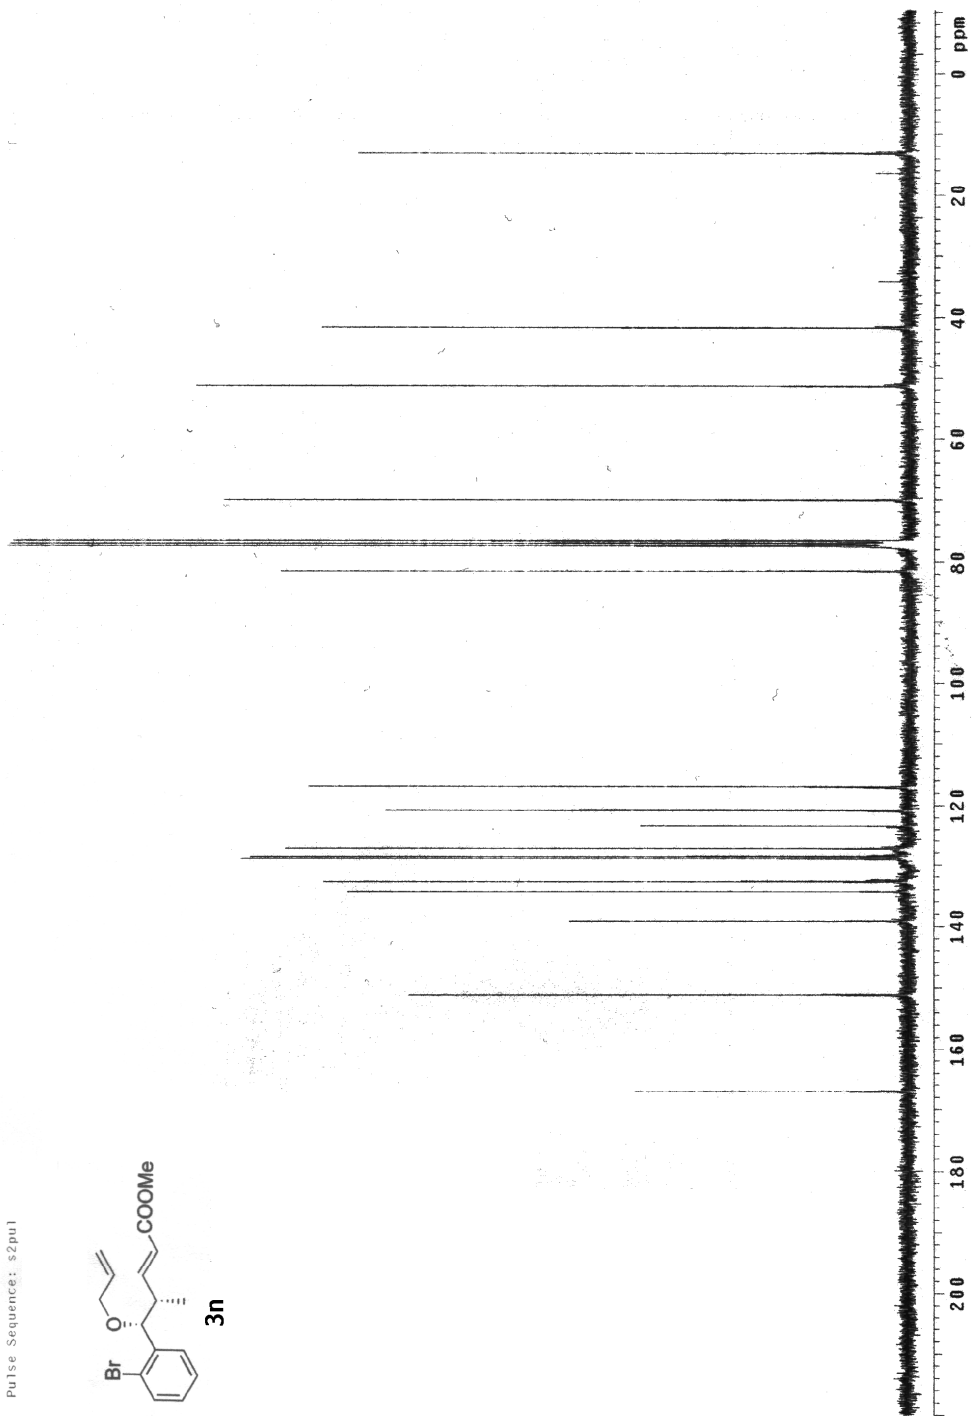

File: dimethox Proton 01

Pulse Sequence: zgpg30

Solvent: cdcl3  
Ambient Temperature  
Sample Temperature: 300.2 K  
File: dimethox Proton 01  
F1: C:\data66\bu.edu"

Relay delay: 1.000 sec  
Pulse: 45.0 degrees  
Acq. time: 3.590 sec  
Width: 6410.3 Hz  
& repetitions  
OBSERVE: H1, 400.0125274 MHz  
DATA PROCESSING: 0.2 Hz  
FT size: 65536  
Total time: 0 min, 45 sec

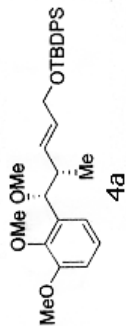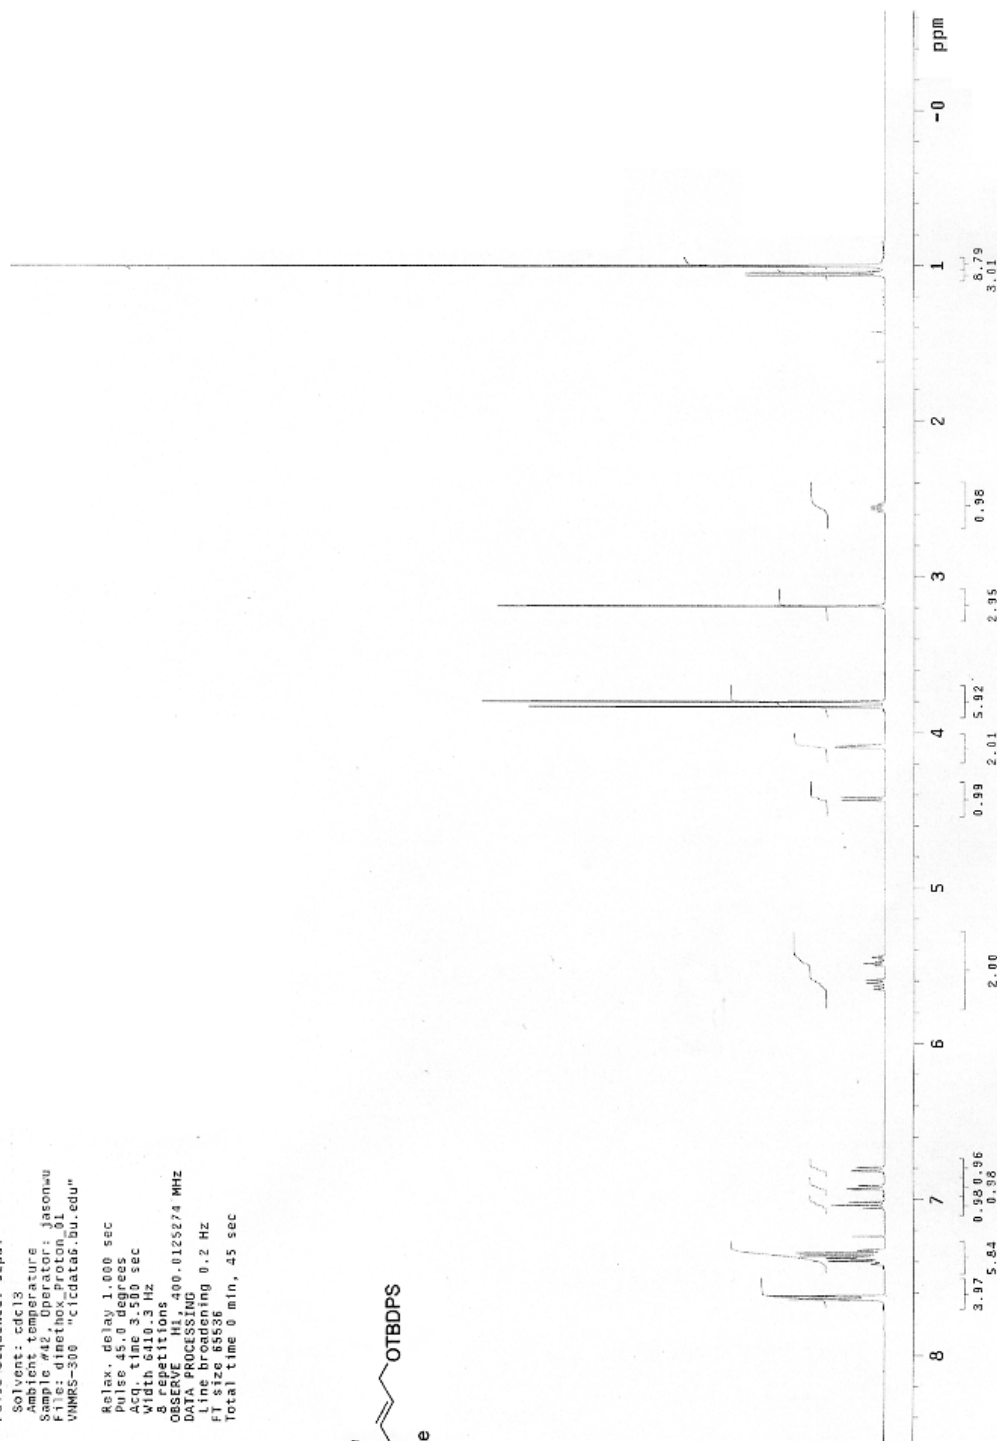

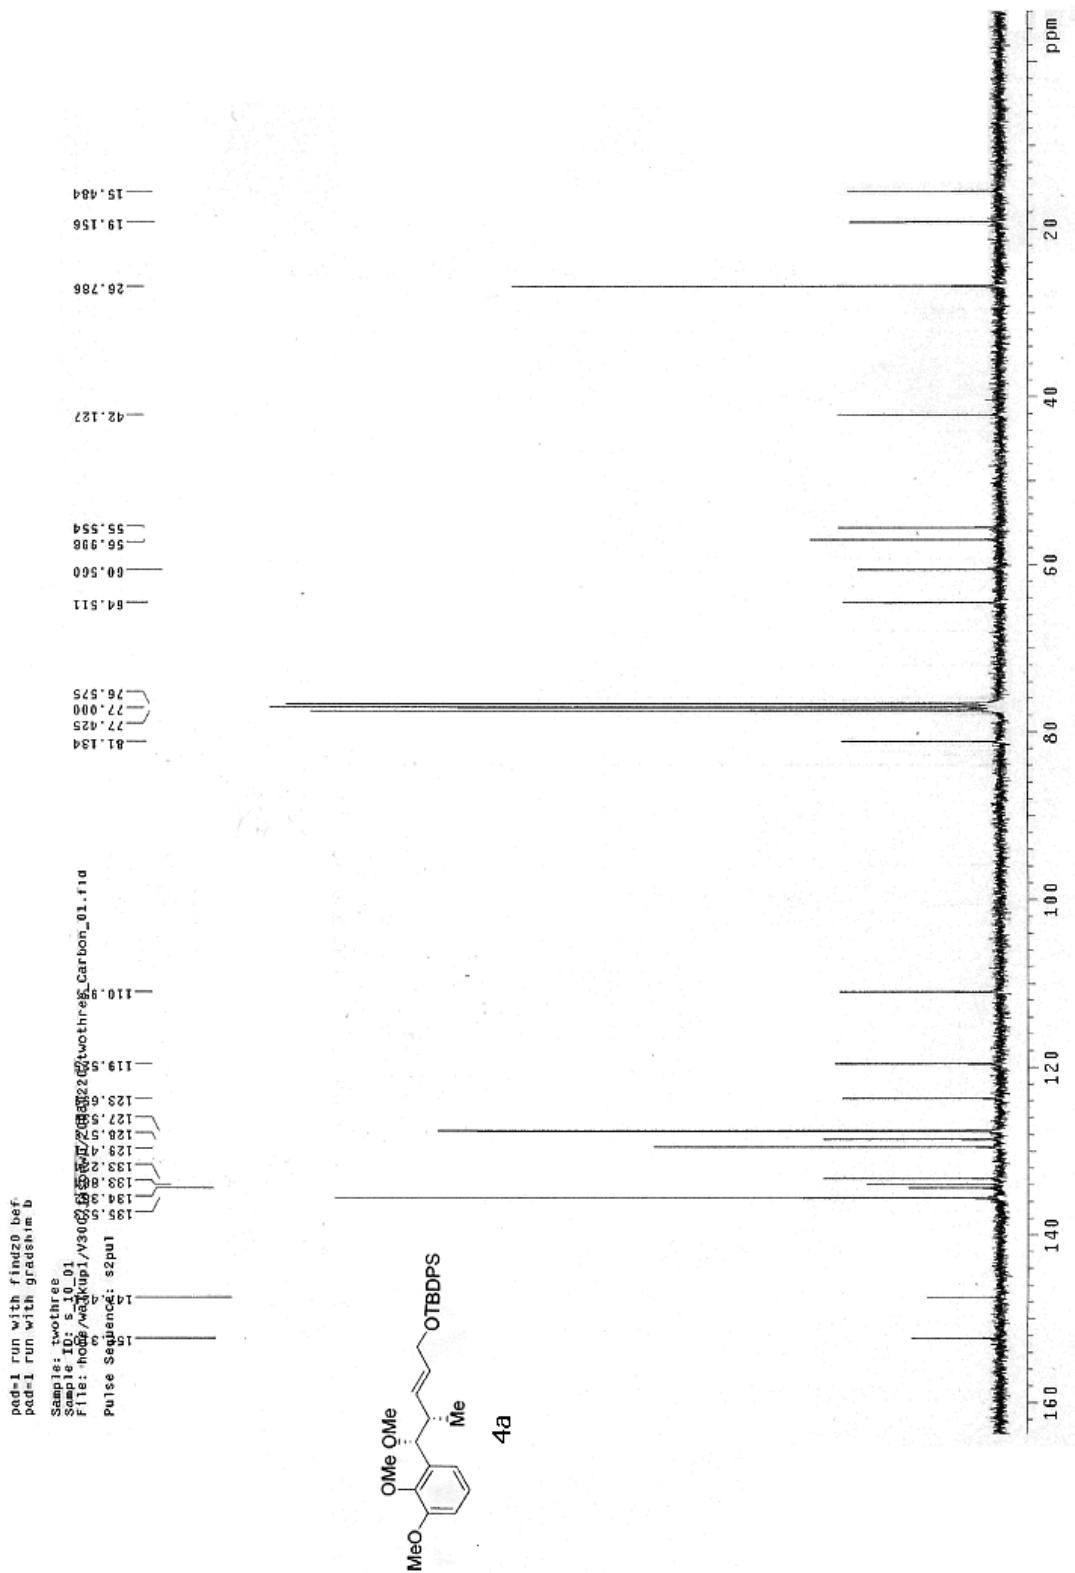

Sample: YC\_2\_5\_0Me\_top  
Sample ID: S\_46\_03  
File: home/watkup1/Y400/chenyu/20081002/YC\_2\_5\_0Me\_top\_proton\_01.fid  
Pulse Sequence: s2pu1

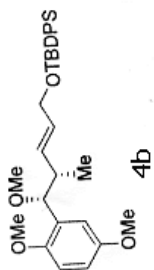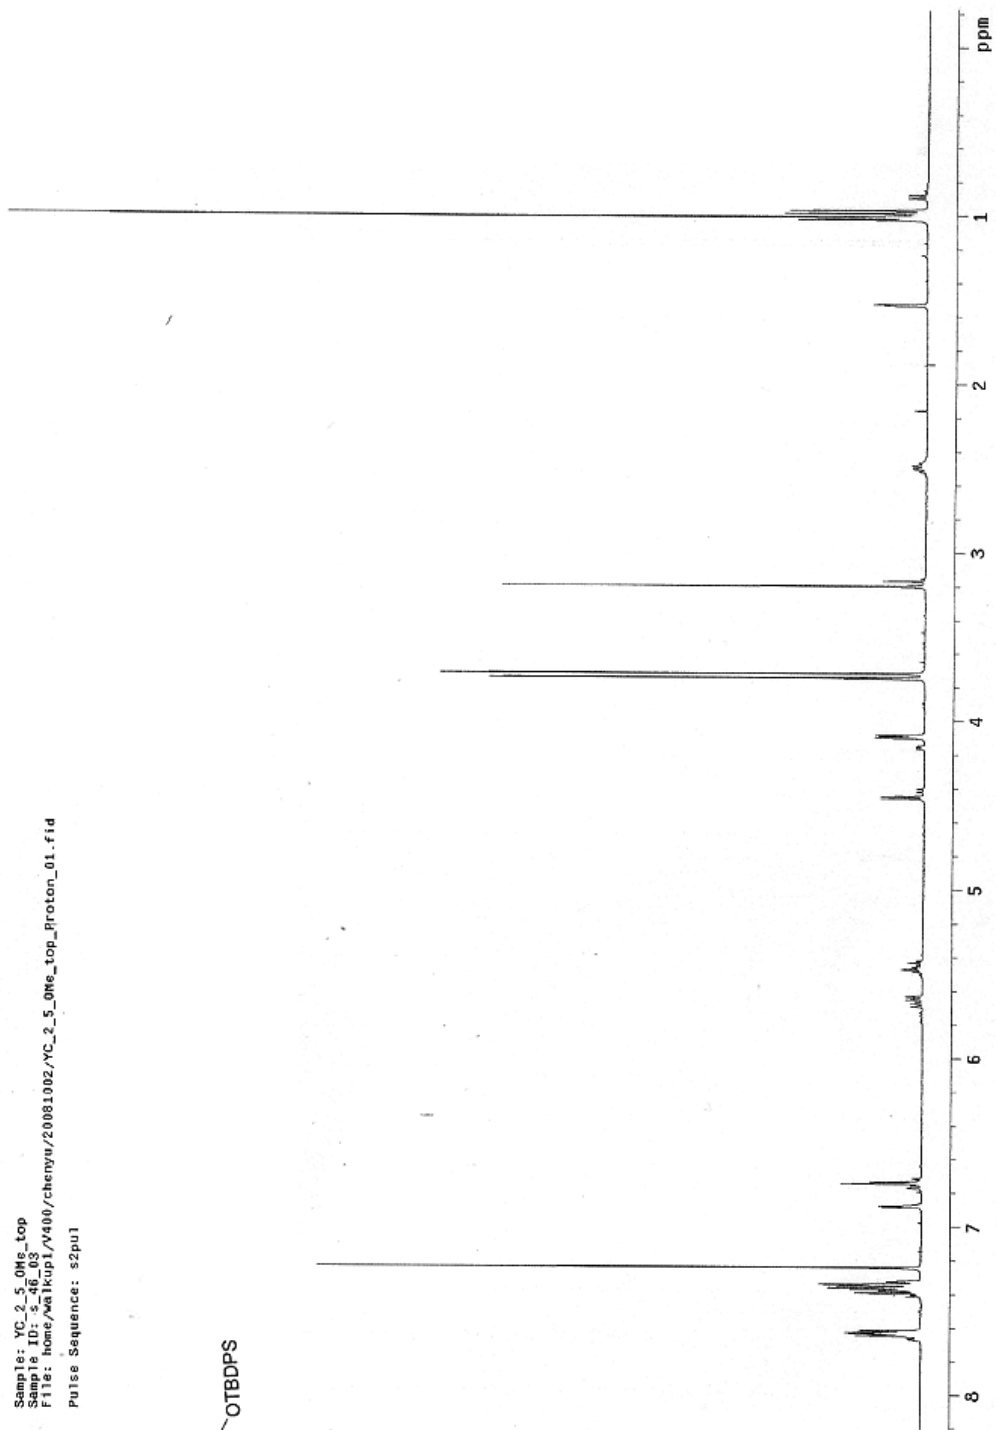



pad=1 run with findz0 before acquisition  
 pad=1 run with gradshim before acquisition

Sample: twofive  
 Sample ID: 5\_11\_01  
 Sample Name: Metldp1  
 File: 20060220\_45461960\_Carbon\_01.fid  
 Pulse Sequence: s2p1

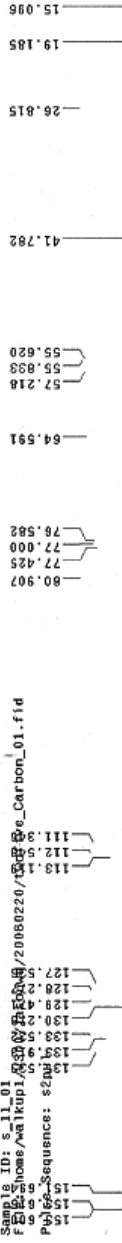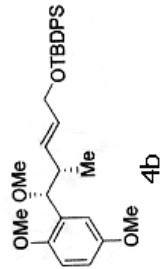

File: toluenecp\_Proton\_01  
Pulse Sequence: s2pul

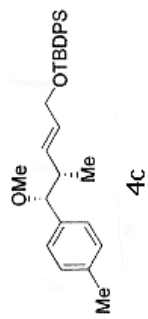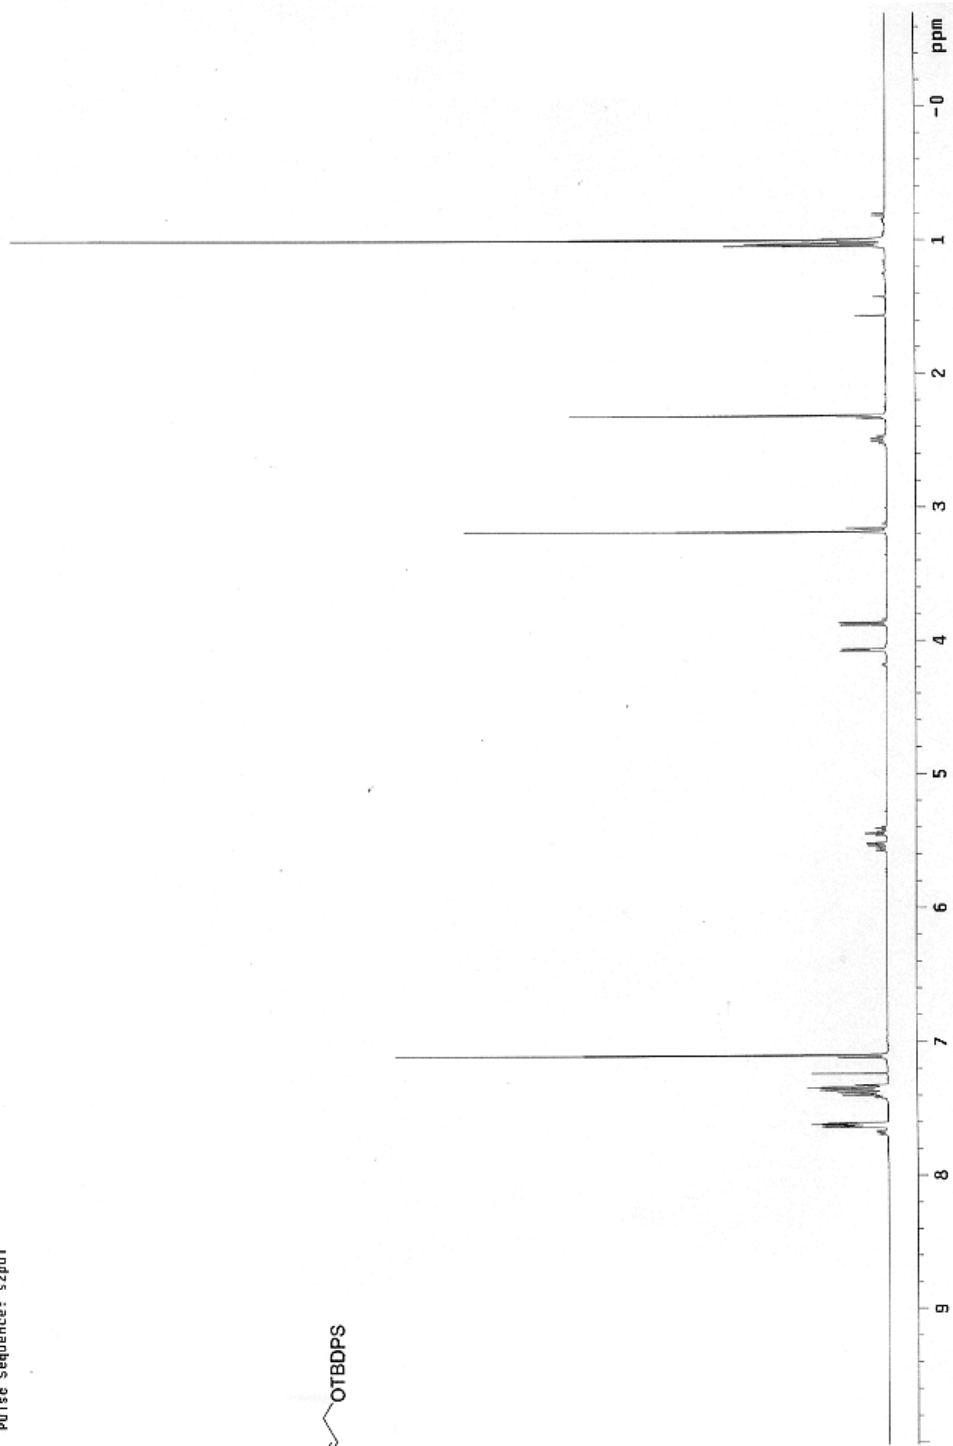



Sample: benzylmethoxy  
Sample ID: 20080317  
File: home/waltrip/V4100/Jasonwu/20080317/benzylmethoxy\_Proton\_01.f1d  
Pulse Sequence: s2pu1

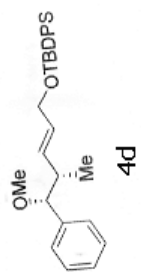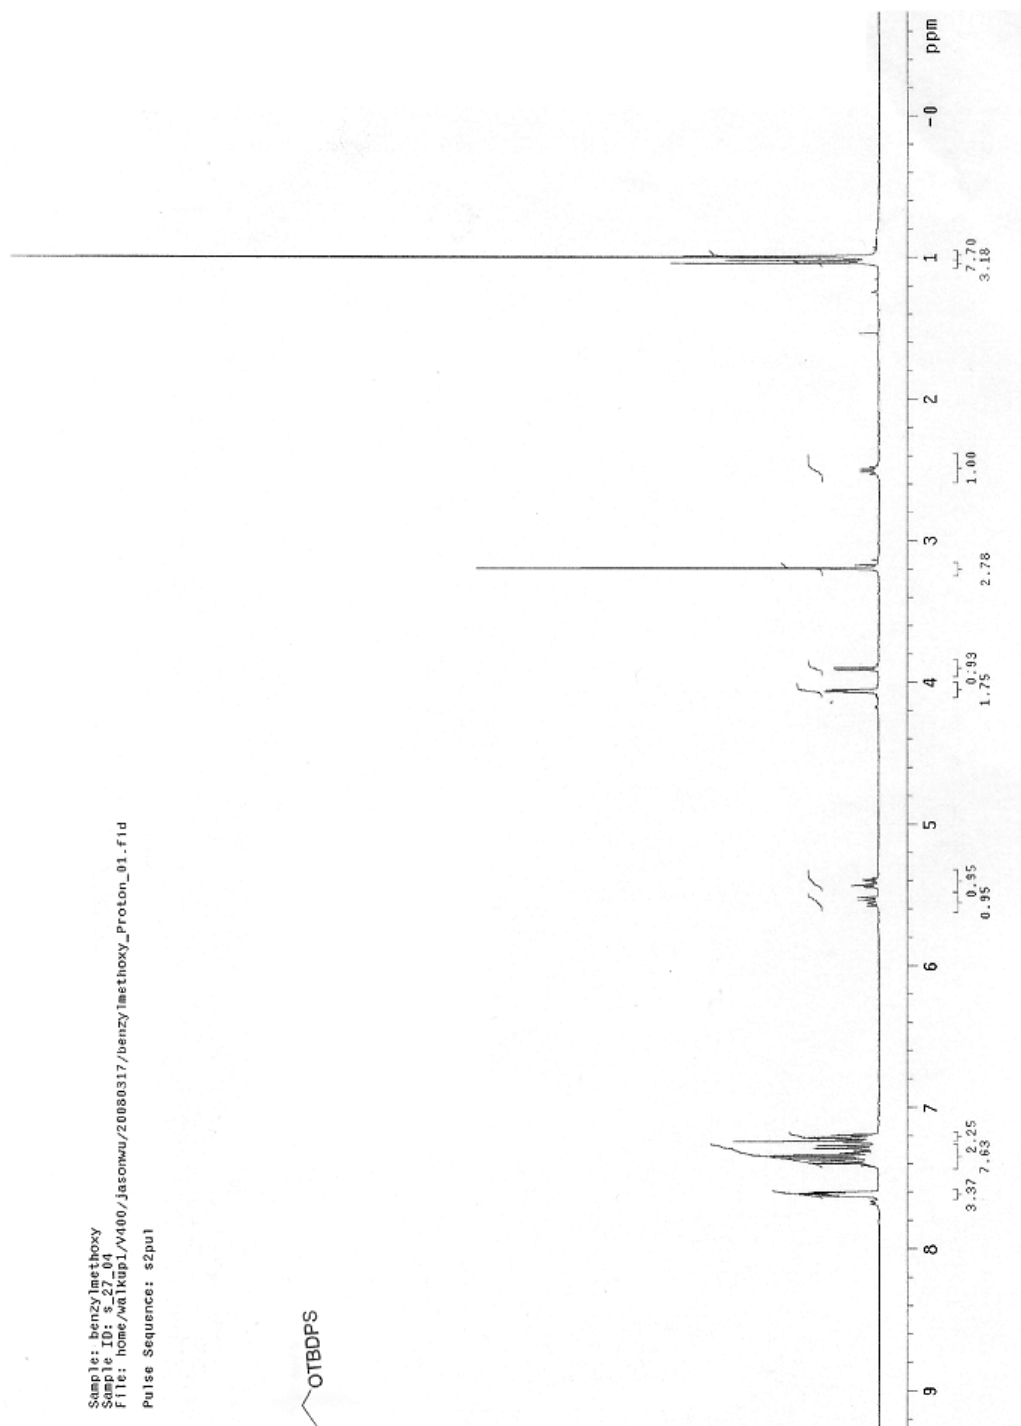

pad=1 run with findz0 before acquisition  
 pad=1 run with gradshim before acquisition

Automation directory:

Sample file: s\_16\_02

Sample: ben

Pulse Sequence: zgpg30

Solvent: cdcl3

Ambient temperature:

Sample #46, Operator: jasonwu

File: ben\_Carbon\_01

Mercury-300DBB "Cicdata2"

Relax. delay 1.000 sec

Pulse 45.0 degrees

Acq. time 1.30 sec

400 MHz

5000 repetitions

OBSERVE C13, 75.4293947 MHZ

DECOUPLE H1, 289.9789680 MHZ

Power 37 dB

continuously on

WALTZ-16 modulated

DATA PROCESSING

Using presatting 0.5 Hz

FT size 65536

Total time 3 hr, 18 min, 16 sec

87.987  
 77.425  
 77.205  
 77.000  
 76.582  
 64.964  
 56.933  
 42.096  
 20.801  
 19.193  
 15.887

127.309  
 127.500  
 127.558  
 127.962  
 128.641  
 129.501  
 132.418  
 133.854  
 134.276

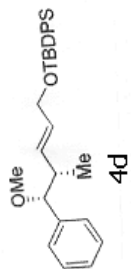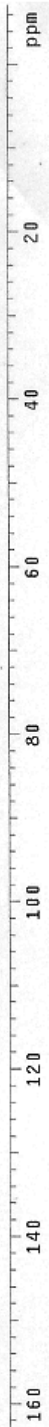

File: fourbrOTBDPS\_Proton\_01  
Pulse Sequence: szpu1

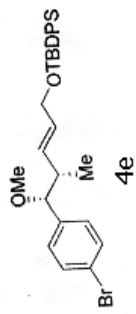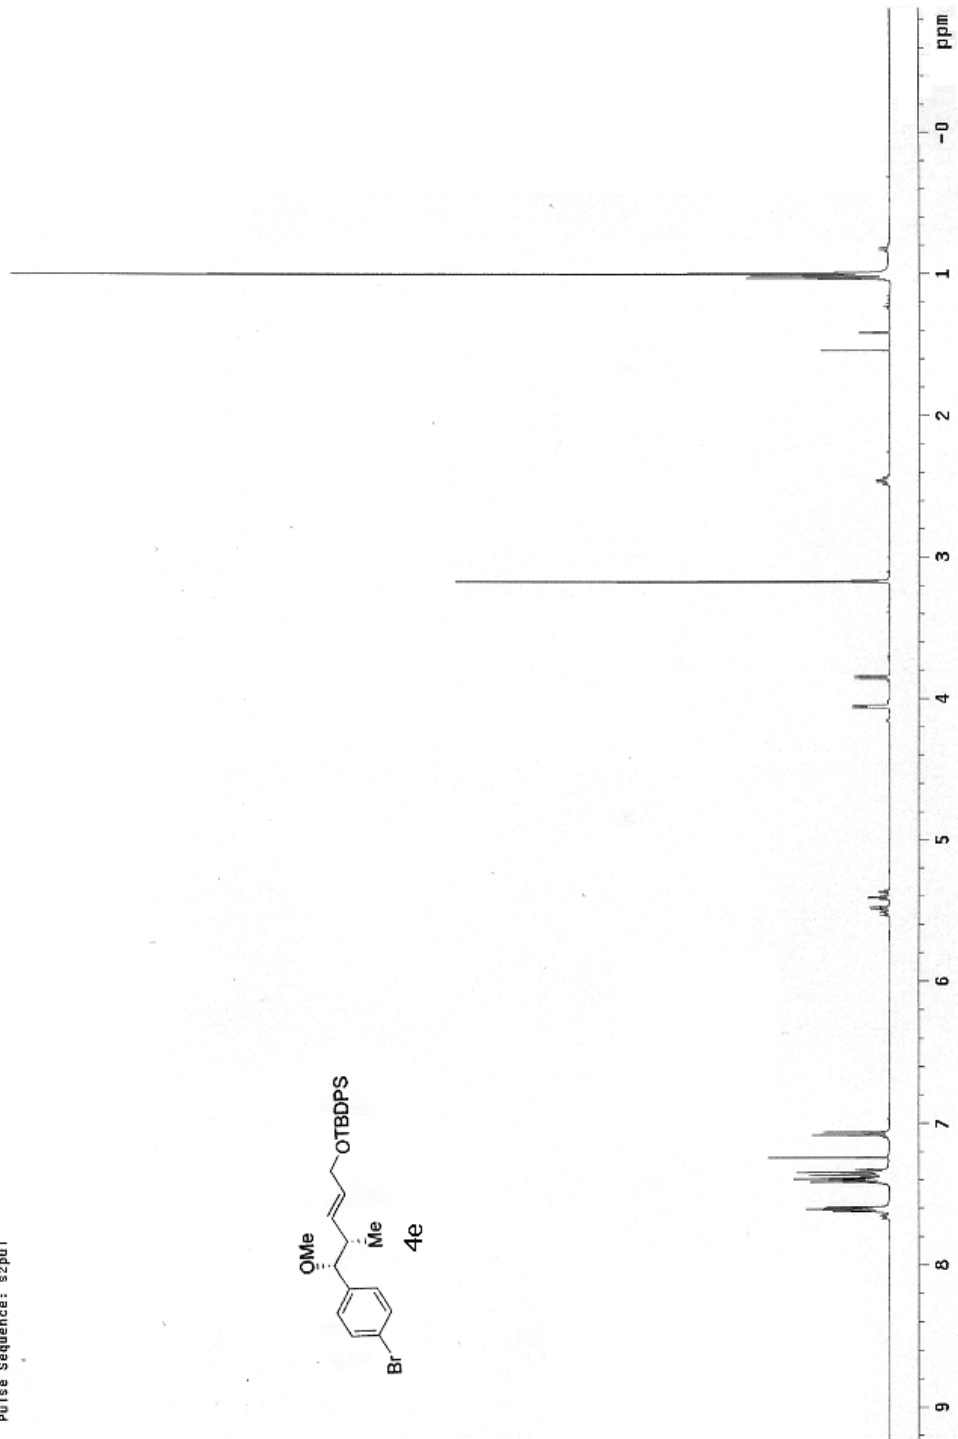

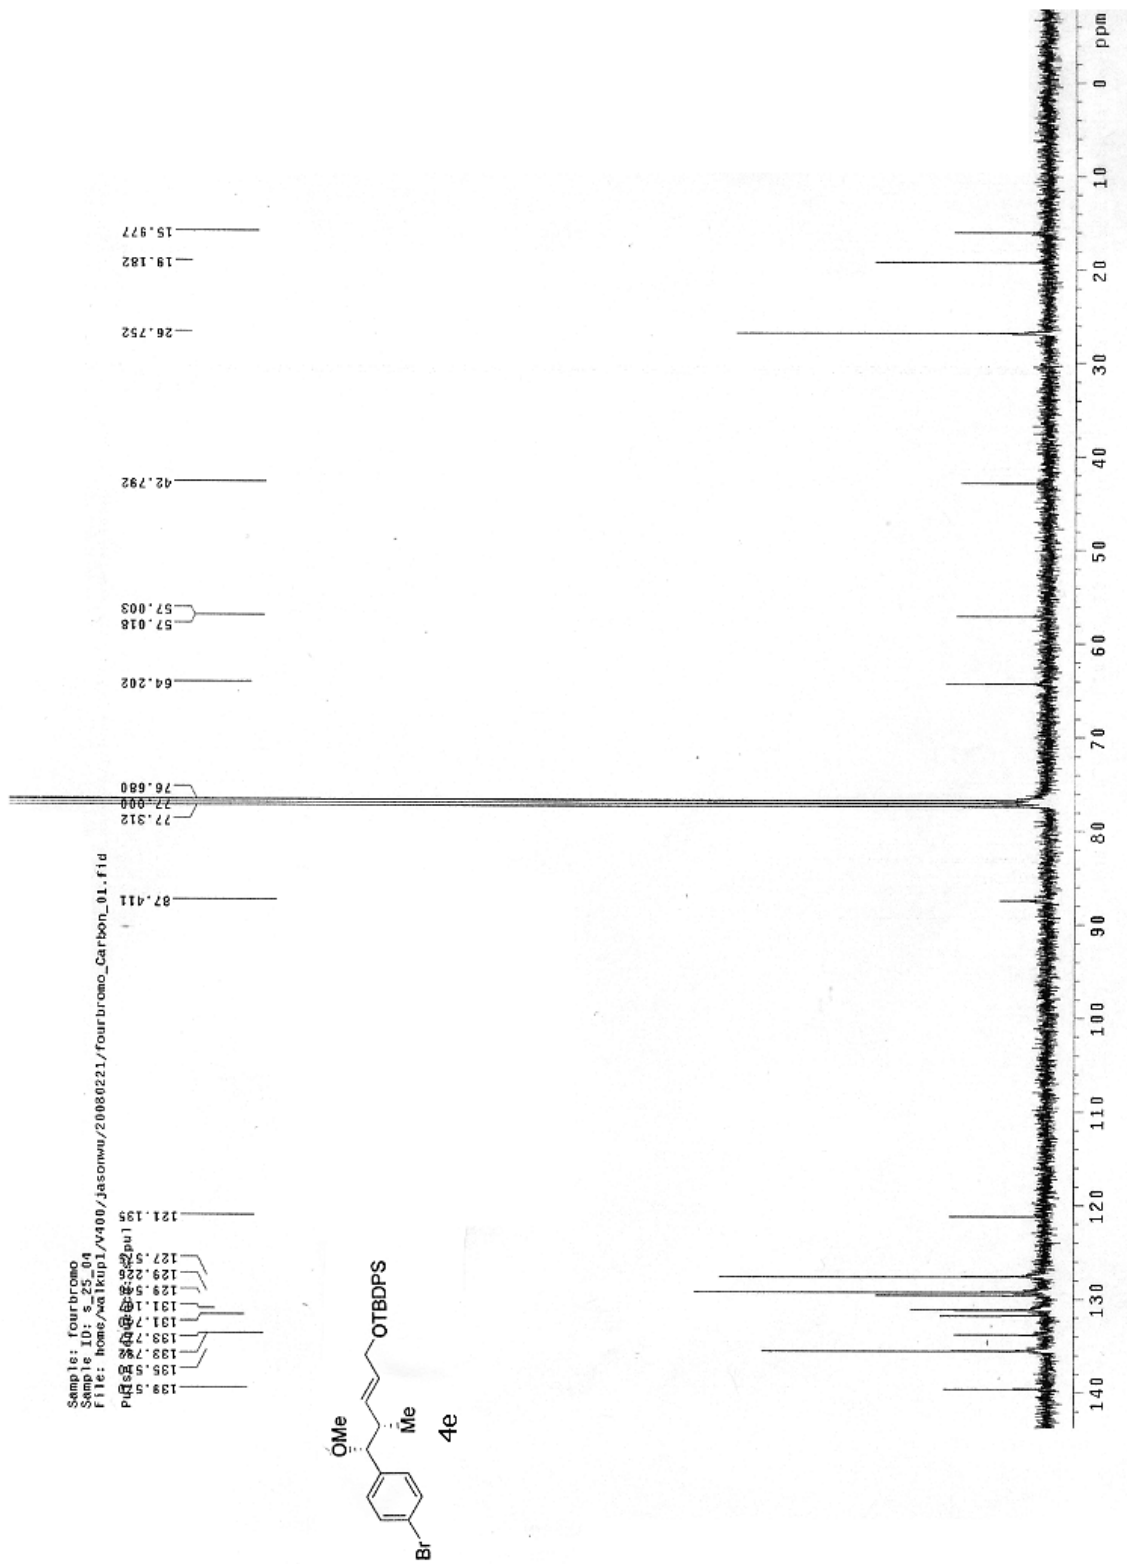

Sample: YC\_2Br\_1  
Sample ID: s\_47\_04  
File: home/walkup1/V400/chenyu/20081001/YC\_2Br\_1\_Proton\_01.fid  
Pulse Sequence: s2pu1

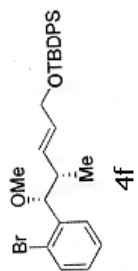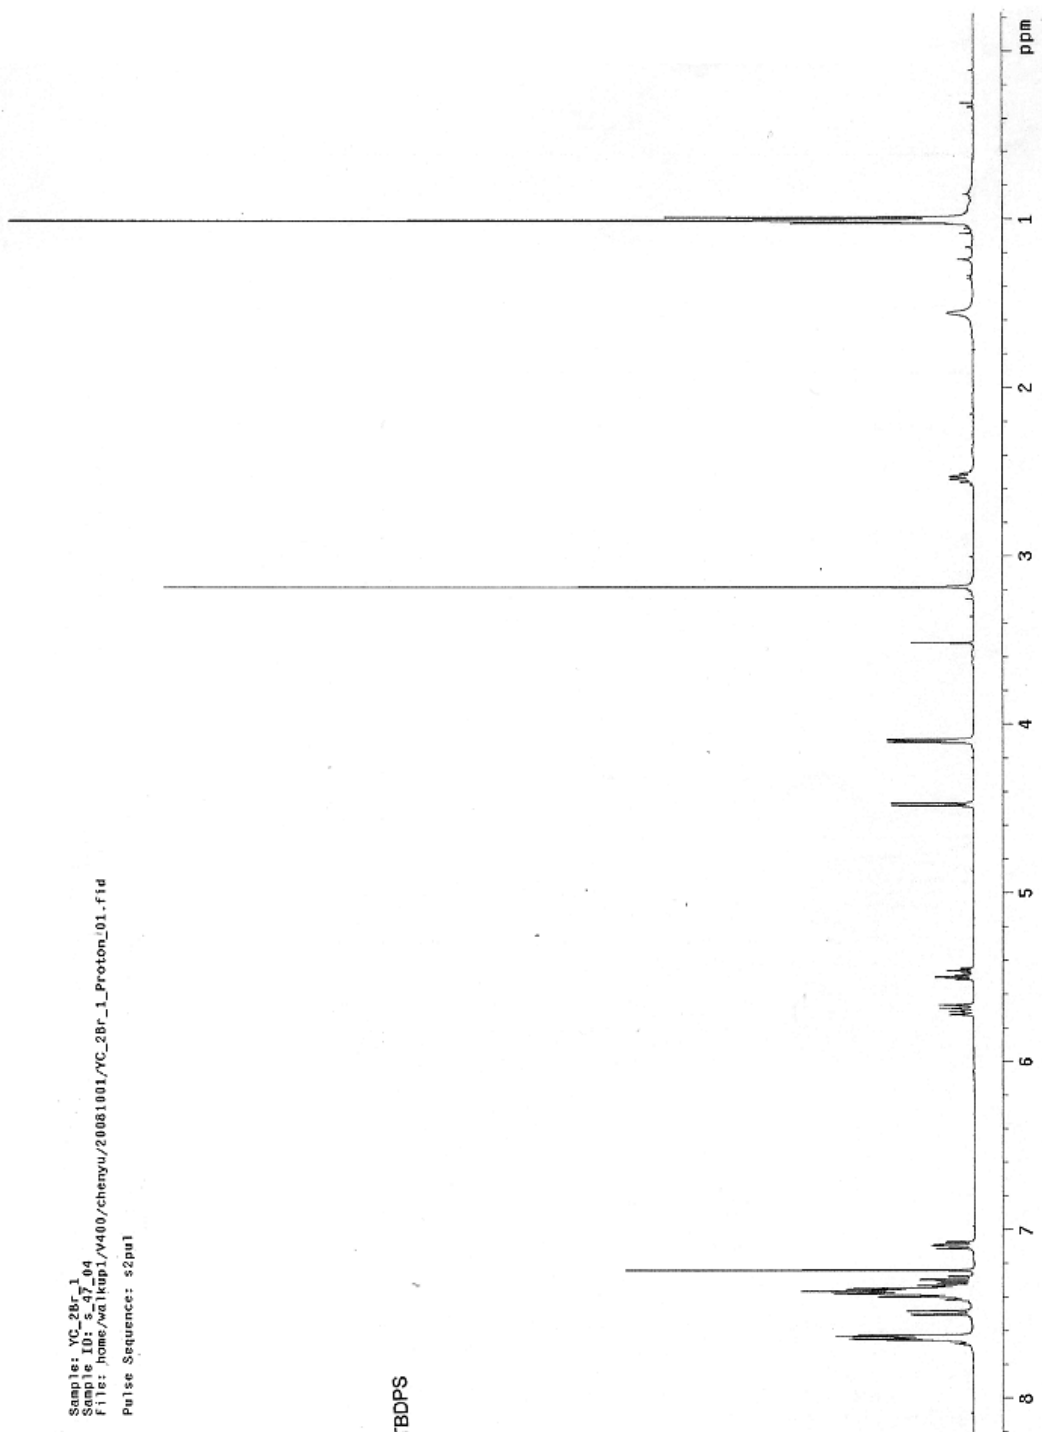



pad-1 run with findzo before acquisition  
pad-1 run with gradshim before acquisition

Sample: twobromo  
Sample ID: 83105  
File: 0103080219/twobromo\_Carbon\_01.fid  
Pulse Sequence: zgpg30

124  
122  
121  
120  
119  
118  
117  
116  
115  
114  
113  
112  
111  
110  
109  
108  
107  
106  
105  
104  
103  
102  
101  
100  
99  
98  
97  
96  
95  
94  
93  
92  
91  
90  
89  
88  
87  
86  
85  
84  
83  
82  
81  
80  
79  
78  
77  
76  
75  
74  
73  
72  
71  
70  
69  
68  
67  
66  
65  
64  
63  
62  
61  
60  
59  
58  
57  
56  
55  
54  
53  
52  
51  
50  
49  
48  
47  
46  
45  
44  
43  
42  
41  
40  
39  
38  
37  
36  
35  
34  
33  
32  
31  
30  
29  
28  
27  
26  
25  
24  
23  
22  
21  
20  
19  
18  
17  
16  
15  
14  
13  
12  
11  
10  
9  
8  
7  
6  
5  
4  
3  
2  
1

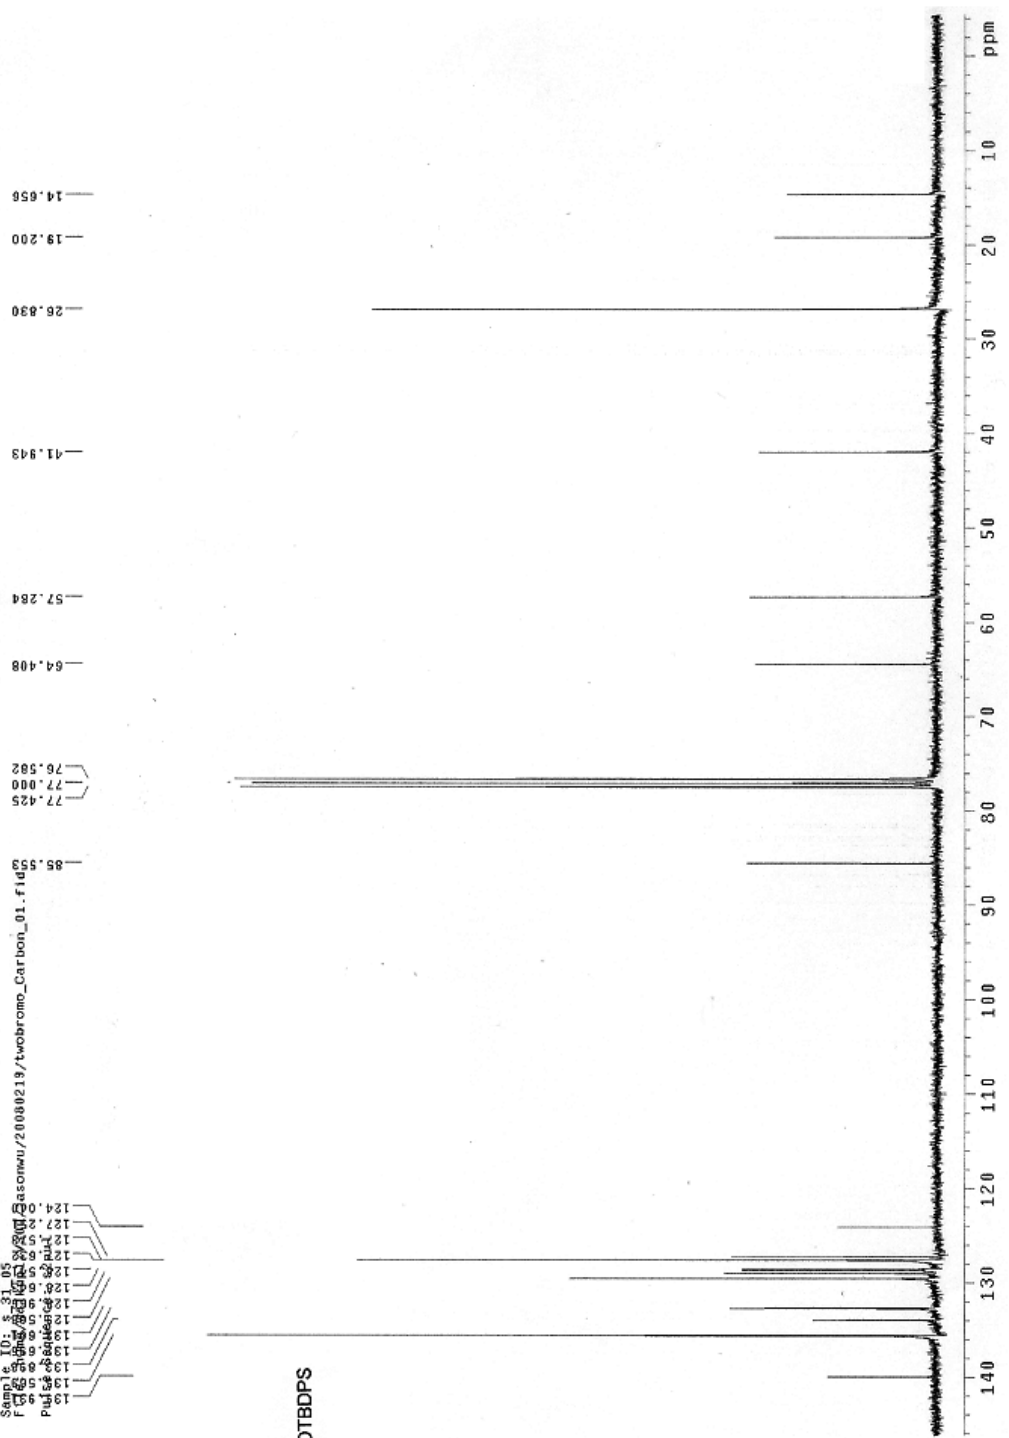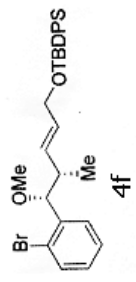

Sample: naphTBDPS  
Sample ID: s\_14\_01  
Files: home/va1kup1/v100/jasonwu/20080918/naphTBDPS\_Proton\_01.fid  
Pulse Sequence: s2pul

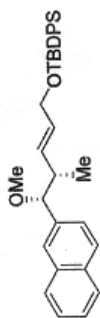

4g

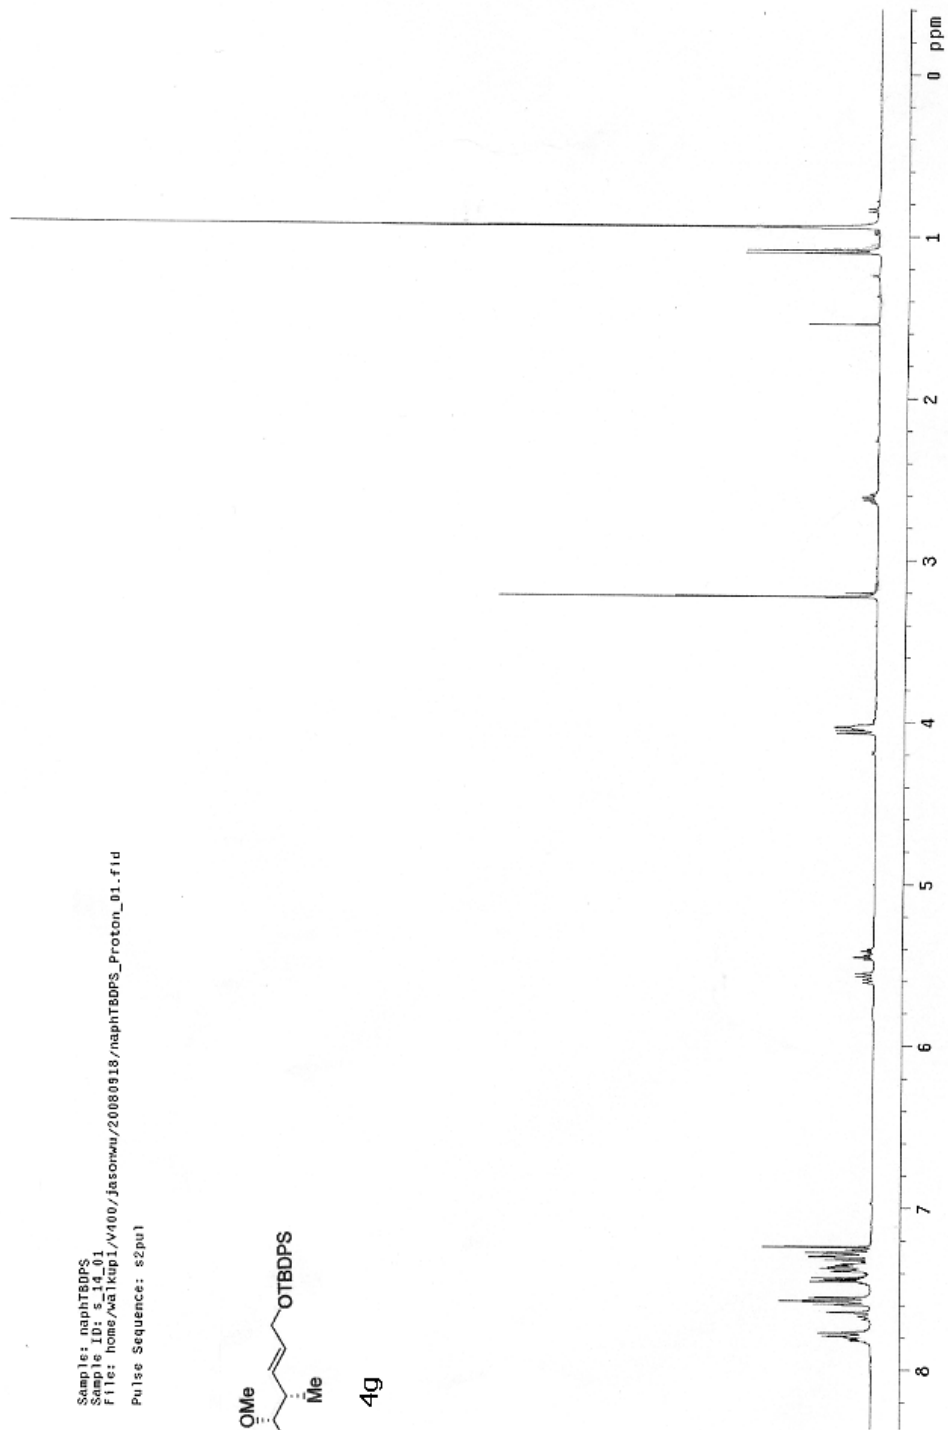

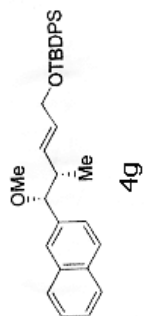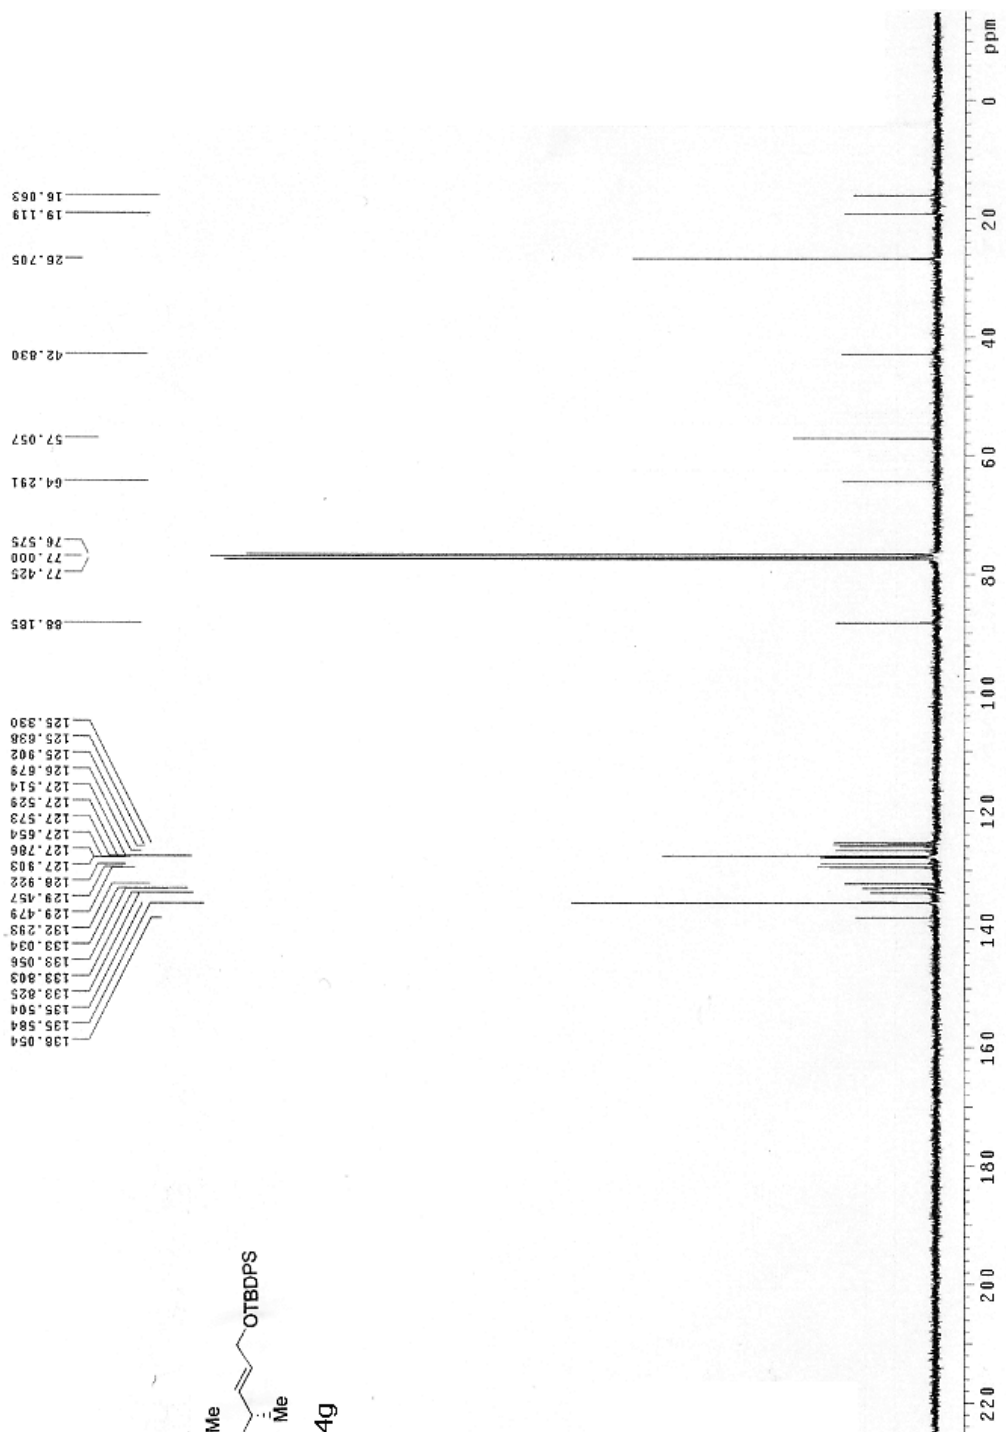

Sample: OMe25\_OBn\_OTBDPS\_ether  
Sample ID: s\_36\_01  
File: home/Wgikip1/V400/chenyu/20081201/OMe25\_OBn\_OTBDPS\_ether\_Proton\_01.fid  
Pulse Sequence: s2pu1

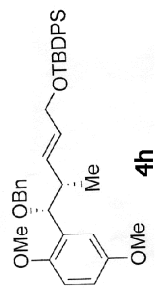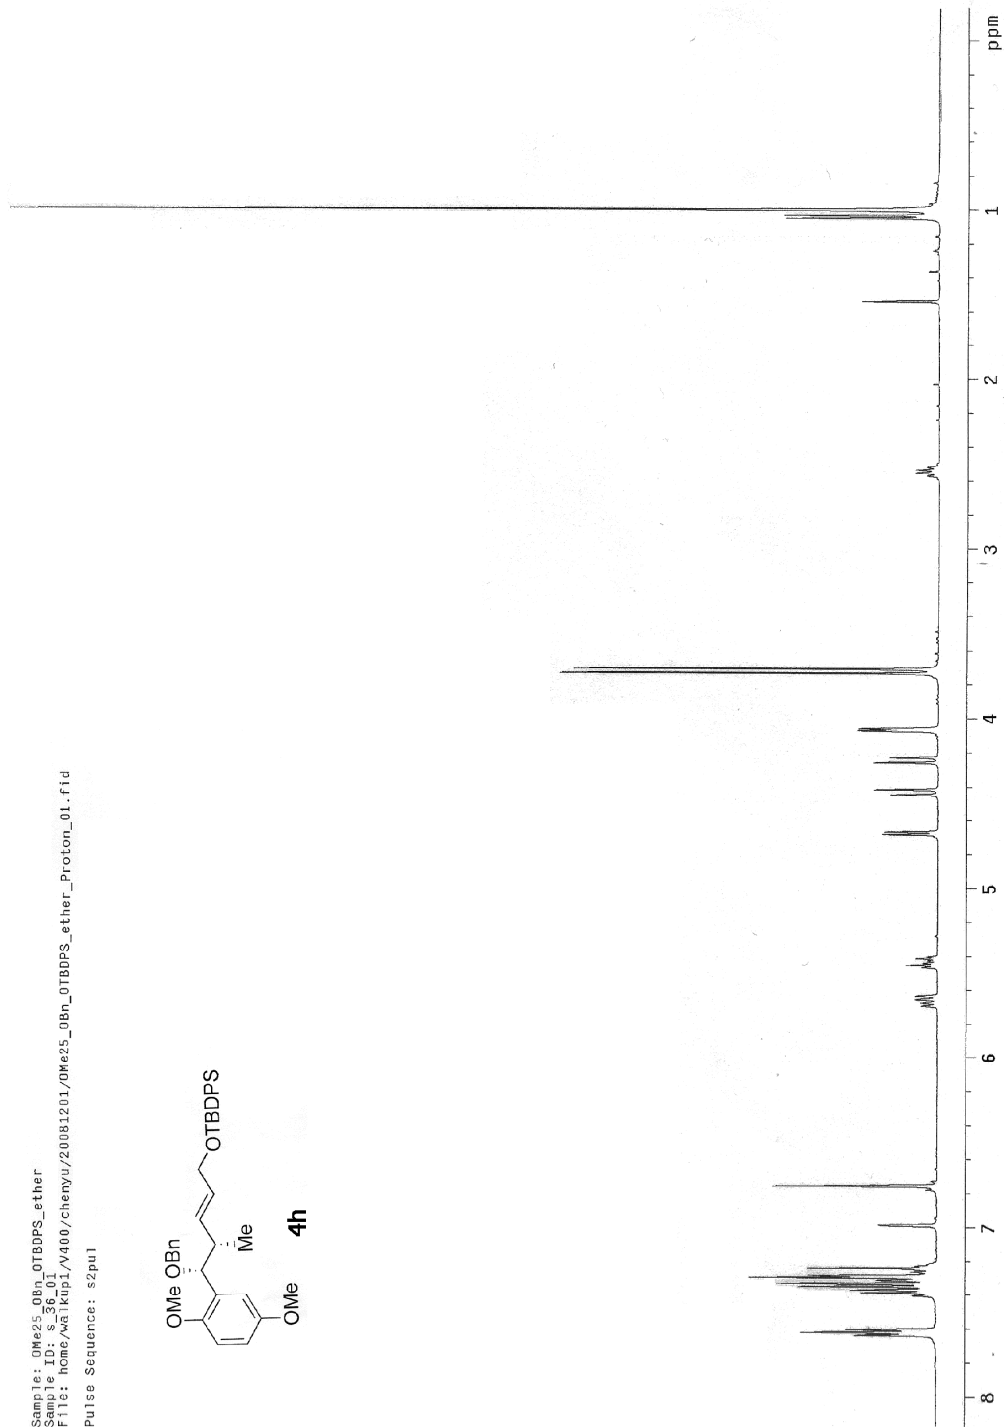

pad1 run with findz0 before acquisition  
 pad1 run with gradshim before acquisition

Sample: OBn  
 Sample ID: s\_43\_01  
 File: home\alkkup1\V300\Jasco\04\20080628\08030301152.d  
 Pulse Sequence: szpul

159.0  
 151.7  
 138.9  
 138.5  
 133.9  
 133.8  
 130.5  
 129.4  
 128.3  
 128.1  
 127.6  
 127.5  
 127.2  
 127.1  
 119.229  
 112.753  
 111.404  
 78.620  
 77.425  
 77.000  
 76.582  
 70.917  
 64.562  
 55.877  
 55.657  
 42.134  
 28.815  
 19.185  
 15.477

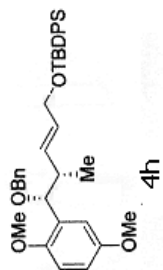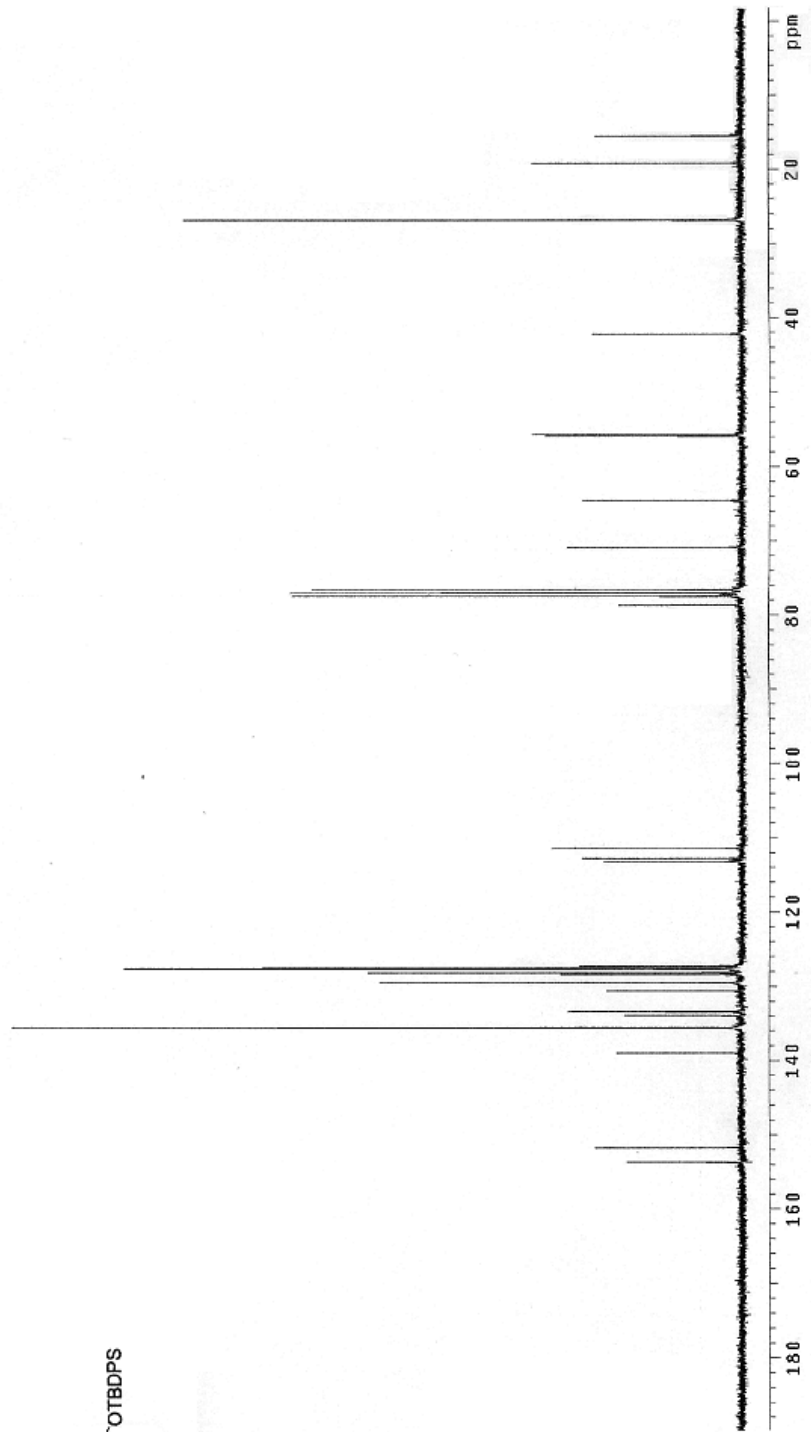

Sample: ph08n  
Sample ID: s\_1\_02  
File: home/waikup1/V400/jasomwu/20081014/ph08n\_Proton\_01.fid  
Pulse Sequence: s2pu1

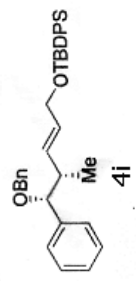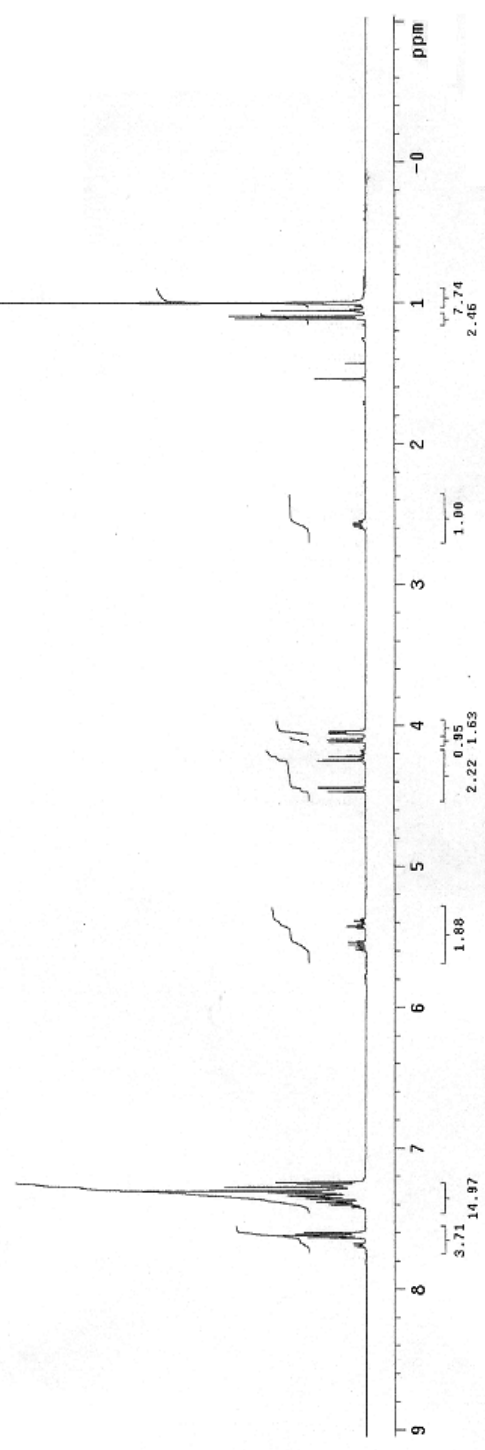

Sample: ph08n  
Sample ID: s\_1\_01  
File: home/walkup1/V400/Jasonwu/20081015/ph08n\_Carbon\_01.fid  
Pulse Sequence: s2pu1

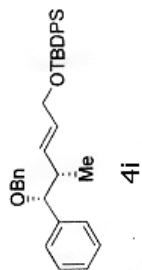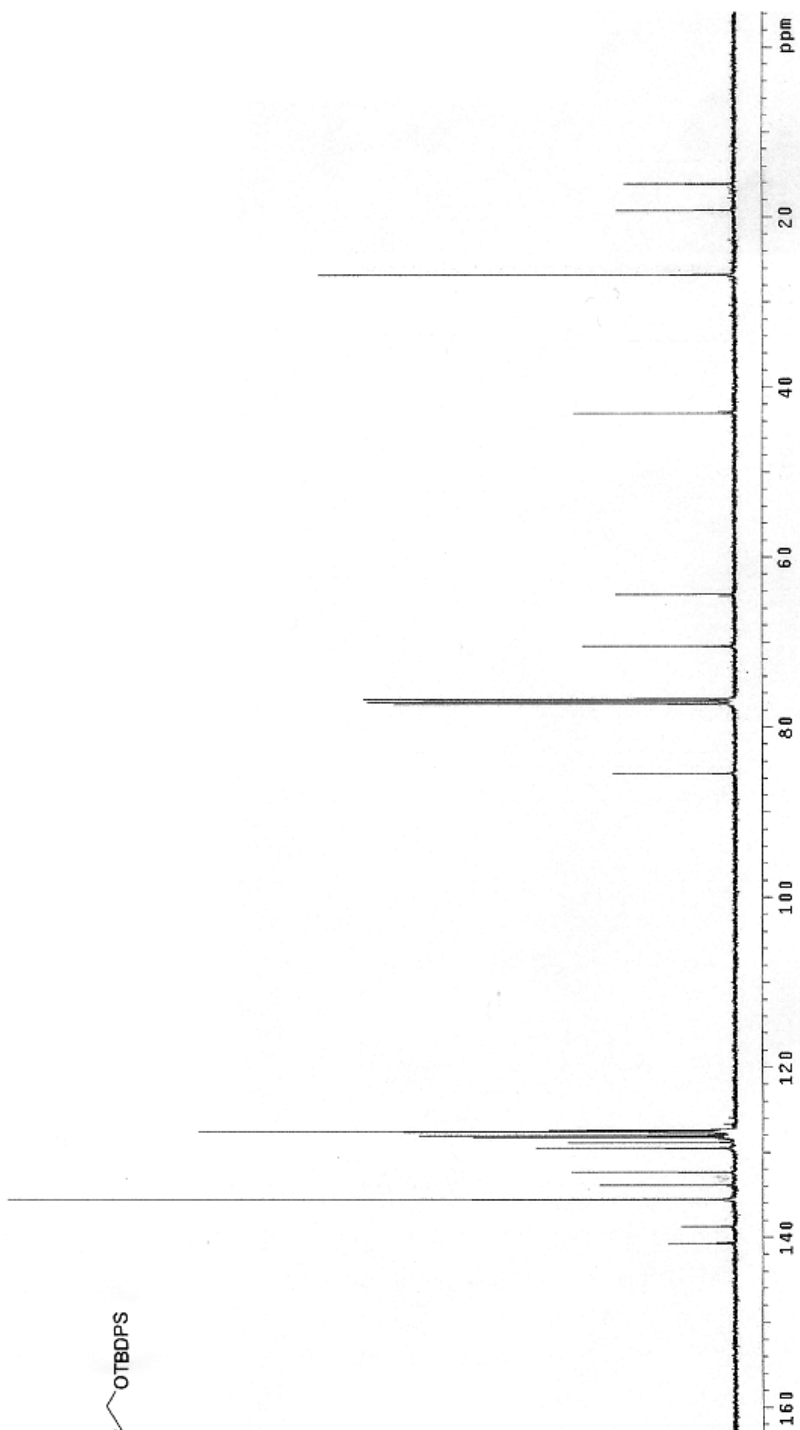

Sample: cyclob  
Sample ID: s\_42\_06  
File: home/walakup1/V000/jasonwu/20080223/cyclob\_Proton\_01.fid  
Pulse Sequence: s2pu1

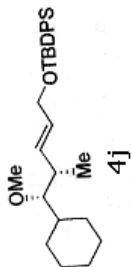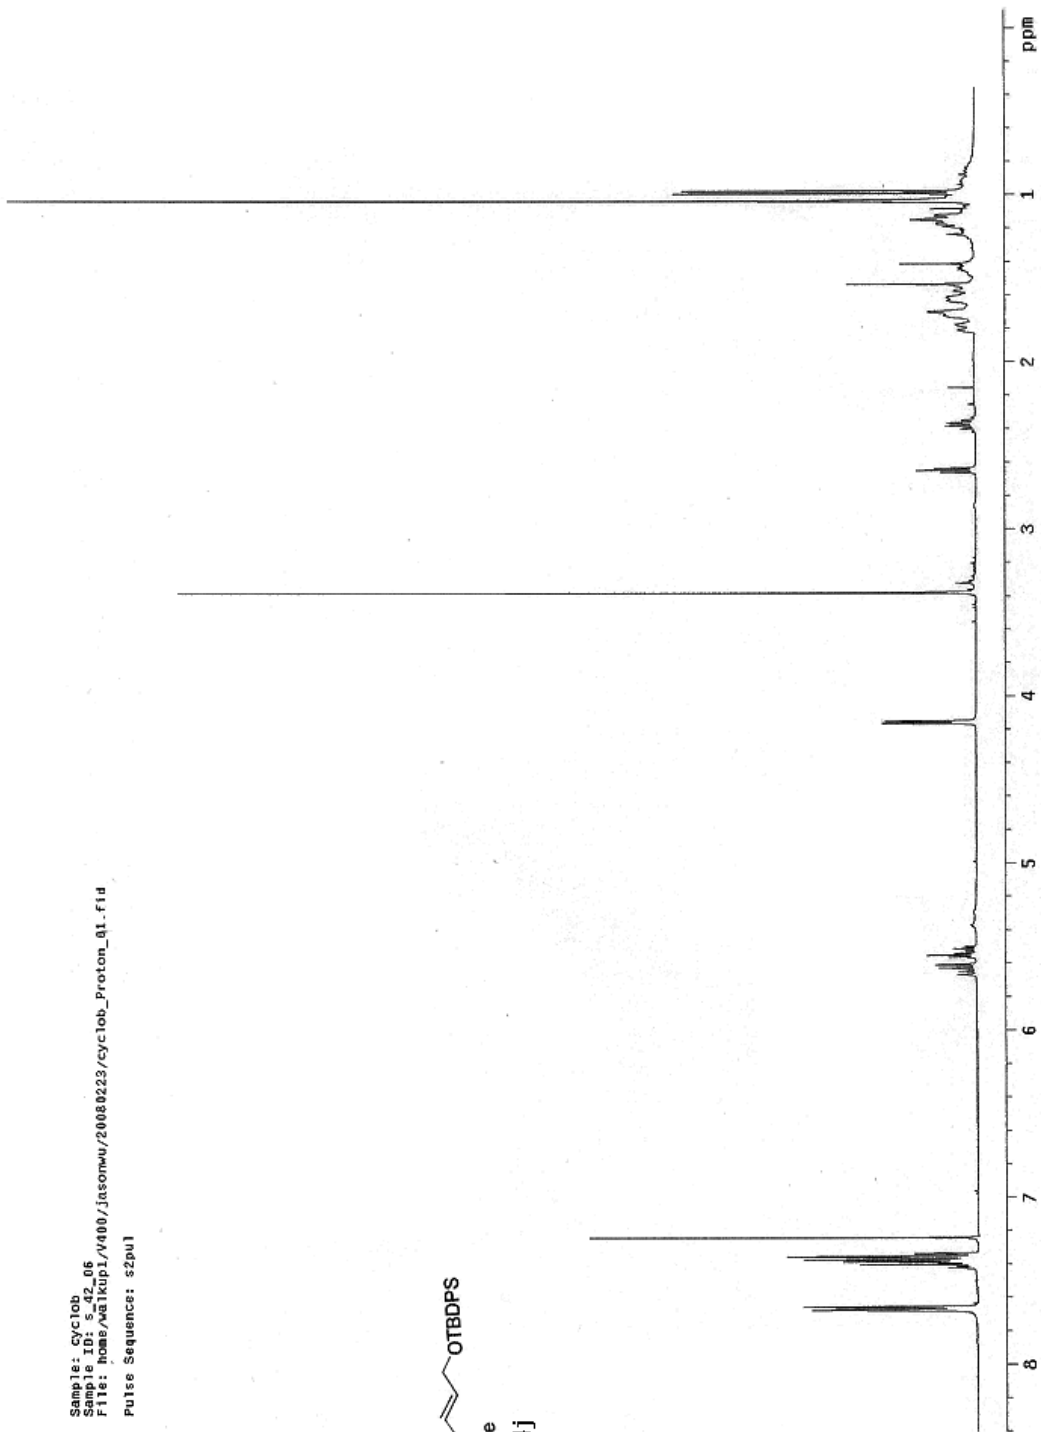



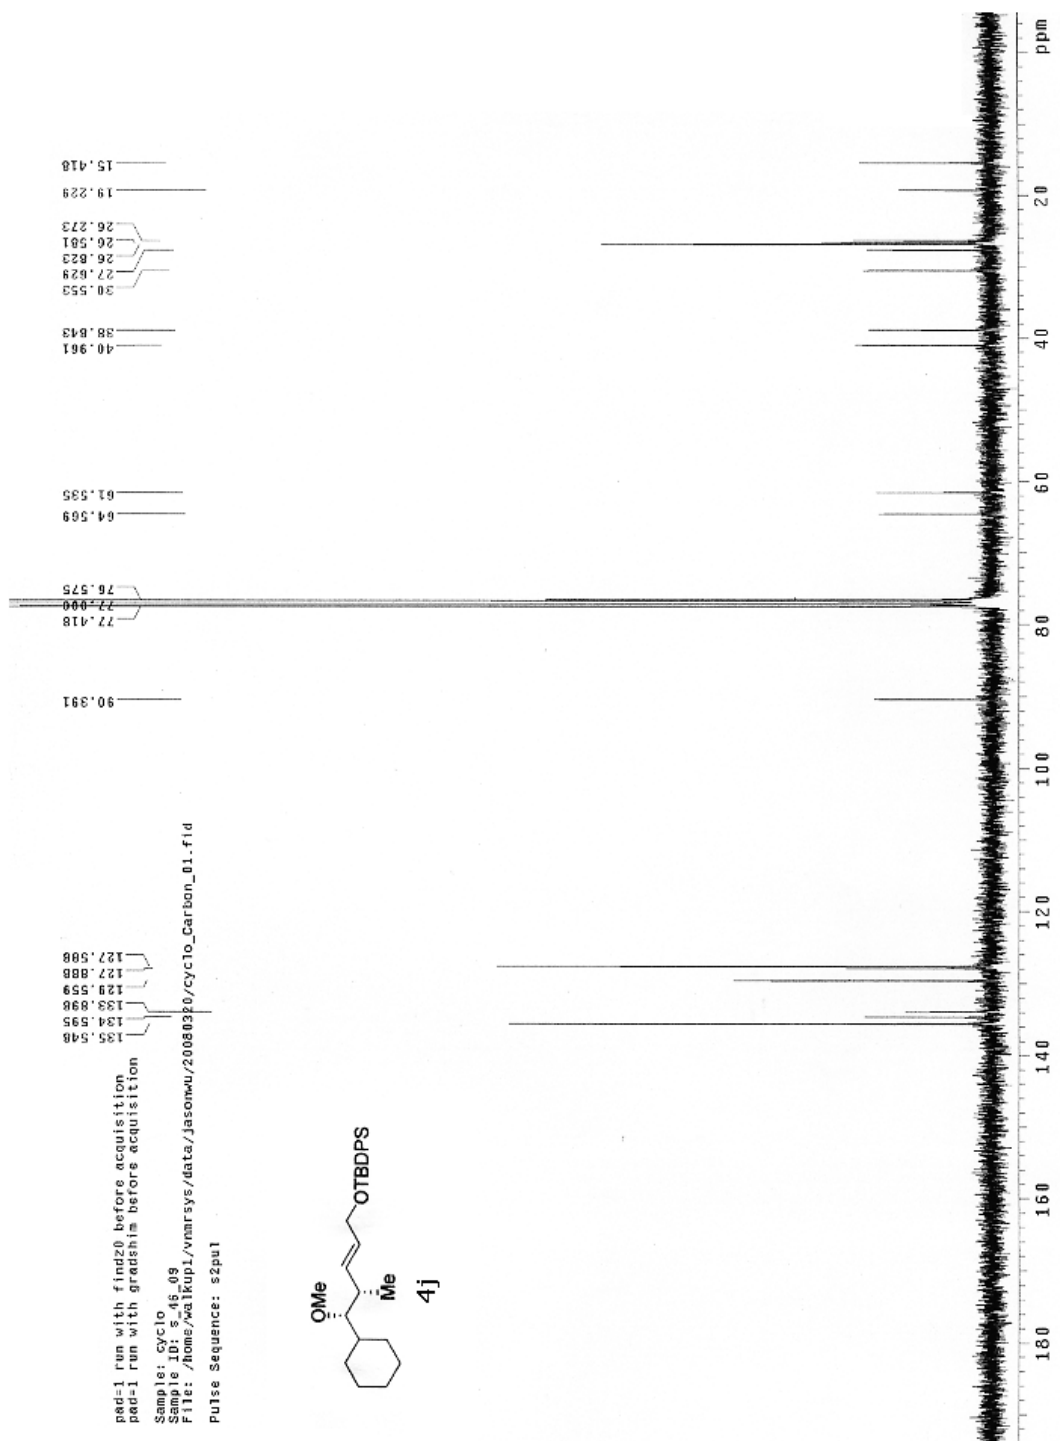

Sample: crotylation\_5C\_down  
Sample ID: 5-5-03  
File: home/Walidkopi/V4100/chenyv/20080923/crotylation\_5C  
Pulse Sequence: s2pu1

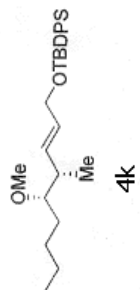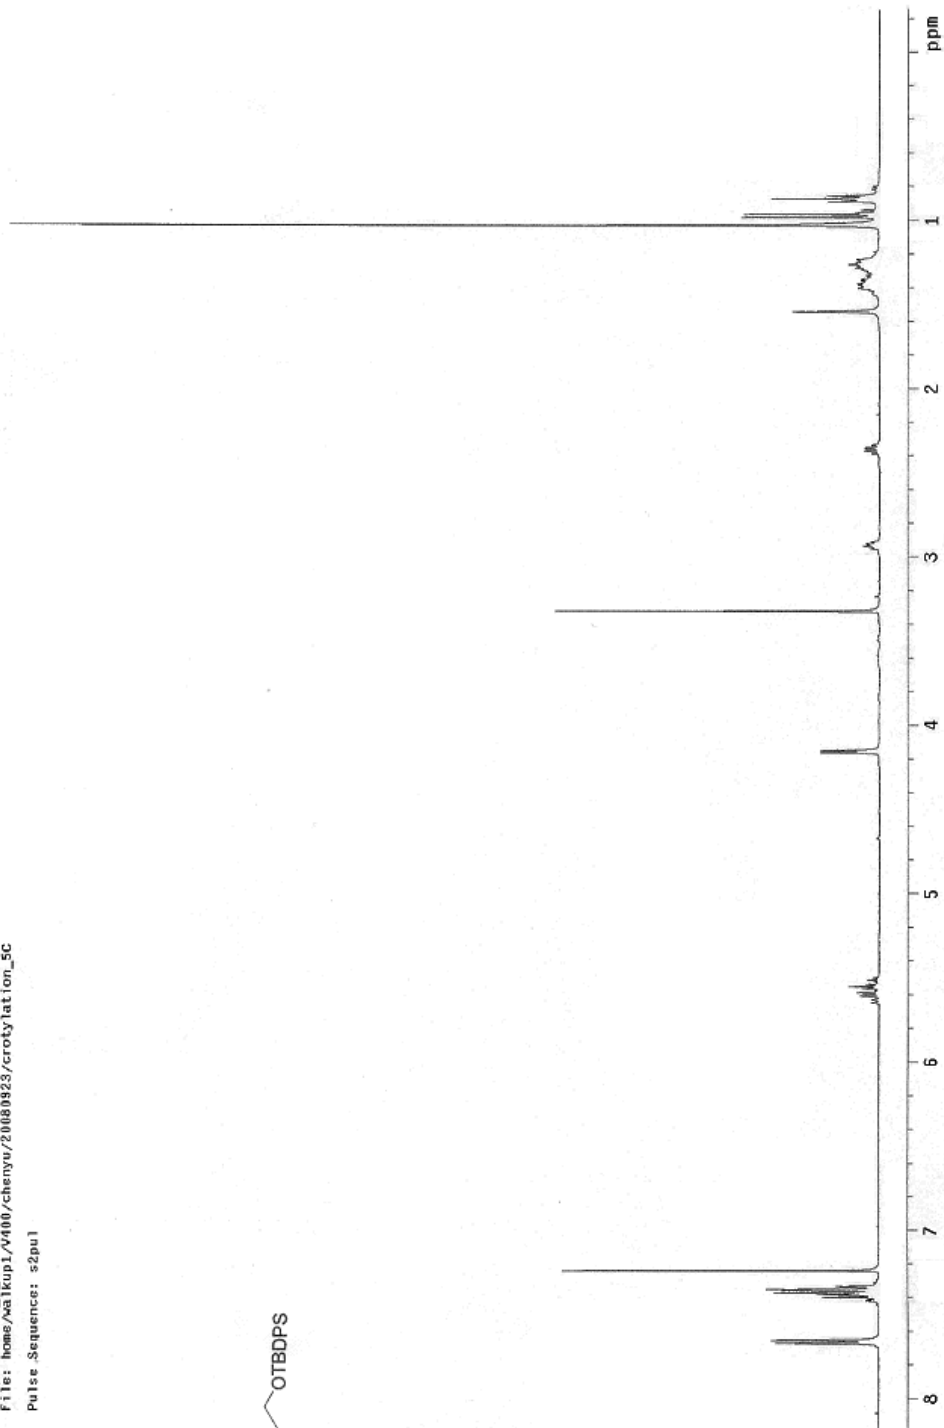

Sample: penty1  
 Sample ID: s\_37\_02  
 File: home\NalKup1\4400\Jasonwu\2000223\penty\_Carbon\_01.fid  
 Pulse Sequence: zgpg30

133.0  
 133.0  
 133.0  
 133.0  
 129.4  
 128.4  
 127.5  
 127.5

85.179

77.312  
77.000  
76.680

84.708  
84.678

57.643  
57.591

39.327

30.760  
27.749  
26.841  
26.812

22.922

19.219

15.028

14.118

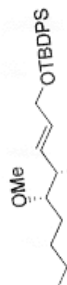

4k

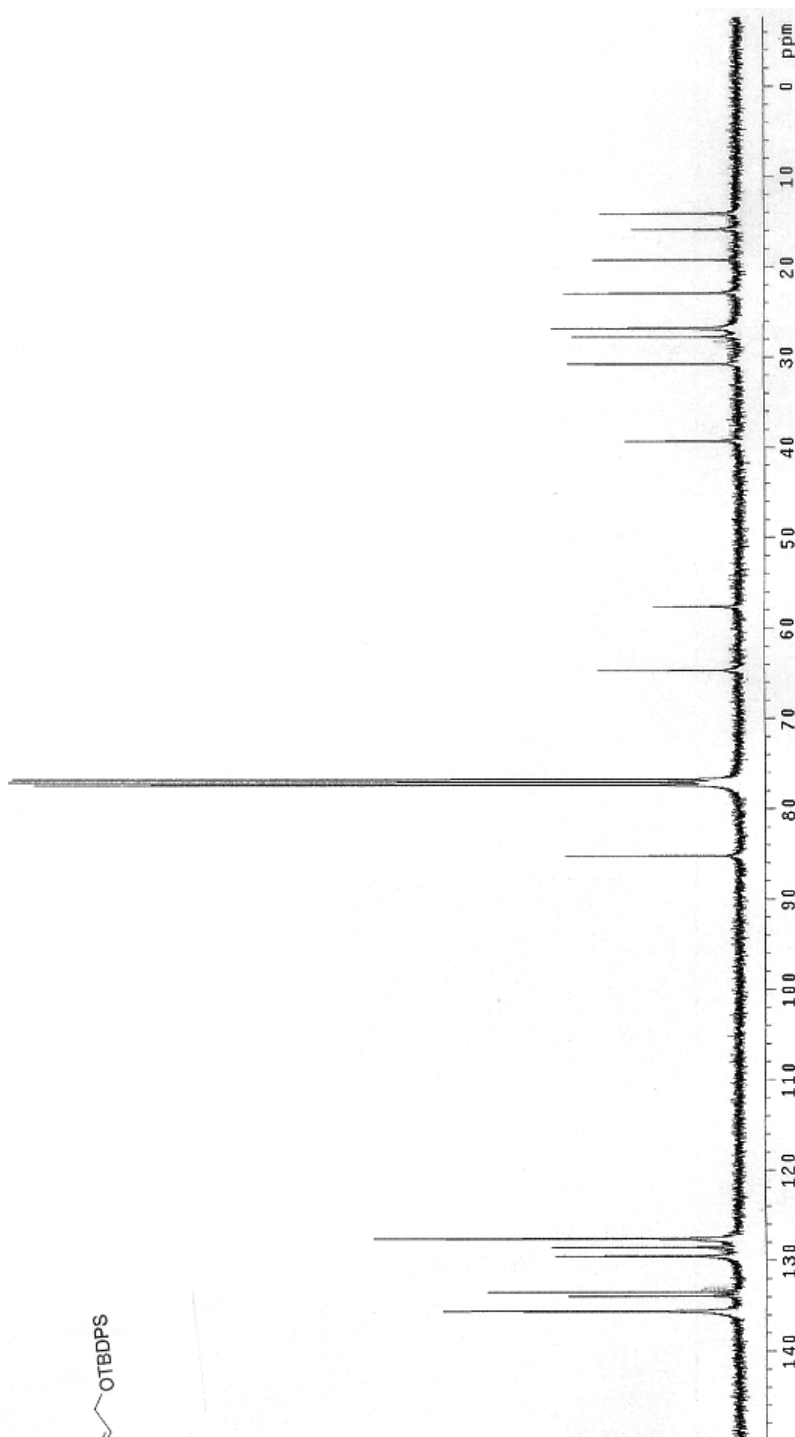

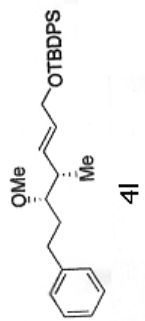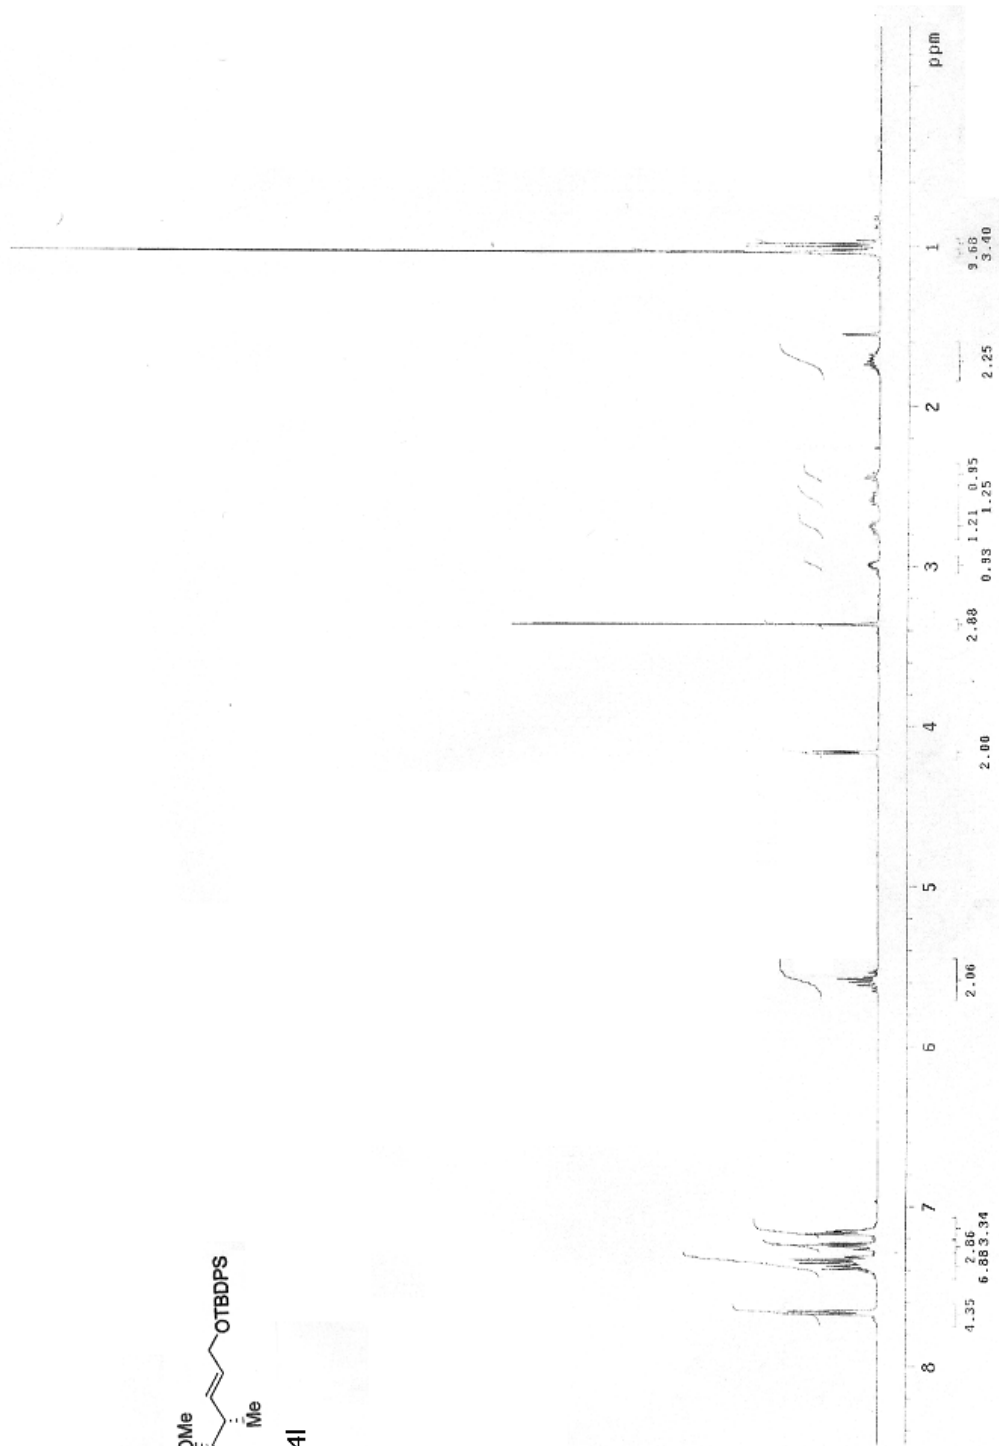

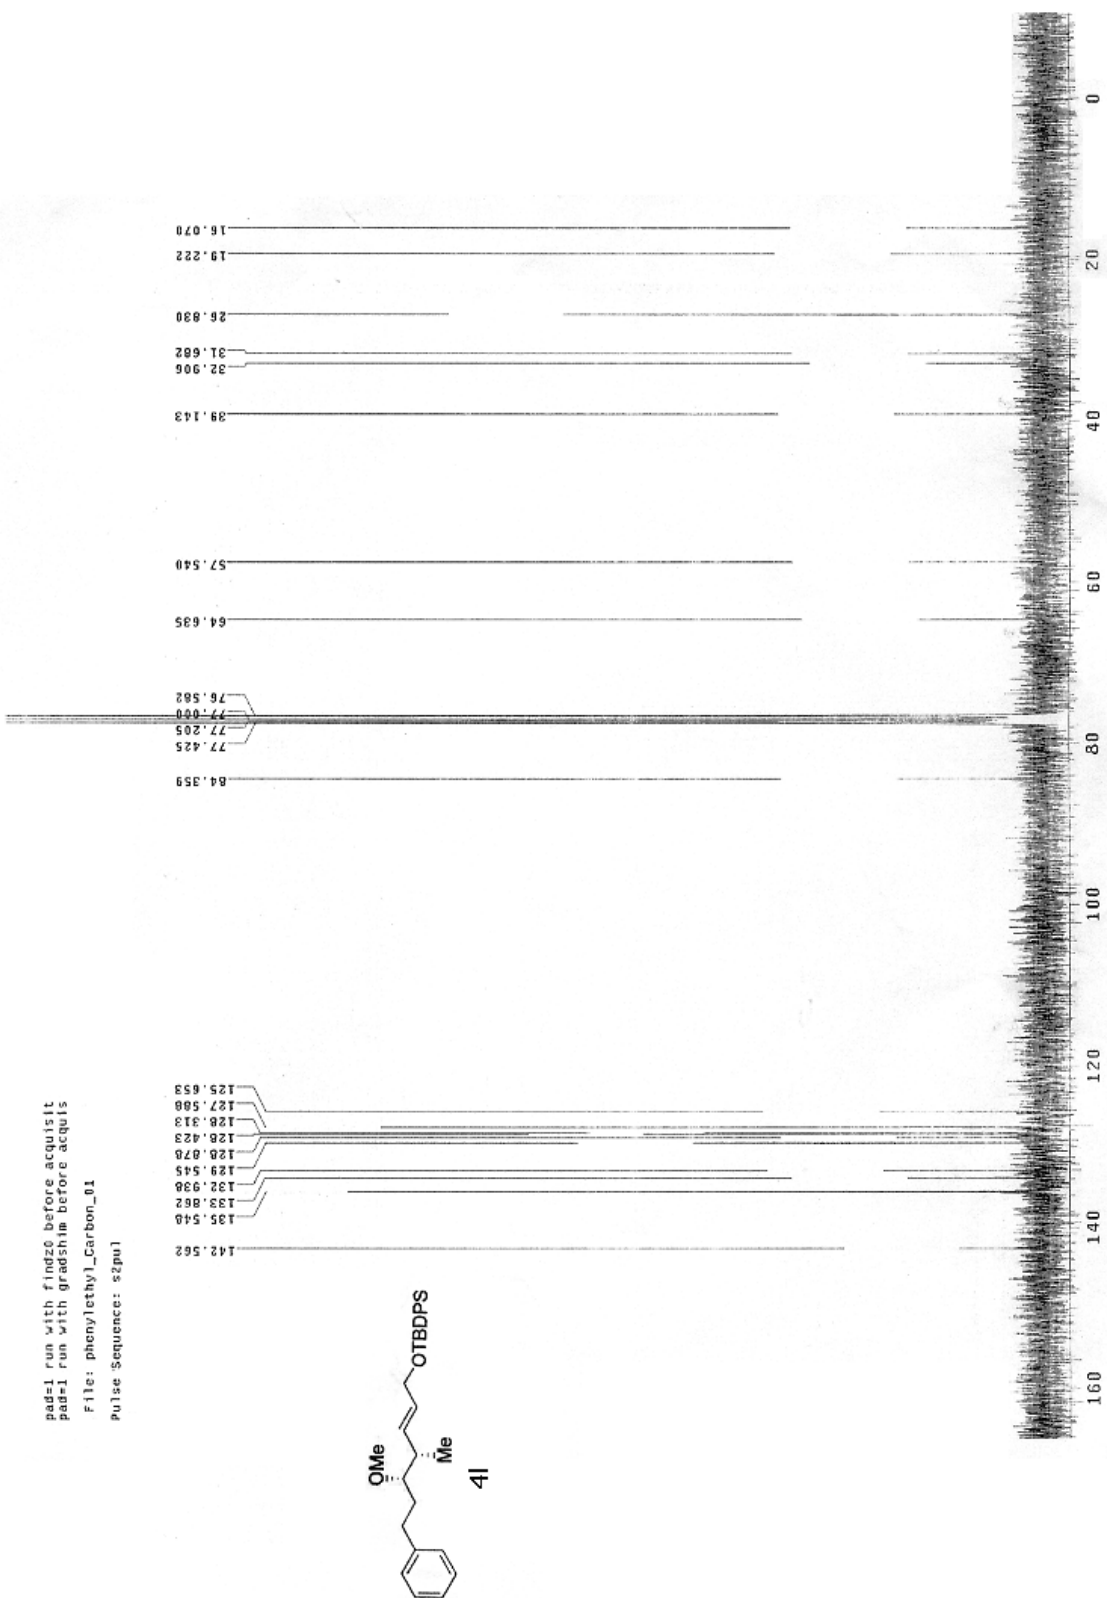

oallylotbdpsp  
Sample Name: oallylotbdpsp  
Data collected on: 2/22/2010 12:40:40  
Archive directory: /home/walkup2/vnmrSYS/data/users/jasonwu/20100222  
Sample directory: oallylotbdpsp\_01  
Fid file: oallylotbdpspPROTON01  
Pulse Sequence: PROTON (szpul)  
Solvent: cdcl3  
Data collected on: Feb 22 2010

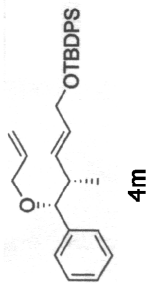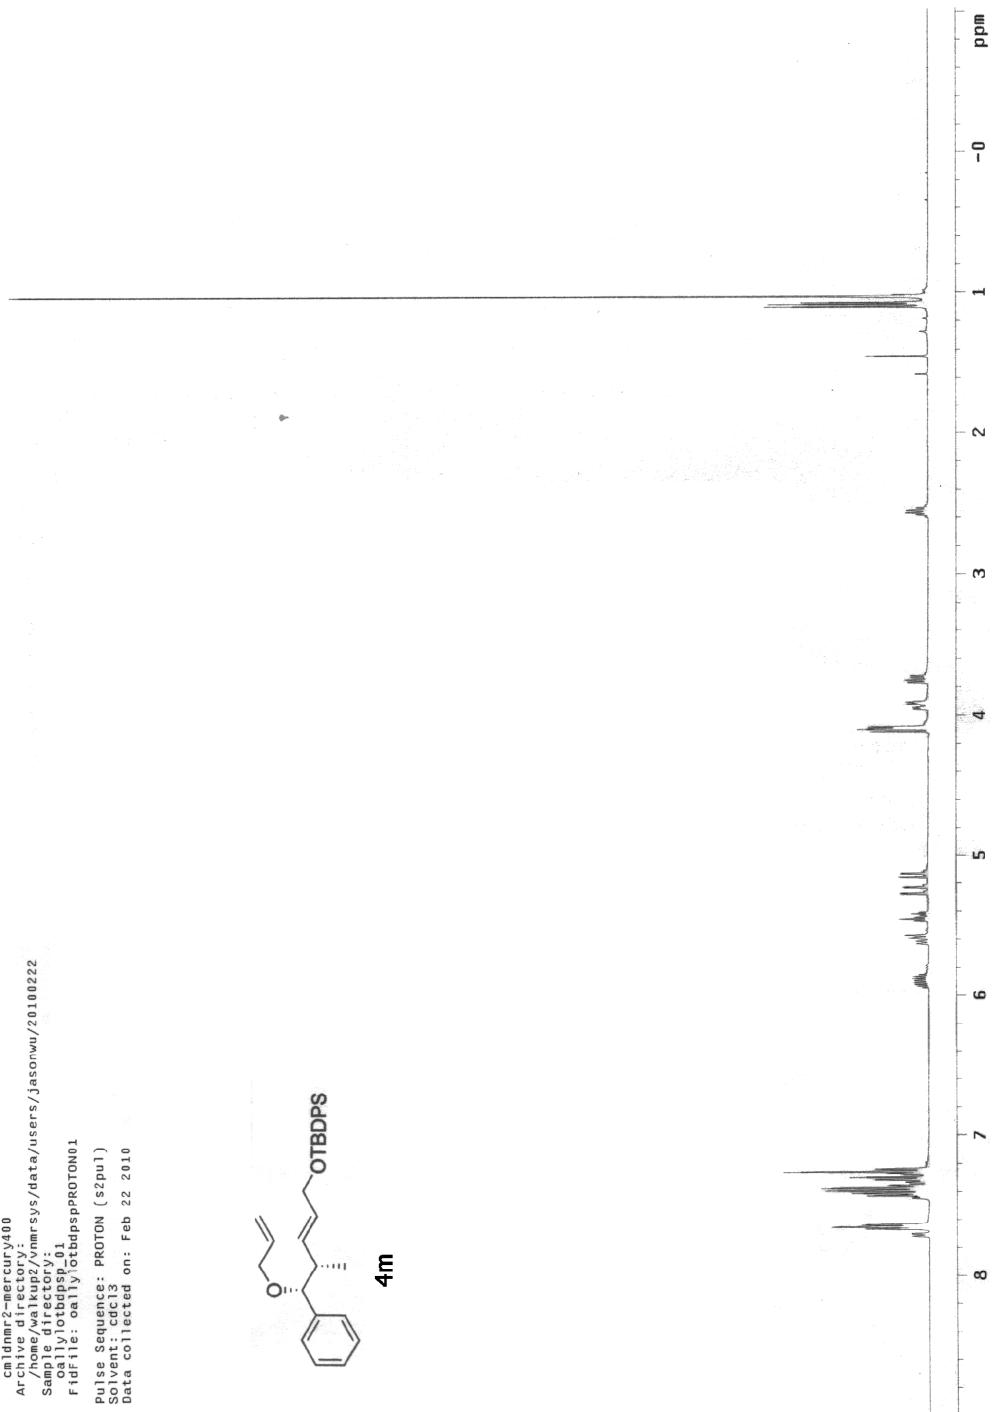

Sample: minorp  
Scan ID: 39\_02  
File: /home/walkup3/vnmrSYS/data/jasonwu/20100223/minorp\_Carbon\_01  
Automation directory: /home/walkup3/vnmrSYS/data/auto\_2010-02-19\_01

Pulse Sequence: sZpu1

Solvent: cdCl3  
Ambient temperature  
Sample #39, Operator: jasonwu  
File: minorp\_Carbon\_01  
VNMRS-300 43000

Relax. delay 1.000 sec  
Pulse delay 0.000 sec  
Acq. time 1.301 sec  
Width 18115.9 Hz  
5000 repetitions  
OBSERVE C13, 75.4293946 MHz  
DECOUPLE H1, 299.9789690 MHz  
Power 37.000 dB  
SOLVENT on  
WALTZ-16 modulated  
DATA PROCESSING  
Line broadening 0.5 Hz  
FT size 65536  
Total time 3 hr, 12 min, 27 sec

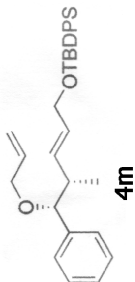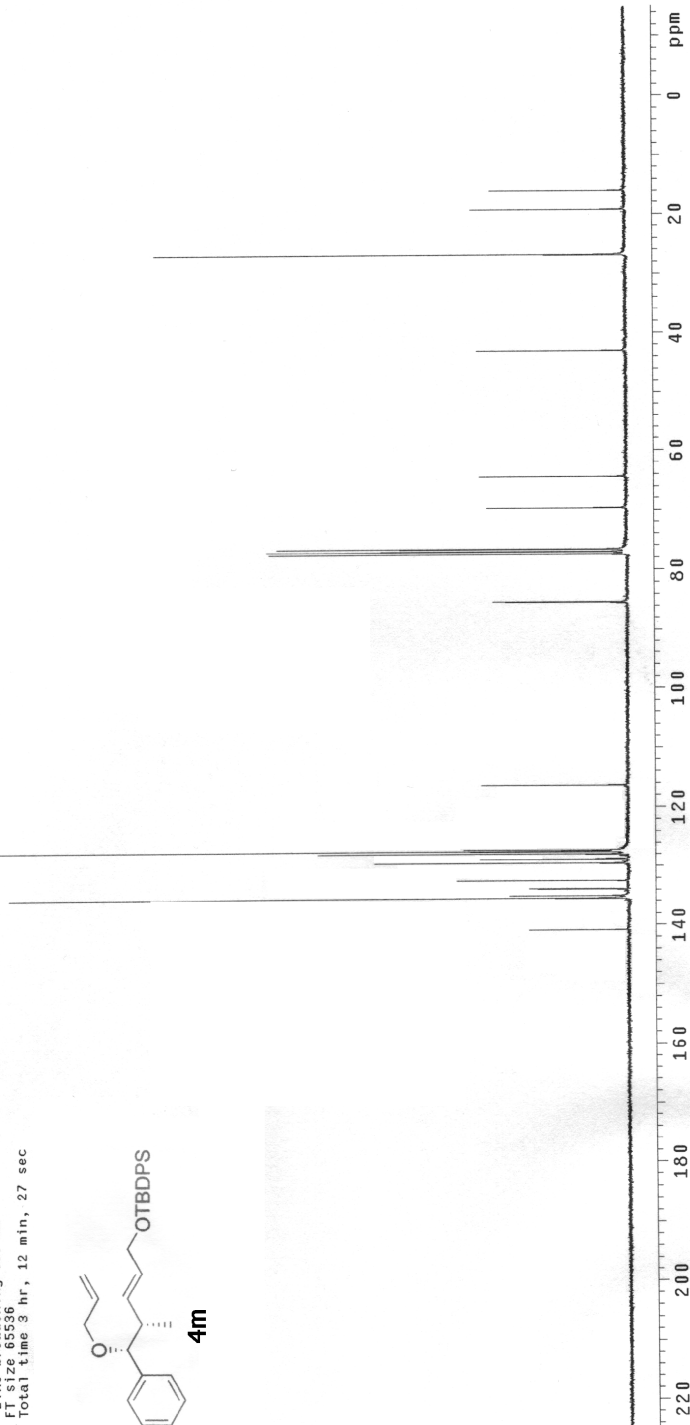

Sample: evamp  
Sample ID: 45\_05  
File: home\m\kdp1\400\jasomw\20081018\evamp\_Proton\_01.fid  
Pulse Sequence: s2pu1

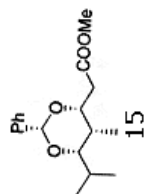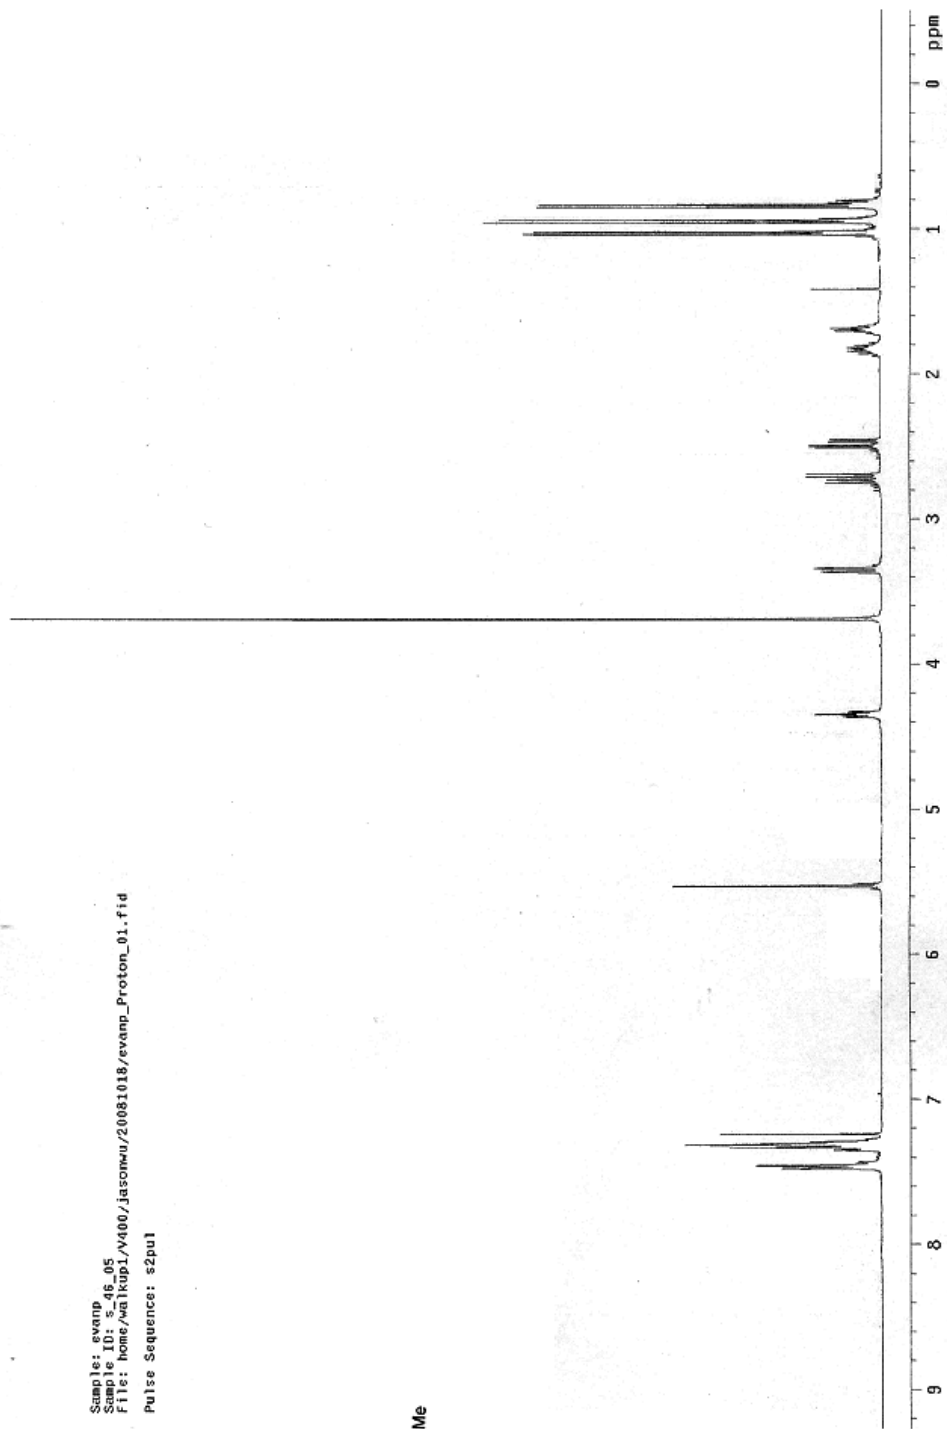



pad-1 run with gradshim before acquisition  
pad-1 run with gradshim before acquisition

Sample: ep  
Sample ID: 5\_29\_02  
File: home/vikup1/V300/Jasonwu/20081018/ep\_Noesy1d\_01.fid  
Pulse Sequence: NOESY1D

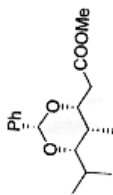

15

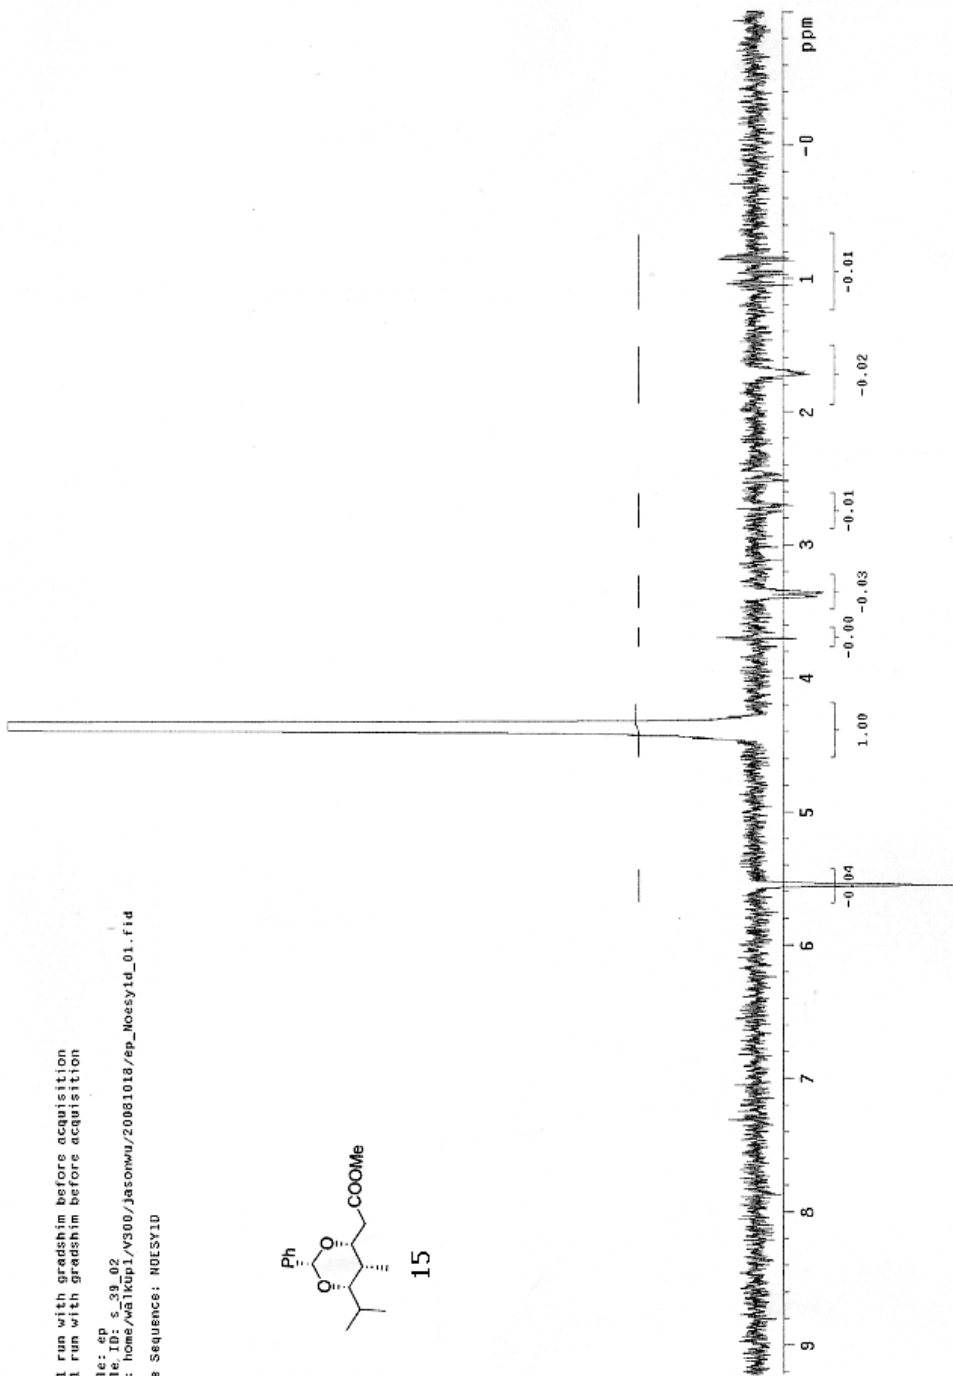

Supplement: NIHMS196197-supplement-1_si_001.pdf [file NIHMS196197-supplement-1_si_001.pdf]
